# Supplementary material for: Transcriptional and Morpho-Physiological Responses of Marchantia polymorpha upon Phosphate Starvation
Source: MDPI journal article supplement (doi:10.3390/ijms21218354), 2020-11-07
Supplement: s1 [file s1]

## **Transcriptional and morpho-physiological responses of *Marchantia polymorpha* upon phosphate starvation**

Felix Rico-Reséndiz<sup>1</sup>, Sergio Alan Cervantes-Pérez<sup>2</sup>, Annie Espinal-Centeno<sup>1</sup>, Melissa Dipp-Álvarez<sup>1</sup>, Araceli Oropeza-Aburto<sup>2</sup>, Enrique Hurtado-Bautista<sup>3</sup>, Andres Cruz-Hernández<sup>4</sup>, John L. Bowman<sup>5</sup>, Kimitsune Ishizaki<sup>6</sup>, Mario A. Arteaga-Vázquez<sup>7</sup>, Luis Herrera-Estrella<sup>2,8</sup> and Alfredo Cruz-Ramírez<sup>1\*</sup>

### **Supplementary information:**

#### **phylogenetic reconstructions**

To identify the putative orthologous genes involved in Pi starvation responses, we select a core of previous characterized genes from *Arabidopsis* as query. Their functions are related to Pi sensing, lipid turnover and transport. Furthermore, to cover the land phylogeny we select the 25 genomes distributed along viridiplantae (*Figure 1S*). Genome data was taken from phytozome (<https://phytozome.jgi.doe.gov/pz/portal.html>), *P. abies* genome project (<http://congenie.org/blast>) and fern base (<https://www.fernbase.org/>). After data collection, according to the procedure described in the methods section, we change the ID of each sequence using the first letter of the name in upper case followed by the first two letters of the second name in lowercase (eg. *Marchantia polymorpha* = Mpo). Then we assigned a continuous number to make a difference between protein members of the same family (ei. Mpo\_001). Here, find you the phylogenetic reconstructions.

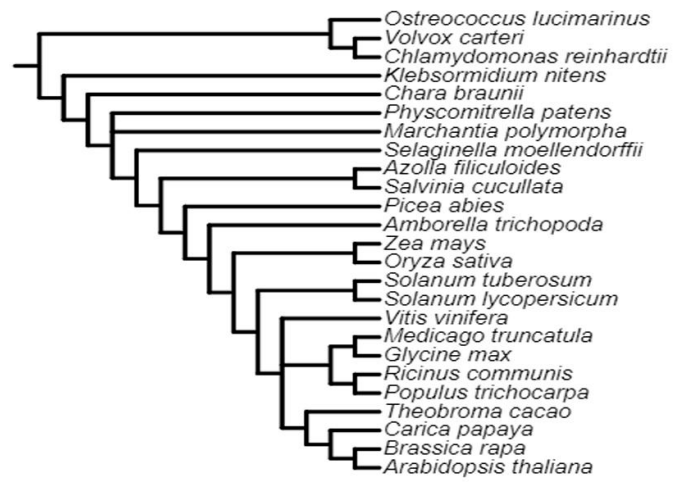

**Figure 1S. Species selected for the evolutionary analysis**



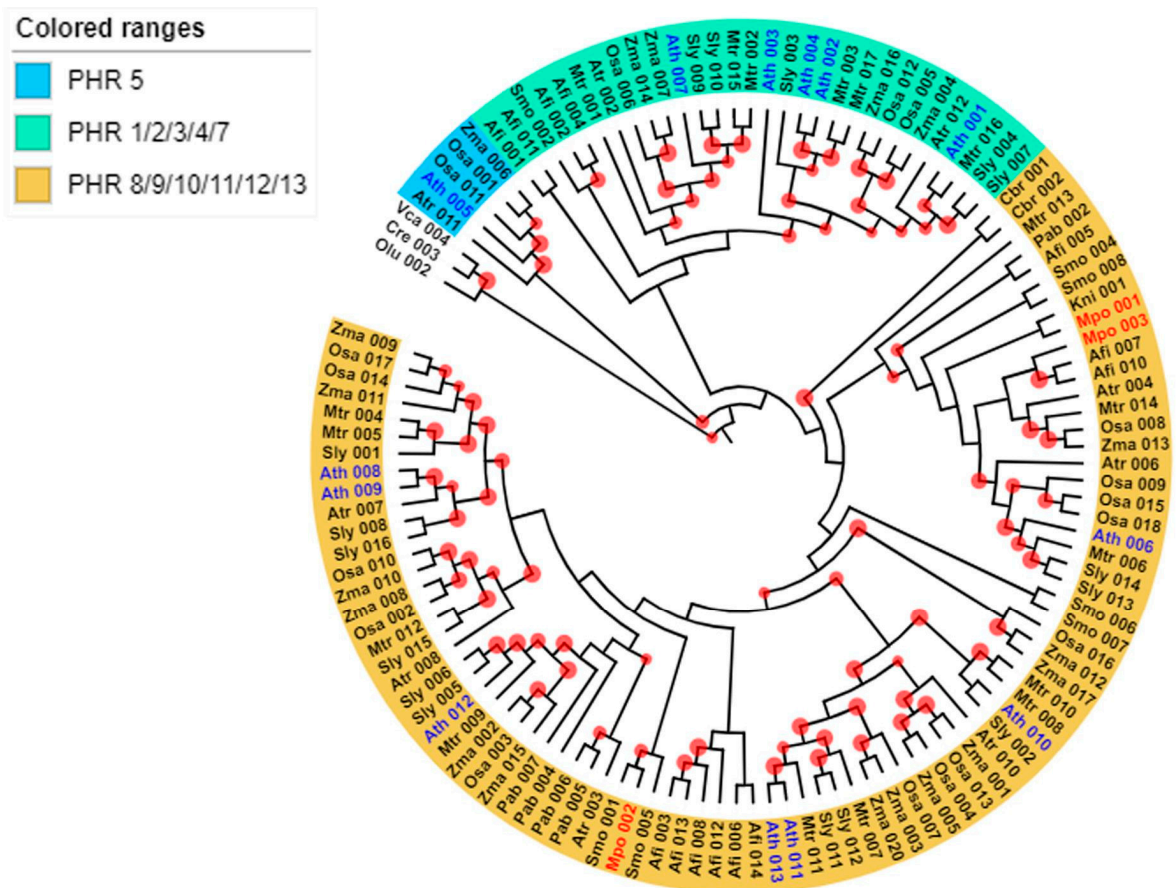

**Figure 3S.- Phylogenetic reconstruction of the MYB-CC family** (ML-PROT-JTT 1000 bootstrap). The chlorophyte algae forms the outgroup at the base of the tree, here Cre\_003 is the PSR1 gene. In blue light is the PHR5 clade, in green is the clade of PHR1/2/3/4/7 and in yellow the PHR 6/8/9/10/11/12/13. Labels of *A. thaliana* are colored in blue and *M. polymorpha* label is in red. The putative MpMYB-CC are in the yellow clade, MpPHR1 and MpPHR2 are closely related to AtPHR6 and MpPHR2 is close to AtPHR8/9/12. The bootstrap support values have been shown in red circle, in a range from 60-100% which correlates with circle size.

Colored ranges  
SIZ1

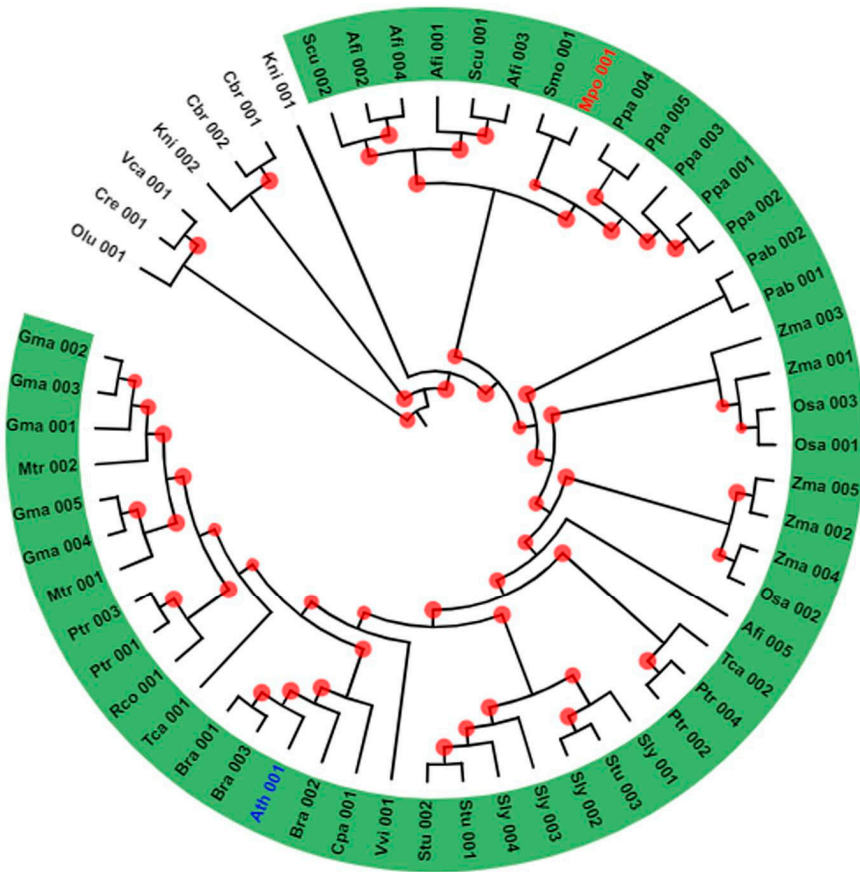

**Figure 4S.- Phylogenetic reconstruction of the SIZ1** (PROT-JTT-I-F 1000 bootstrap replicates). The phylogenetic reconstruction of SIZ1 correlates with the evolution of land plants. We find first the chlorophytes proteins, followed by the streptophyte algae sequences. The MpSIZ clusterize with sequences of *P. patens* and the early divergent vascular plants. Labels of *A. thaliana* are colored in blue and *M. polymorpha* label is in red. The bootstrap support values have been shown in red circle, in a range from 60-100% which correlates with circle size.



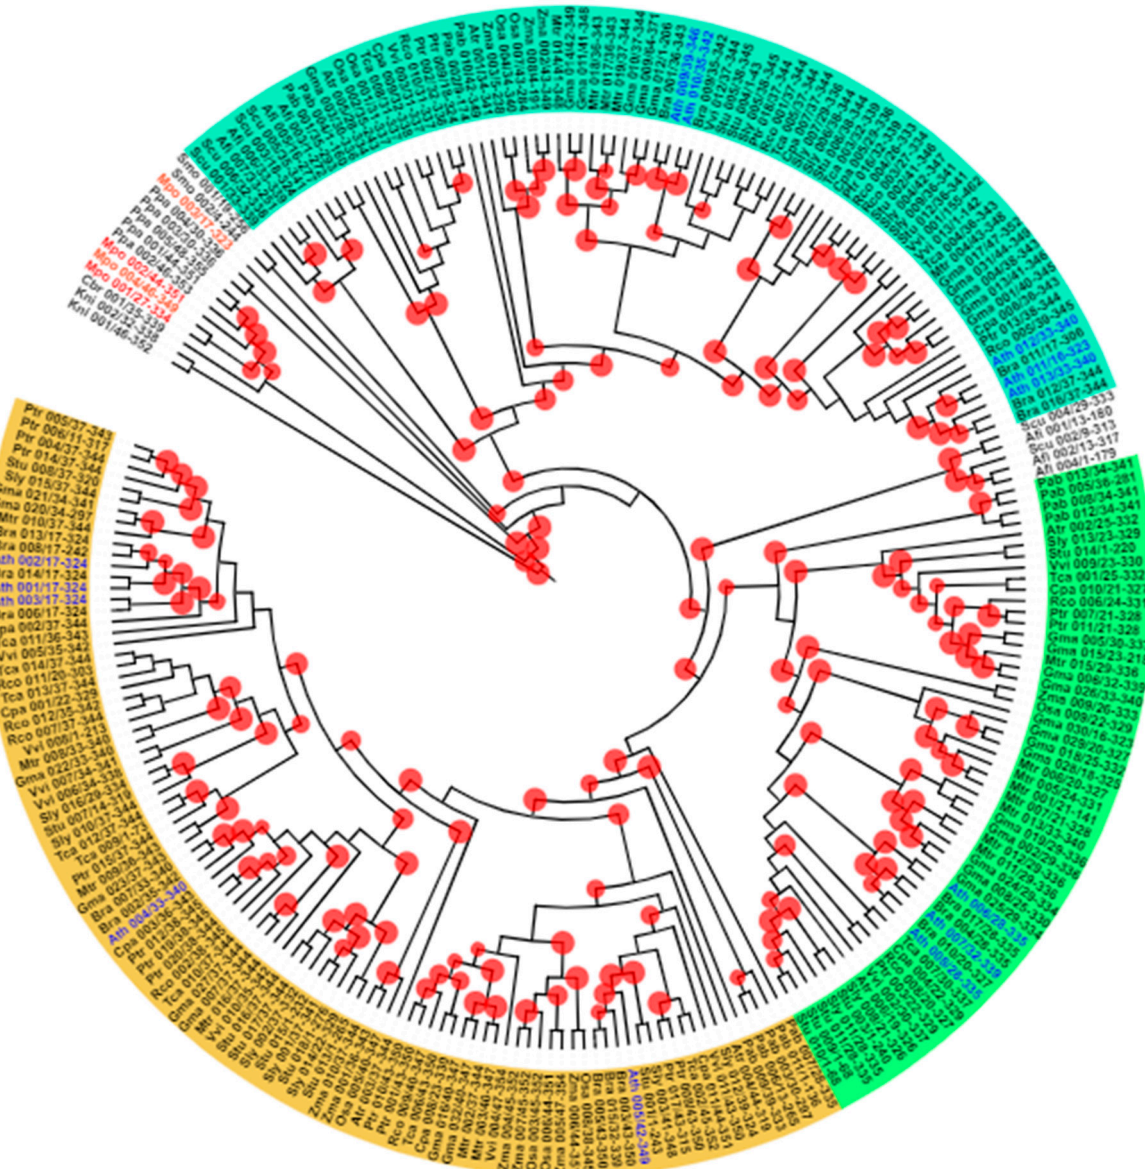

**Figure 6S.- Phylogenetic reconstruction of the ALMT1** (PROT-JTT-I-F 1000 bootstrap replicates). The sequences from non vascular plants and *S. moellendorffii* form an out group, when we found the four locus of *M. polymorpha*. then we found three major clades, in blue clade we found the *AtALMT9/10/11/12/13*. The green clade contains the *AtALMT6/7/8* and in yellow *AtALMT1/2/3/4/5*. Labels of *A. thaliana* are colored in blue and *M. polymorpha* label is in red. The bootstrap support values have been shown in red circle, in a range from 60-100% which correlates with circle size.

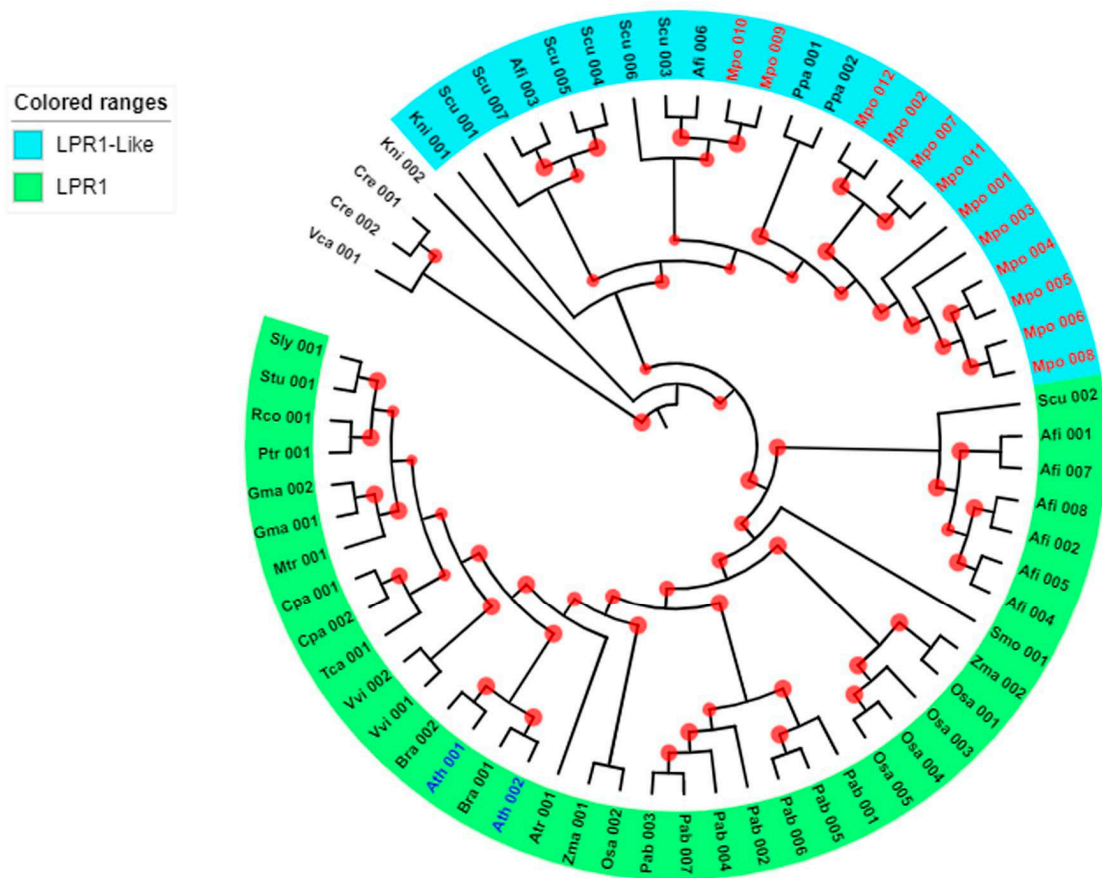

**Figure 7S.- Phylogenetic reconstruction of LPR-L** (PROT-JTT-I-F 1000 bootstrap replicates). The phylogenetic reconstruction of LPR1 shows two clades, the blue clade named LPR1-Like contains sequences from bryophytes to ferns and the other clade contains sequences from ferns to angiosperms. Labels of *A. thaliana* are colored in blue and *M. polymorpha* label is in red. The bootstrap support values have been shown in red circles, in a range from 60-100% which correlates with circle size.

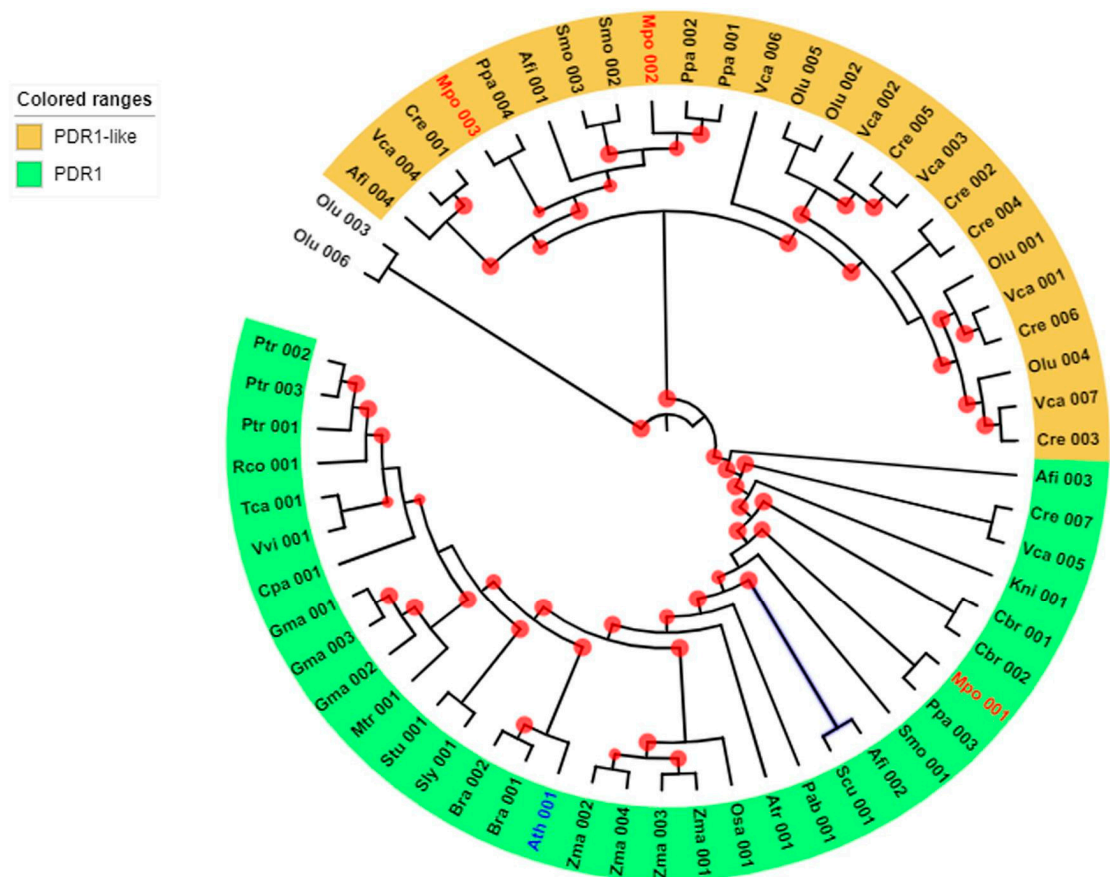

**Figure 8S.- Phylogenetic reconstruction of the PDR2** (PROT-JTT-I-F 1000 bootstrap replicates). The phylogenetic reconstruction clusterize the sequences in two clades, named PDR2-Like (Yellow) and PDR2 (Green). The PDR2-Like clade contains sequences from green algae to ferns, but not for flowering plants. The PDR2 clade displays sequences from green algae to flowering plants. Labels of *A. thaliana* are colored in blue and *M. polymorpha* label is in red. The bootstrap support values have been shown in red circle, in a range from 60-100% which correlates with circle size.

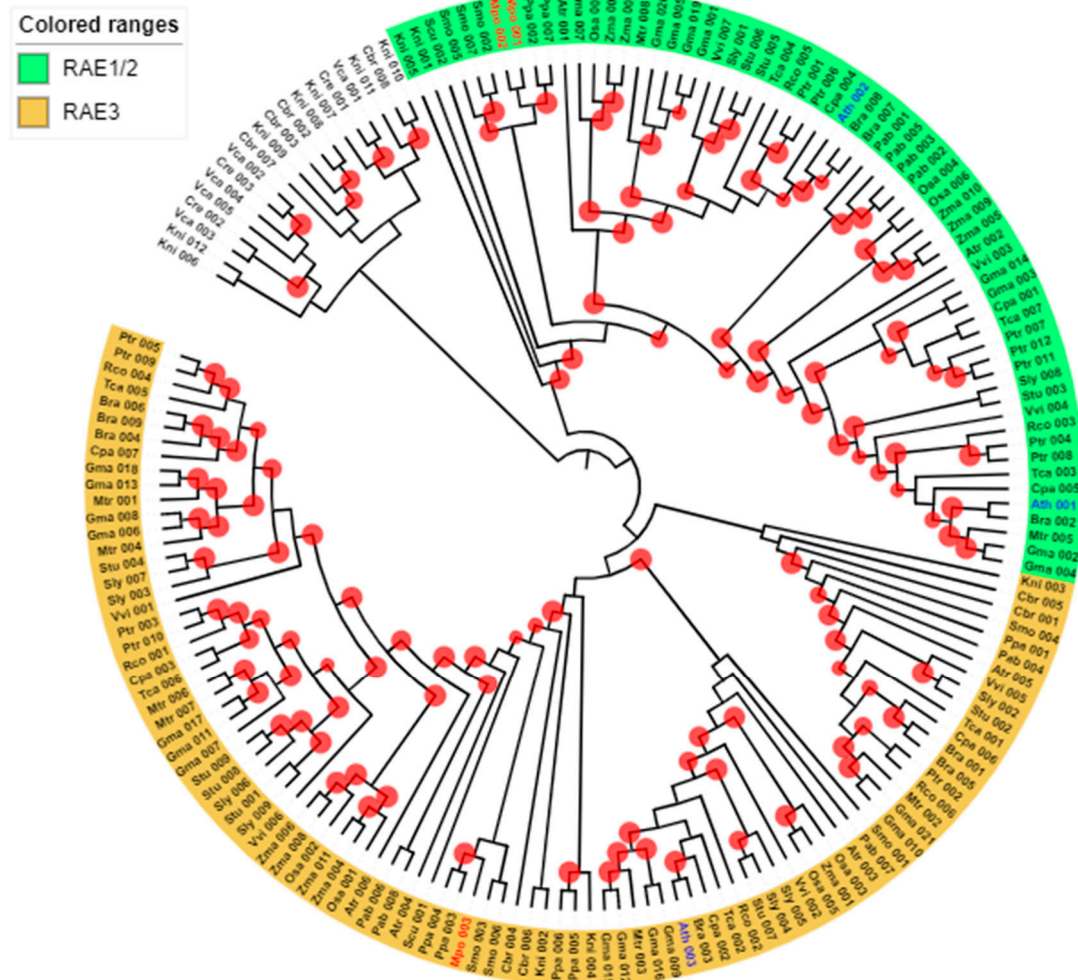

**Figure 9S.- Phylogenetic reconstruction of the RAE** (PROT-JTT-I-F 1000 bootstrap replicates). The phylogenetic reconstruction clusterize the sequences in two clades, named RAE1/2 (Green) and RAE3 (Yellow). The *M. polymorpha* sequences *MpRAE1/2* belong to the clade of RAE1/2 and are the most putative orthologous genes to *AtRAE1*. While the *MpRAE3* is clusterized with the *AtRAE3*. Labels of *A. thaliana* are colored in blue and *M. polymorpha* label is in red. The bootstrap support values have been shown in red circle, in a range from 60-100% which correlates with circle size.

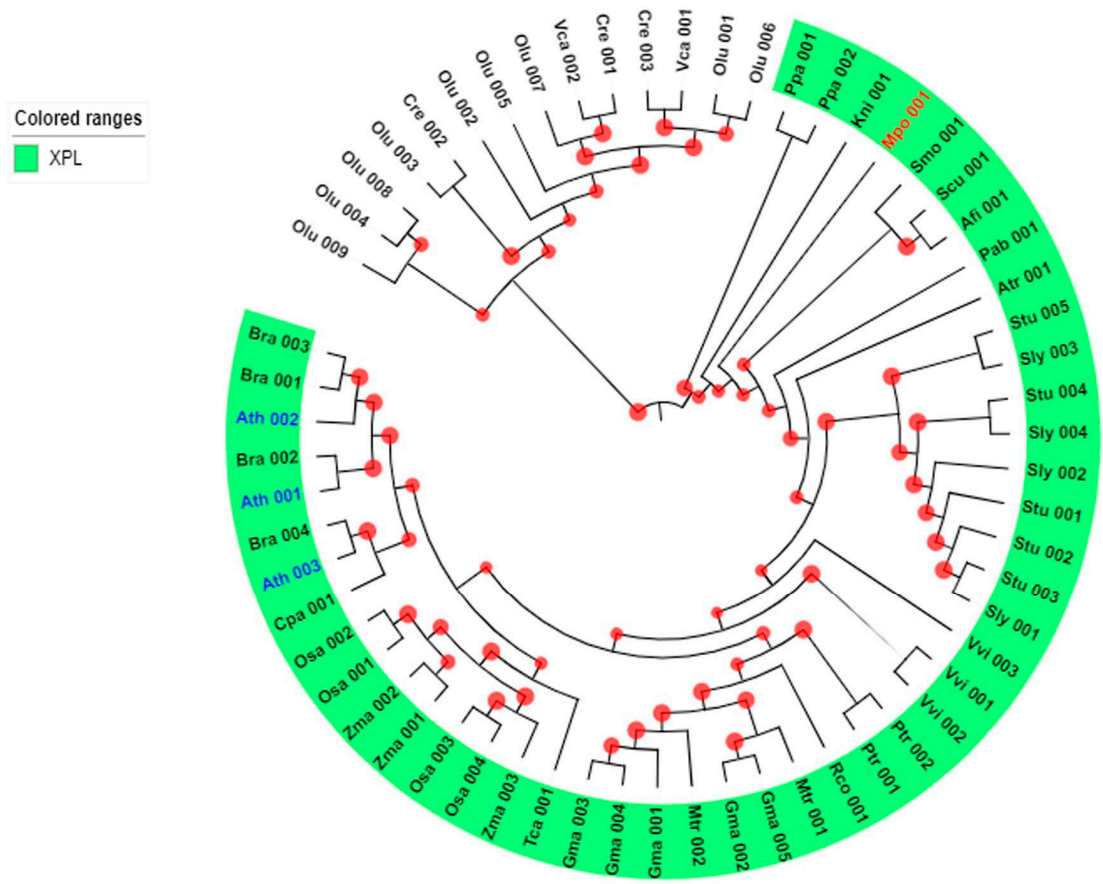

**Figure 10S.- Phylogenetic reconstruction of the XPL** (PROT-JTT-I-F 1000 bootstrap replicates). The phylogenetic reconstruction shows two clades, one for the chlorophyte genomes and other in green for the streptophytes. Labels of *A. thaliana* are colored in blue and *M. polymorpha* label is in red. The bootstrap support values have been shown in red circle, in a range from 60-100% which correlates with circle size.

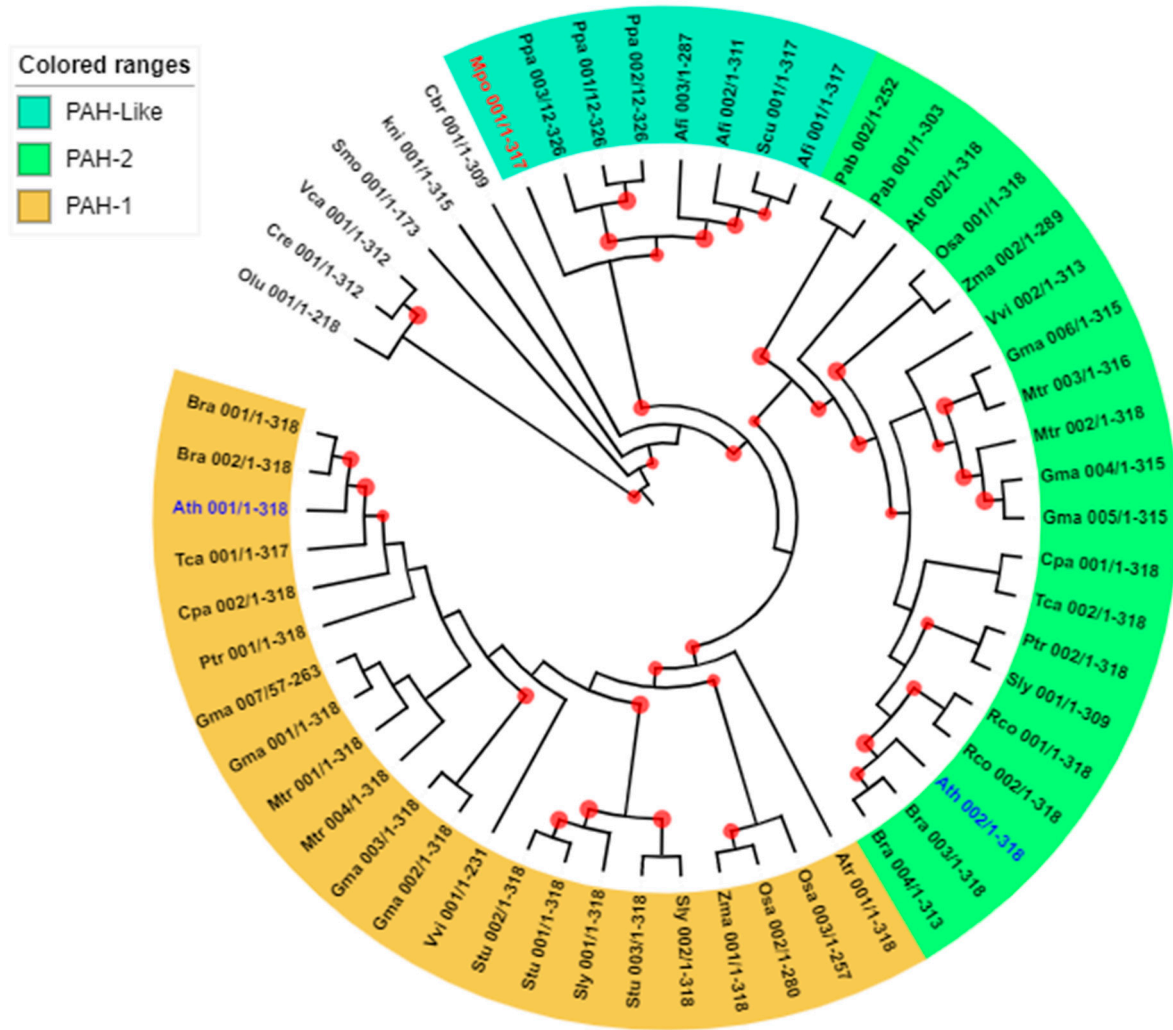

**Figure 11S.- Phylogenetic reconstruction of the PAH** (PROT-JTT-I-F 1000 bootstrap replicates). The phylogenetic reconstruction shows two sister clades for the *AtPAH1* and *AtPAH2* in yellow and green ,respectively. the *MpPAH* forms another clade with sequences from bryophytes, early divergent vascular plants, in blue. Labels of *A. thaliana* are colored in blue and *M. polymorpha* label is in red. The bootstrap support values have been shown in red circle, in a range from 60-100% which correlates with circle size.

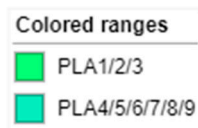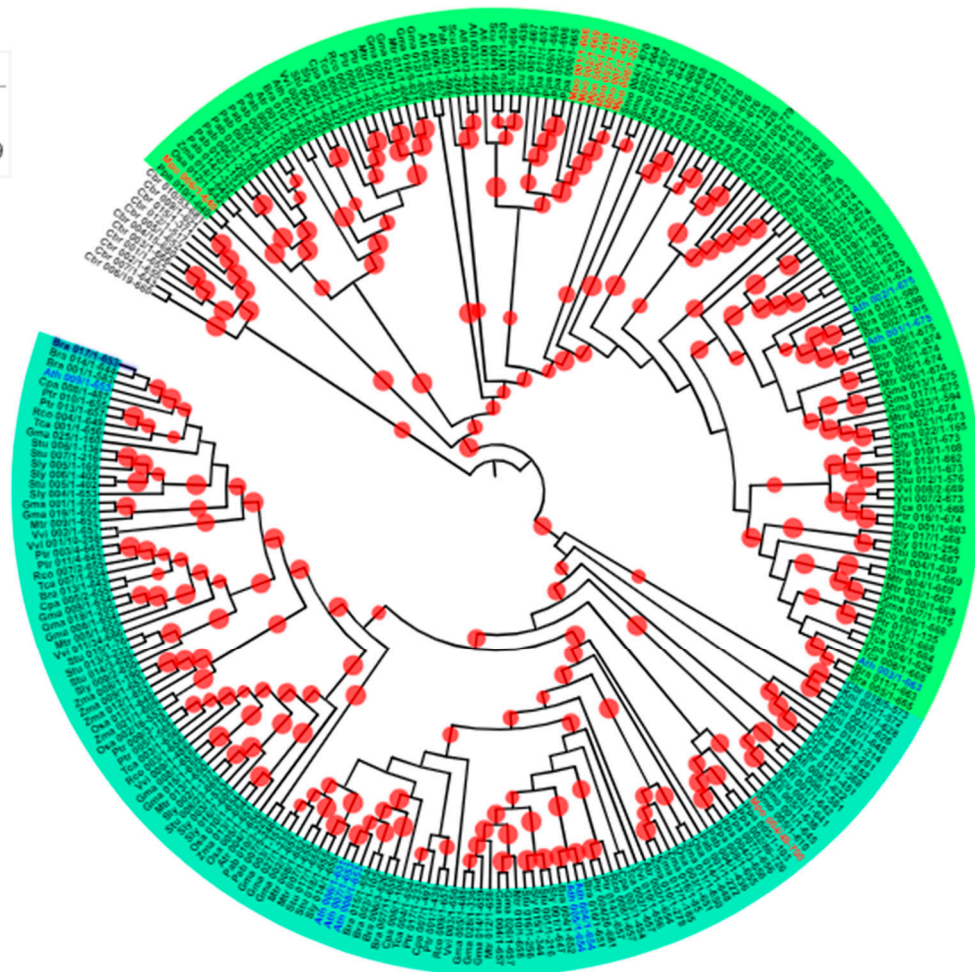

**Figure 12S.- Phylogenetic reconstruction of the PLA** (PROT-JTT-I-F 1000 bootstrap replicates). The phylogenetic reconstruction shows two sister clades for the *AtPLA1/2/3* and *AtPA4/5/6/7/8/9* in green and blue ,respectively. Labels of *A. thaliana* are colored in blue and *M. polymorpha* label is in red. The bootstrap support values have been shown in red circle, in a range from 60-100% which correlates with circle size.

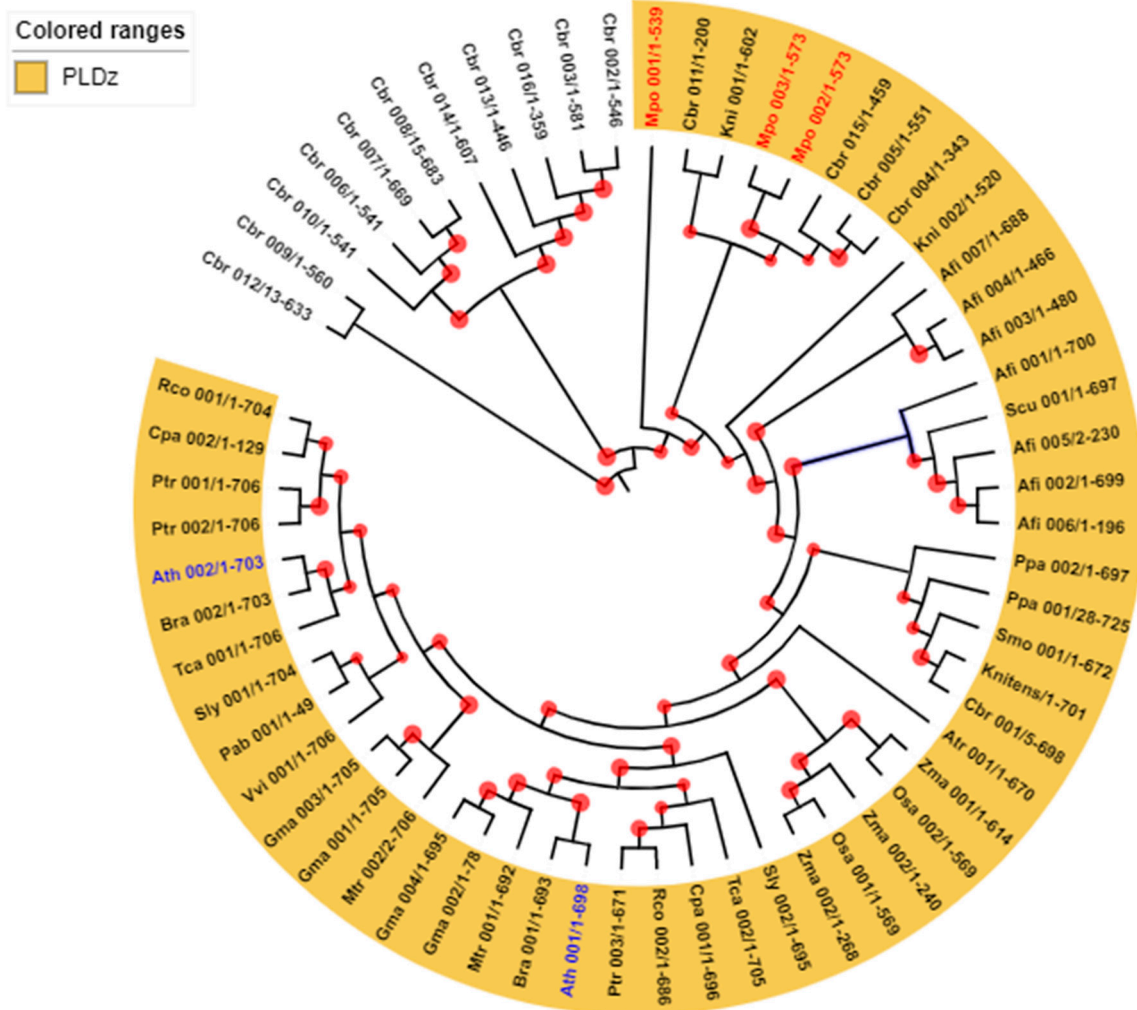

**Figure 13S.- Phylogenetic reconstruction of the PLDz** (PROT-JTT-I-F 1000 bootstrap replicates). The phylogenetic reconstruction shows two sister clades for the *AtPLDs1/2/3* and *AtPA4/5/6/7/8/9* in green and blue ,respectively. Labels of *A. thaliana* are colored in blue and *M. polymorpha* label is in red. The bootstrap support values have been shown in red circle, in a range from 60-100% which correlates with circle size.

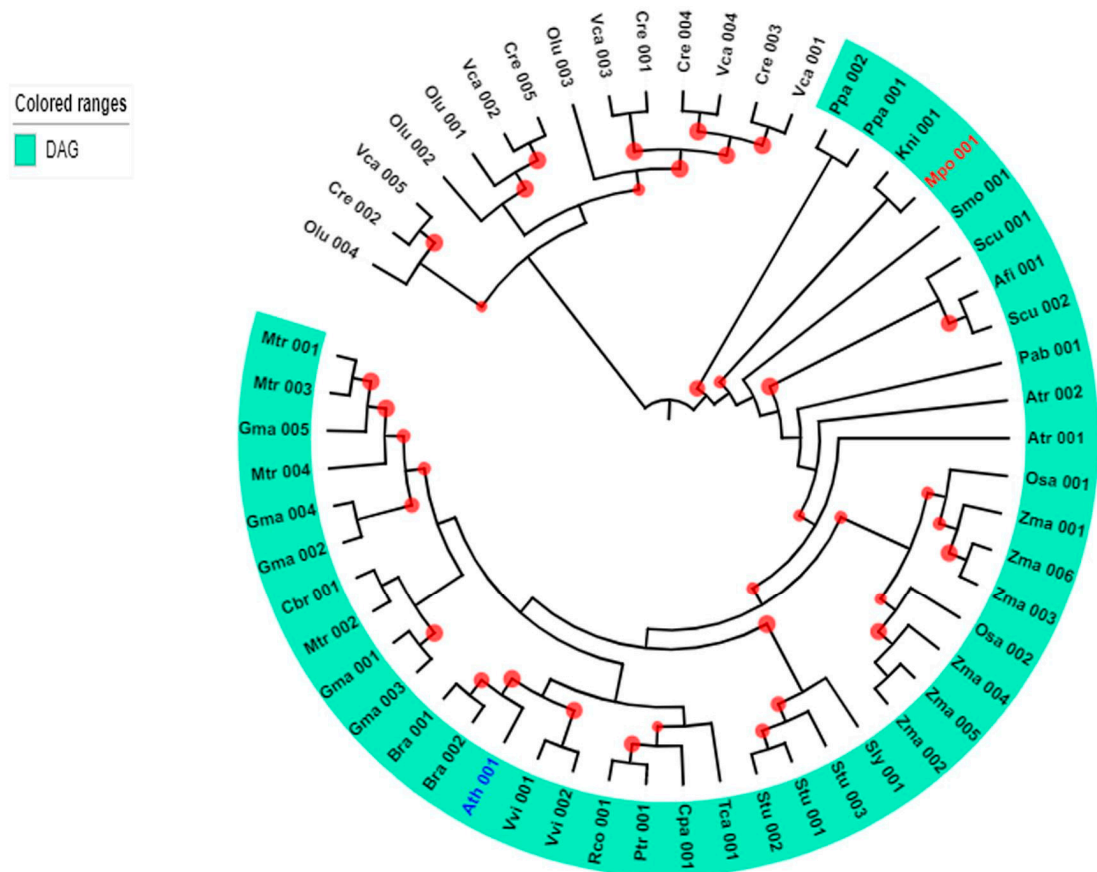

**Figure 14S.- Phylogenetic reconstruction of the DAG** (PROT-JTT-I-F 1000 bootstrap replicates). The phylogenetic reconstruction for DAG shows two clades, chlorophytes and streptophytes (Blue) respectively. Labels of *A. thaliana* are colored in blue and *M. polymorpha* label is in red. The bootstrap support values have been shown in red circle, in a range from 60-100% which correlates with circle size.

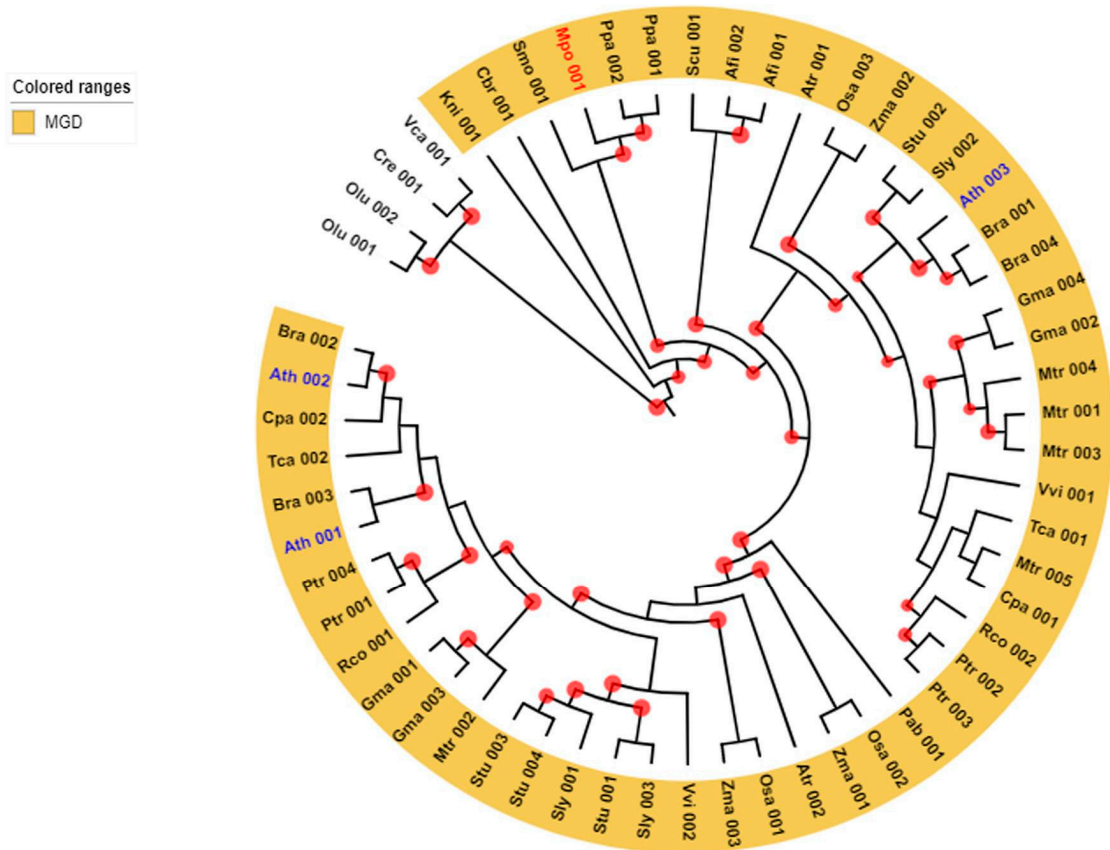

**Figure 15S.- Phylogenetic reconstruction of the MGD** (PROT-JTT-I-F 1000 bootstrap replicates). The phylogenetic reconstruction clusterize in two clades, one includes sequences from chlorophyte genomes. The other contains the sequences of streptophytes, into the clade, we found two subclades for the flowering plant sequences. Labels of *A. thaliana* are colored in blue and *M. polymorpha* label is in red. The bootstrap support values have been shown in red circle, in a range from 60-100% which correlates with circle size.



Colored ranges  
MGDG

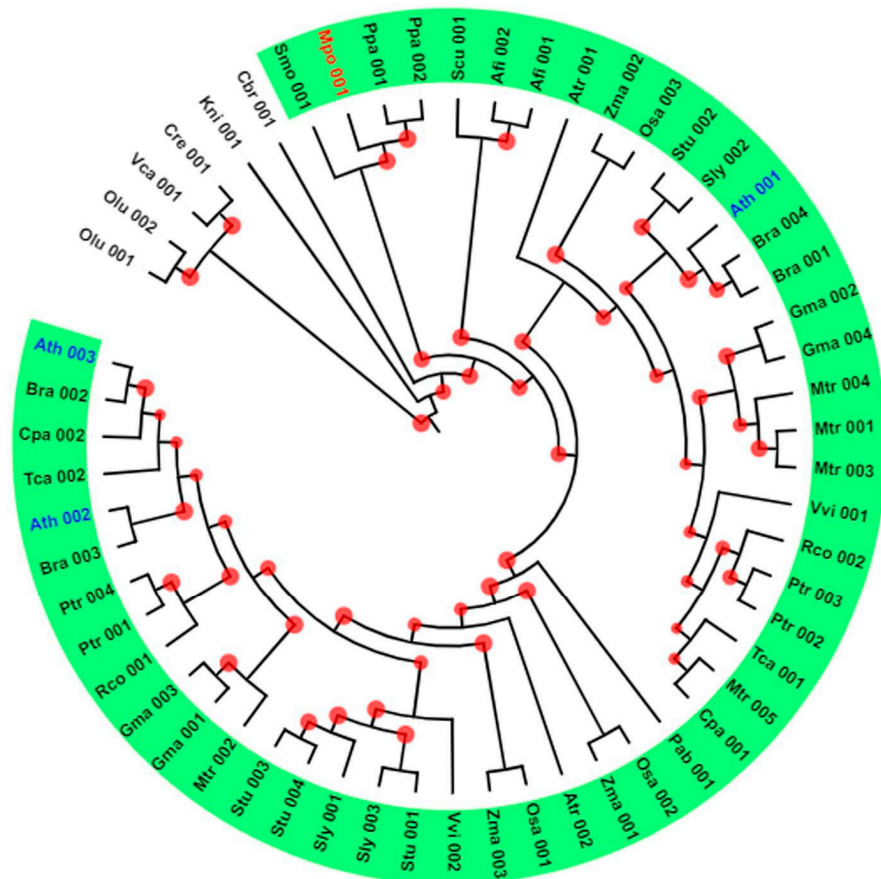

**Figure 17S.- Phylogenetic reconstruction of the MGDG** (PROT-JTT-I-F 1000 bootstrap replicates). The phylogenetic reconstruction clusterize the MGDG sequences of embryophytes in a single clade (green), however the flowering plants form two subclades. Labels of *A. thaliana* are colored in blue and *M. polymorpha* label is in red. The bootstrap support values have been shown in red circle, in a range from 60-100% which correlates with circle size.

Colored ranges  
 SQD

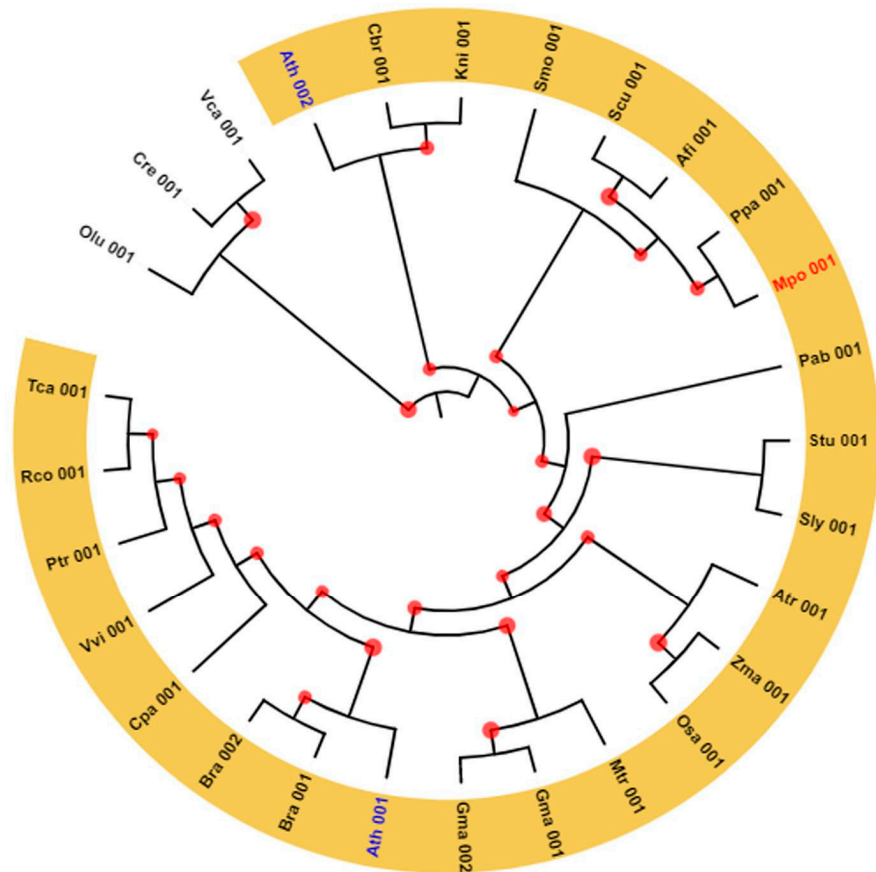

**Figure 18S.- Phylogenetic reconstruction of the SQD** (PROT-JTT-I-F 1000 bootstrap replicates). The phylogenetic reconstruction shows a single clade, for SQD sequences which clusterize according to the species tree. Labels of *A. thaliana* are colored in blue and *M. polymorpha* label is in red. The bootstrap support values have been shown in red circle, in a range from 60-100% which correlates with circle size.

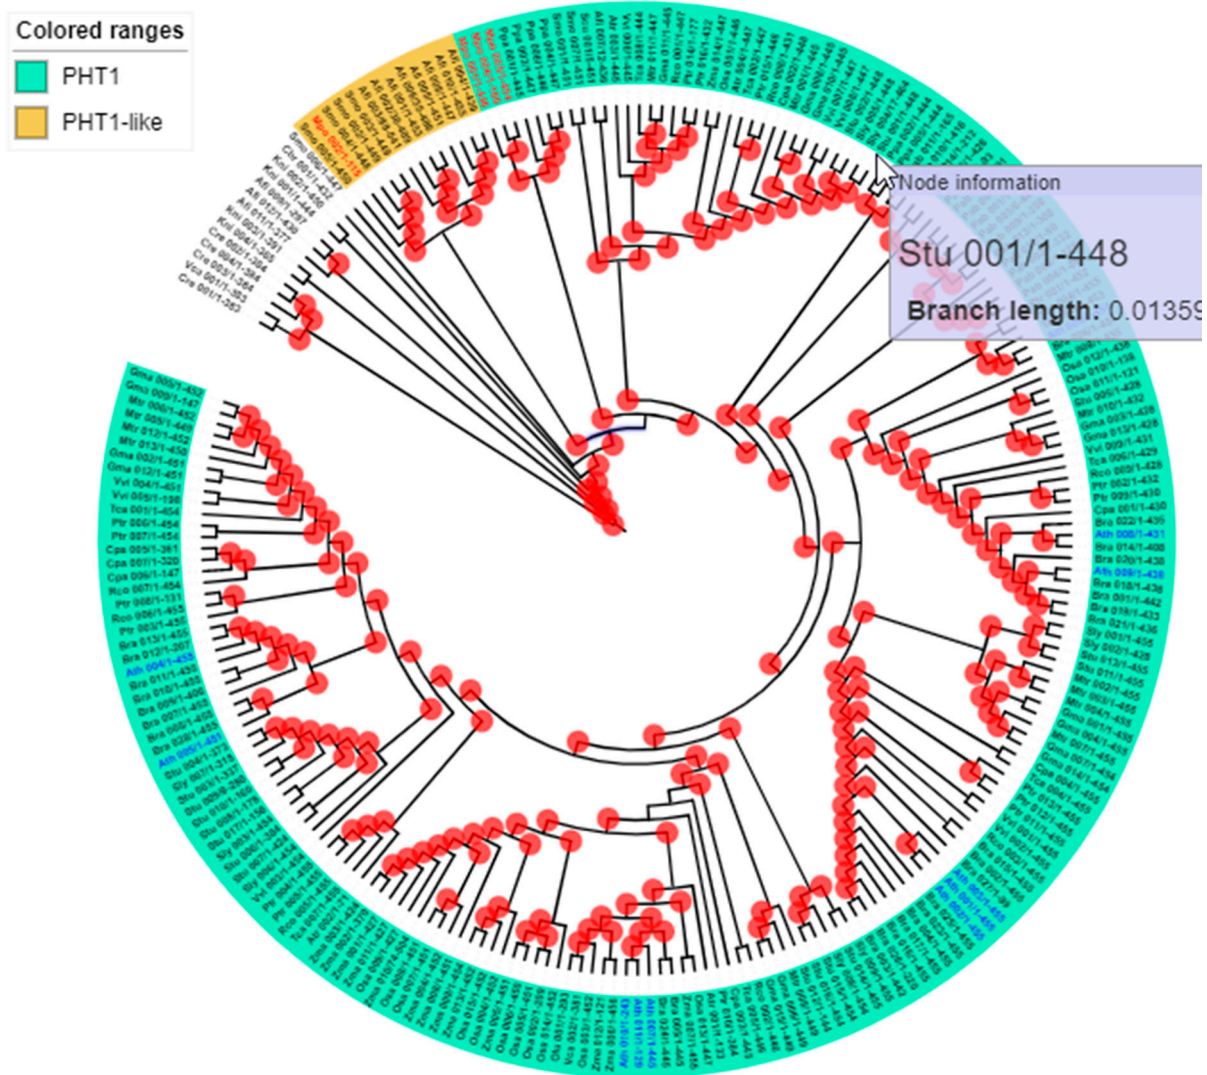

**Figure 19S.- Phylogenetic reconstruction of the PHT** (PROT-JTT-I-F 1000 bootstrap replicates). The phylogenetic reconstruction shows two clades, in blue the PHT1 and in yellow the PHT1-like. *MpPHT1/3/4* belongs to PHT1 clades and *MpPHT2* to PHT1-Like. Labels of *A. thaliana* are colored in blue and *M. polymorpha* label is in red. The bootstrap support values have been shown in red circle, in a range from 60-100% which correlates with circle size.



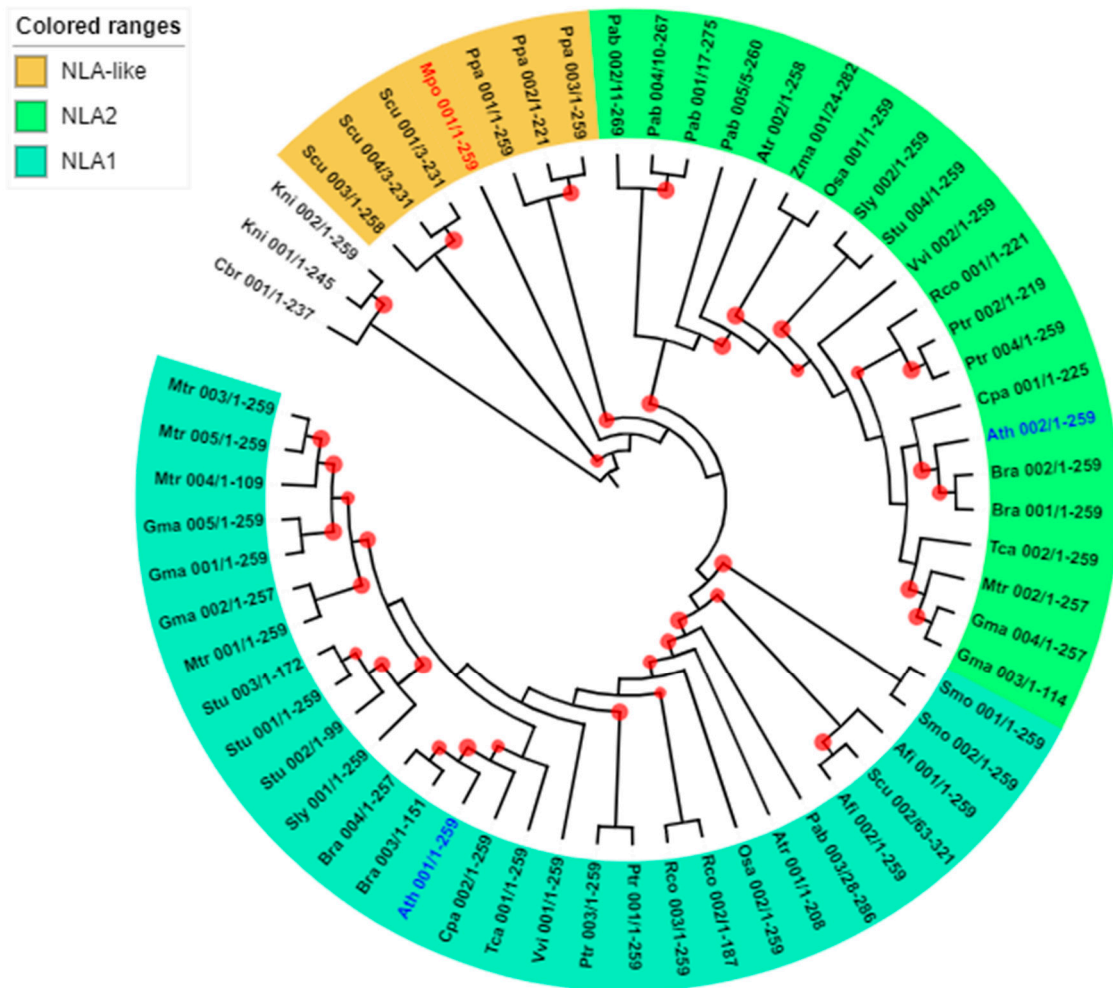

**Figure 21S.- Phylogenetic reconstruction of the NLA** (PROT-JTT-I-F 1000 bootstrap replicates). The phylogenie shows two clades for AtNLA1 and AtNLA2 in blue and green respectively. Also, additional clades named NLA-like (Yellow) contain sequences from bryophytes. Labels of *A. thaliana* are colored in blue and *M. polymorpha* label is in red. The bootstrap support values have been shown in red circle, in a range from 60-100% which correlates with circle size.

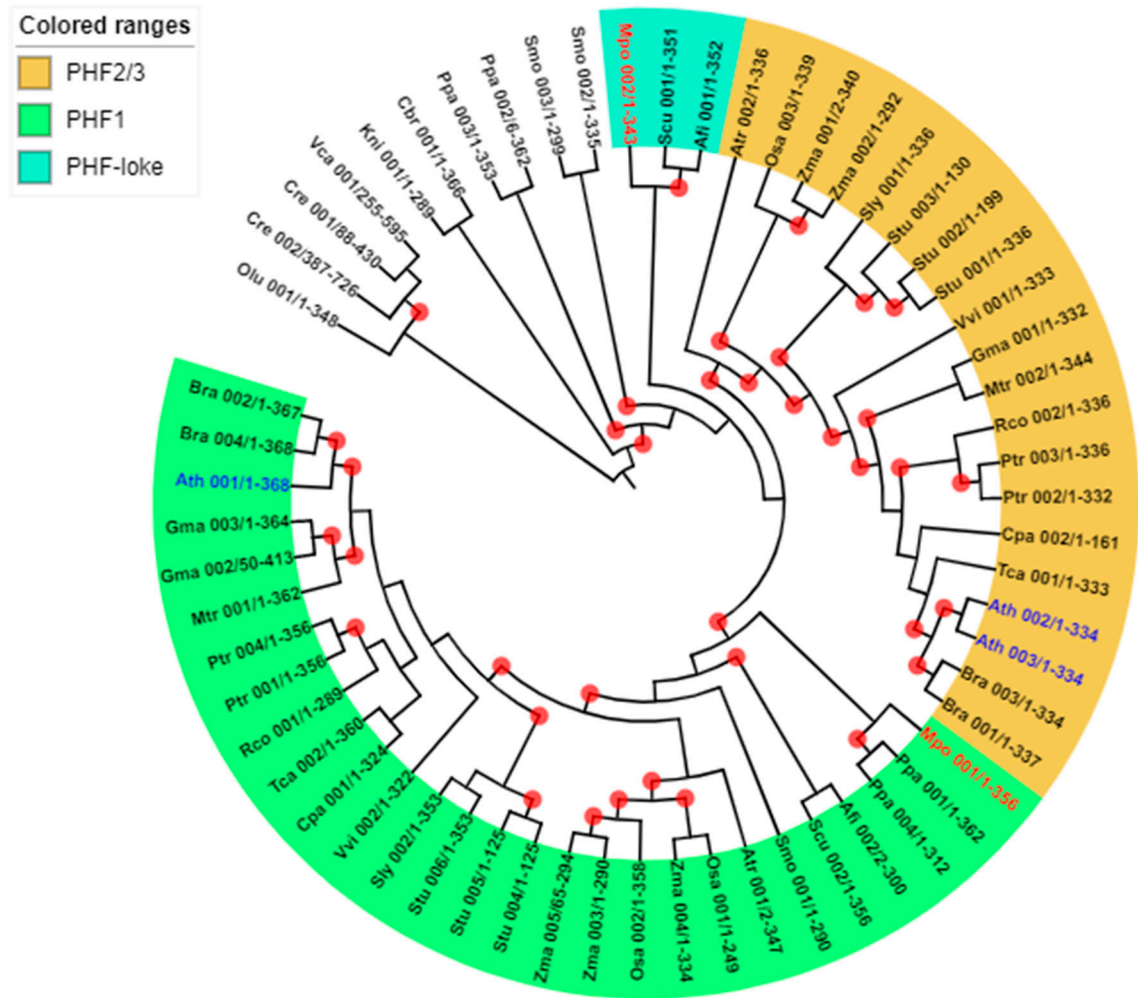

**Figure 22S.- Phylogenetic reconstruction of the PHF** (PROT-JTT-I-F 1000 bootstrap replicates). The phylogeny shows two clades for *AtPHF1* and *AtPHF2/3* in green and yellow respectively. Also, additional clades named *PHF-like* (Blue) contain sequences from bryophytes. *MpPHF1-L* is the most putative orthologous gene of *AtPHF1*. Labels of *A. thaliana* are colored in blue and *M. polymorpha* label is in red. The bootstrap support values have been shown in red circle, in a range from 60-100% which correlates with circle size.

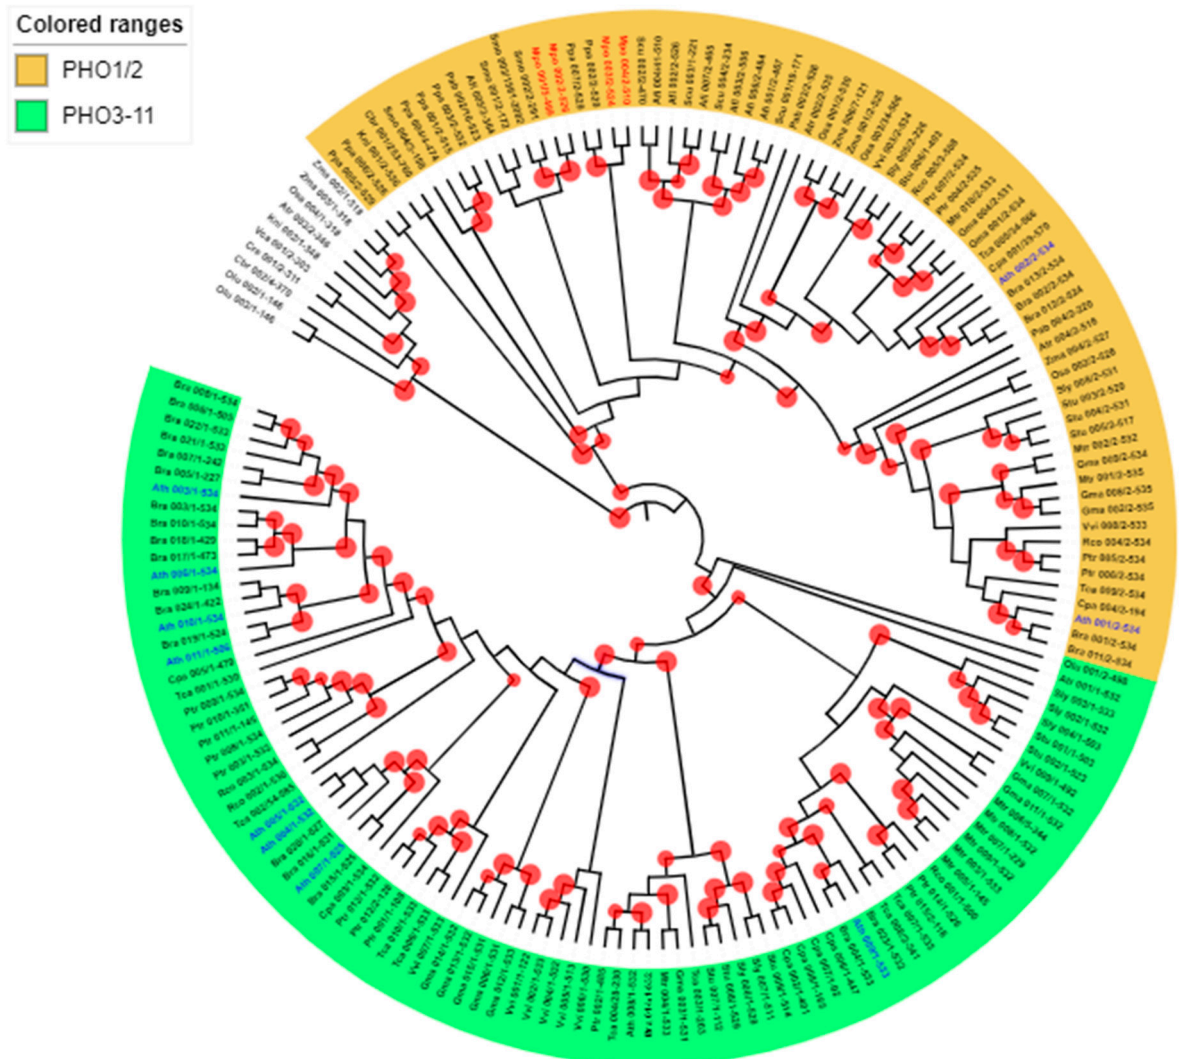

**Figure 23S.- Phylogenetic reconstruction of the PHO1** (PROT-JTT-I-F 1000 bootstrap replicates). The phylogenetic reconstruction clusterize two clades for *AtPHO1/3* and *AtPHO3-11* in yellow and green, respectively. Labels of *A. thaliana* are colored in blue and *M. polymorpha* label is in red. The bootstrap support values have been shown in red circle, in a range from 60-100% which correlates with circle size.

# Colored ranges

- AtPHO2
- AtPHO1
- AtPHO3/4/5
- AtPHO2-like

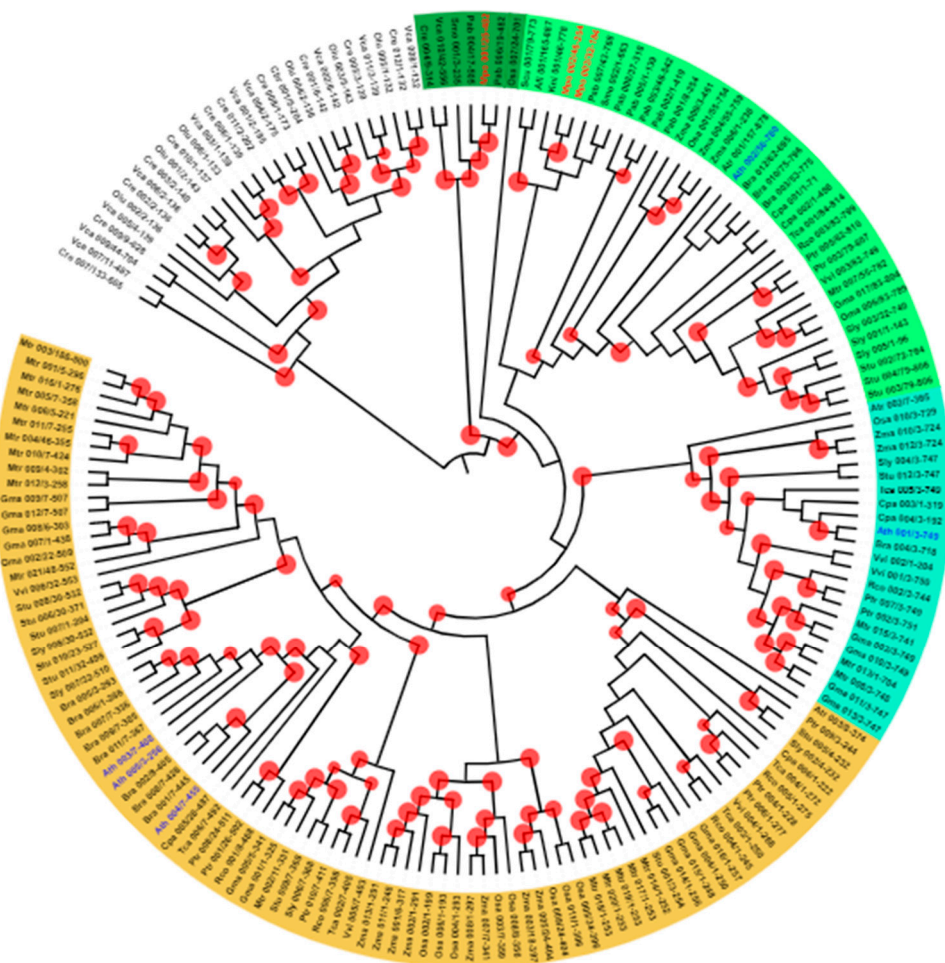

**Figure 24S.- Phylogenetic reconstruction of the PHO2** (PROT-JTT-I-F 1000 bootstrap replicates). The phylogenetic reconstruction clusterize two clades for *AtPHO1/3* and *AtPHO3-11* in yellow and green, respectively. Labels of *A. thaliana* are colored in blue and *M. polymorpha* label is in red. The bootstrap support values have been shown in red circle, in a range from 60-100% which correlates with circle size.

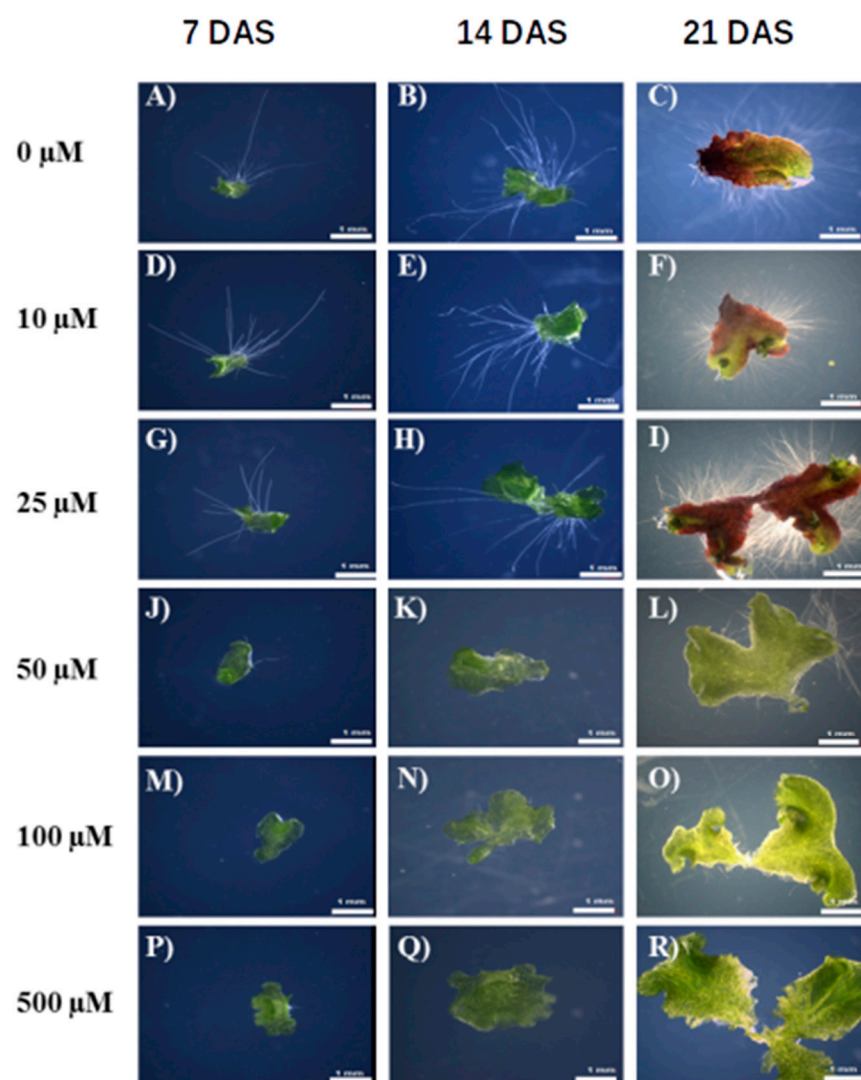

**Supplementary figure 25. Phenotypical response to Pi availability on *marchantia polymorpha*.** We sown gemmae on media MS supplemented with Pi at 0, 10, 25, 50, 100 and 500  $\mu\text{M}$ . The effect of Pi availability on thallus development were registered by photographs at 7, 14 and 21 DAS.

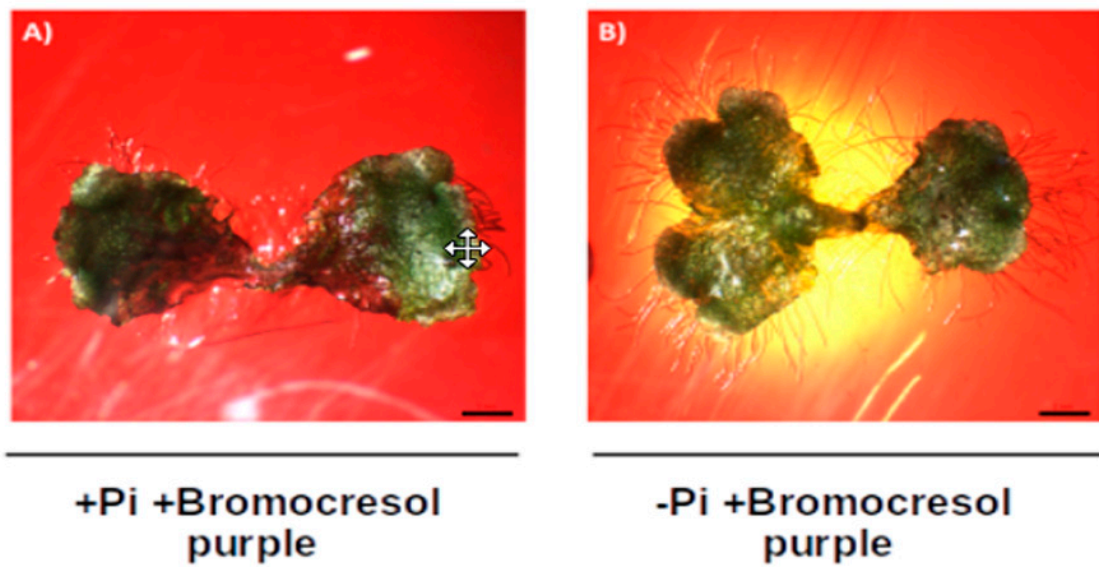

**Supplementary figure 26. *Thallus promotes media acidification under low Pi availability.***  
 We sown gemmae on media MS supplemented with +Pi (500  $\mu$ M) and -Pi (10  $\mu$ M) for 7 days. Then we transfer the thallus to the same medium supplemented with bromocresol purple at 5.7 pH (color red), we incubate overnight and then pictures were taken. A) Showed no change in color indicator for the thallus under +Pi. B) Showed a change from red to yellow which means the acidification in the area behind thallus and rhizoids in response to low Pi.

| MpID(V5.1) | MpID(V3.1)      | Gene     | 12 HPT | 24 HPT | 150 HPT |
|------------|-----------------|----------|--------|--------|---------|
| Mp1g25400  | Mapoly0002s0332 | MpMLS1   | 0      | 0      | 0       |
| Mp6g10540  | Mapoly0016s0095 | MpMLS2   | -1.59  | 1.39   | -1.3    |
| Mp2g11400  | Mapoly0023s0108 | MpMLS3   | -26.86 | -1.8   | -4.88   |
| Mp4g07200  | Mapoly0115s0061 | MpMLS4   | 0      | 0      | 0       |
| Mp8g16290  | Mapoly0154s0035 | MpMLS5   | -16.64 | -1.35  | -3.33   |
| Mp8g09100  | Mapoly0063s0010 | MpCIS1   | 1.04   | -1.91  | 1.35    |
| Mp5g15980  | Mapoly0071s0012 | MpCIS2   | -1.04  | -1.89  | 4.31    |
| Mp8g12790  | Mapoly0083s0041 | MpCIS3   | 0      | 0      | 0       |
| Mp6g21480  | Mapoly0091s0007 | MpCIS4   | 0      | 0      | 0       |
| Mp7g15800  | Mapoly0111s0039 | MpCIS5   | -1.02  | -1.39  | 1.7     |
| Mp8g04310  | Mapoly0200s0007 | MpCIS6   | -4.33  | -35.18 | -25.6   |
| Mp8g04380  | Mapoly0216s0011 | MpCIS7   | 0      | 0      | 0       |
| -          | Mapoly0383s0001 | MpCIS8   | 0      | 0      | 0       |
| Mp8g04980  | Mapoly0383s0002 | MpCIS9   | 0      | 0      | 0       |
| Mp3g01810  | Mapoly0007s0172 | MpALMT1  | 0      | 0      | 0       |
| Mp7g05600  | Mapoly0057s0111 | MpALMT2  | 0      | 0      | 0       |
| Mp4g14650  | Mapoly0070s0016 | MpALMT3  | -1.54  | -1.09  | -1.13   |
| Mp3g25480  | Mapoly0100s0061 | MpALMT4  | -10.13 | -9.58  | -1.43   |
| Mp1g28440  | Mapoly0002s0036 | MpMATE1  | 1.63   | 1.02   | 2.45    |
| Mp7g12320  | Mapoly0003s0243 | MpMATE2  | 0      | 0      | 0       |
| Mp1g04370  | Mapoly0005s0170 | MpMATE3  | 1.08   | 1.05   | 2.66    |
| Mp1g11450  | Mapoly0014s0081 | MpMATE4  | -1.16  | -1.83  | 2.06    |
| Mp6g11640  | Mapoly0016s0203 | MpMATE5  | 0      | 0      | 0       |
| Mp3g05110  | Mapoly0022s0017 | MpMATE6  | 1.07   | 1.22   | -2.56   |
| Mp3g04300  | Mapoly0022s0101 | MpMATE7  | 0      | 0      | 0       |
| Mp1g16390  | Mapoly0033s0021 | MpMATE8  | -4.33  | -3.43  | 3.03    |
| Mp4g18440  | Mapoly0041s0125 | MpMATE9  | -1.51  | -1.3   | -1.84   |
| Mp4g18470  | Mapoly0041s0128 | MpMATE10 | 1.96   | 1.06   | 9.19    |
| Mp6g15320  | Mapoly0056s0043 | MpMATE11 | -1.22  | -1.7   | 1.4     |
| Mp2g22500  | Mapoly0072s0081 | MpMATE12 | 0      | 0      | 0       |
| Mp5g00270  | Mapoly0078s0029 | MpMATE13 | 0      | 0      | 0       |
| Mp6g21080  | Mapoly0091s0047 | MpMATE14 | -1.07  | -1.05  | 1.68    |
| Mp6g02120  | Mapoly0248s0004 | MpMATE15 | 1.67   | -2.42  | 6.81    |

**Supplementary figure 27. Transcriptional regulation of genes involved in organic acid biosynthesis and exudation.** The heatmap shows the transcriptional profile in log2FC of genes involved in malate/citrate synthase and transport. Orange color represents up regulated genes, black no change genes and blue means down regulated genes under Pi starvation.

| <b>MpID(5.1)</b> | <b>MpID(V3.1)</b> | <b>Gene</b> | <b>12 HPT</b> | <b>24 HPT</b> | <b>150 HPT</b> |
|------------------|-------------------|-------------|---------------|---------------|----------------|
| Mp2g23410        | Mapoly0191s0011   | MpPLD1      | 1.52          | 1.04          | 6.13           |
| Mp7g11840        | Mapoly0003s0195   | MpPLD2      | -1.07         | -1.64         | 1.06           |
| Mp7g11840        | Mapoly0003s0195   | MpPLD3      | -1.07         | -1.64         | 1.06           |
| Mp1g07530        | Mapoly0043s0145   | MpPLD4      | 0             | 0             | 2.66           |
| Mp5g16720        | Mapoly0117s0034   | MpPLD5      | 1.95          | 1.36          | -1.53          |
| Mp2g18270        | Mapoly0177s0006   | MpPLD6      | 0             | 0             | 0              |
| Mp1g19150        | Mapoly0001s0253   | MpPLD7      | -2.08         | -6.42         | -1.26          |
| Mp2g17310        | Mapoly0353s0001   | MpPLD8      | 0             | 0             | 0              |
| Mp2g17320        | Mapoly4085s0001   | MpPLD9      | 2.49          | -1.44         | -1.52          |
| Mp2g10950        | Mapoly0023s0061   | MpMGDG      | 0             | 0             | 0              |
| Mp5g12930        | Mapoly0092s0015   | MpDGDG      | 0             | 0             | 0              |
| Mp3g04330        | Mapoly0022s0098   | MpDAG       | -1.28         | -1.08         | 1.66           |
| Mp5g24070        | Mapoly0010s0049   | MpSQD       | 1.62          | 1.35          | -2.43          |
| Mp3g23340        | Mapoly0024s0110   | MpXPL       | 1.16          | -1            | -2.25          |
| Mp3g21770        | Mapoly0089s0039   | MpPAH       | -1.21         | 1.44          | 1.27           |

**Supplementary figure 28. Transcriptional regulation of genes involved in lipid turnover.** The heatmap shows the transcriptional profile in log2FC of genes involved in phospholipid degradation and sulpholipid/galactolipid synthesis. Orange color represents up regulated genes, black no change genes and blue means down regulated genes under Pi starvation.

| <b>MpID(V5.1)</b> | <b>MpID(V3.1)</b> | <b>12 HPT</b> | <b>24 HPT</b> | <b>150 HPT</b> |
|-------------------|-------------------|---------------|---------------|----------------|
| Mp8g16260         | Mapoly0154s0038   | -7.84         | -1.1          | -1.1           |
| Mp5g01660         | Mapoly1623s0001   | -1.26         | -4.97         | -4.72          |
| Mp3g16820         | Mapoly0039s0113   | -1.19         | -2.97         | -1.42          |
| Mp5g17110         | Mapoly0196s0013   | -2.56         | -3.27         | -58.06         |
| Mp5g10730         | Mapoly0048s0001   | -12.6         | -15.51        | -10.03         |
| Mp5g17030         | Mapoly0117s0003   | -5.05         | -3.63         | -15.49         |
| Mp5g17250         | Mapoly0182s0024   | -3.82         | -3.42         | -65.73         |
| Mp5g17480         | Mapoly0182s0001   | -1.22         | -3.05         | -4.29          |
| Mp5g13830         | Mapoly0032s0073   | -4.12         | -21.66        | -1.13          |
| Mp5g17260         | Mapoly0182s0023   | -4.27         | -4.7          | -16.67         |
| Mp7g14900         | Mapoly0009s0175   | -1.05         | -2.29         | -7.29          |
| Mp6g18300         | Mapoly0038s0040   | -1.54         | -4.92         | -4.62          |
| Mp5g14530         | Mapoly0032s0145   | -3.45         | -12.16        | -1.57          |
| Mp5g13820         | Mapoly0032s0072   | -2.84         | -3.04         | -30.14         |
| Mp5g17150         | Mapoly0196s0010   | -1.59         | -5.7          | -3.59          |
| Mp7g14950         | Mapoly2709s0001   | -1.23         | -2.21         | -5.91          |
| Mp5g06870         | Mapoly0136s0035   | -4.23         | -9.85         | -17.29         |
| Mp4g14270         | Mapoly0070s0055   | -2.3          | -3.15         | -6.02          |
| Mp3g18420         | Mapoly0486s0001   | -1.99         | -12.75        | -7.76          |
| Mp5g07230         | Mapoly0332s0001   | -4.71         | -70.54        | -5.73          |
| Mp7g09310         | Mapoly0068s0084   | -1.48         | -2.94         | -2             |
| Mp5g17590         | Mapoly0084s0011   | -1.28         | -6.77         | -4.92          |
| Mp5g02850         | Mapoly0124s0038   | -1.68         | -11.45        | -3.25          |
| Mp3g18410         | Mapoly0341s0001   | -1.61         | -9.17         | -9.85          |
| Mp2g20950         | Mapoly0040s0117   | 1.59          | -4.81         | -1.28          |
| Mp8g01720         | Mapoly0064s0027   | 1.15          | -1.38         | -1.87          |
| Mp5g13790         | Mapoly0032s0069   | 1.81          | -2.03         | -6.18          |
| Mp6g13510         | Mapoly0047s0002   | 2.8           | -1.48         | -1.52          |
| Mp5g13650         | Mapoly0032s0056   | 1.2           | -5.1          | -3.22          |

|           |                 |       |        |        |
|-----------|-----------------|-------|--------|--------|
| Mp5g01710 | Mapoly0161s0033 | 1.82  | -5.85  | -9.74  |
| Mp5g03300 | Mapoly0133s0056 | 2.23  | -1.95  | -1.87  |
| Mp5g13710 | Mapoly0032s0061 | 1.43  | -2.1   | -2.71  |
| Mp4g13870 | Mapoly0070s0094 | 1.95  | -3.42  | -1.2   |
| Mp5g01640 | Mapoly0175s0024 | 1.4   | -1.3   | -10.4  |
| Mp5g12120 | Mapoly0143s0041 | 1.05  | -5.14  | -1.21  |
| Mp5g04320 | Mapoly0243s0001 | 1.42  | -2.77  | -4.71  |
| Mp5g03200 | Mapoly0124s0003 | 3.86  | -7.82  | -1.88  |
| Mp5g04290 | Mapoly0992s0001 | 3.24  | -11.48 | -15.68 |
| Mp5g01630 | Mapoly0175s0023 | 2.35  | -2.28  | -3.07  |
| Mp3g22000 | Mapoly0089s0017 | 1.12  | -3.58  | -6.7   |
| Mp5g17140 | Mapoly0196s0011 | 1.33  | -4.9   | -2.57  |
| Mp6g13520 | Mapoly0047s0003 | 2.08  | -1.69  | -7.1   |
| Mp5g12110 | Mapoly0143s0040 | 1.44  | -1.43  | -1.76  |
| Mp5g02520 | Mapoly0147s0045 | 1.6   | -4.37  | -6.88  |
| Mp5g13840 | Mapoly0032s0074 | 1.24  | -3.26  | -2.92  |
| Mp2g00410 | Mapoly0562s0001 | 1.57  | -2.3   | -2.07  |
| Mp6g13550 | Mapoly0047s0007 | 3.38  | -2.97  | -1.19  |
| Mp5g14500 | Mapoly0032s0143 | 1.06  | -3.24  | -1.55  |
| Mp2g19200 | Mapoly0128s0034 | 1.21  | -34.97 | -4.07  |
| Mp6g13320 | Mapoly0059s0017 | -1.12 | 1.13   | -2.65  |
| Mp8g09900 | Mapoly0008s0232 | -1.86 | -4.62  | 2.68   |
| Mp7g07630 | Mapoly0076s0031 | -1.46 | -1.22  | 1.62   |
| Mp8g07500 | Mapoly0013s0043 | -1.13 | -22.01 | 2.76   |
| Mp5g02840 | Mapoly0124s0039 | -1.26 | -9.94  | 1.36   |
| Mp5g10690 | Mapoly0048s0003 | -1.07 | -4.28  | 2.42   |
| Mp2g19250 | Mapoly0055s0126 | -1.11 | -14.83 | 3.63   |
| Mp7g13980 | Mapoly0009s0083 | -1.07 | 1.06   | 2.48   |
| Mp3g15330 | Mapoly0004s0139 | -4.56 | 1.04   | 4.42   |
| Mp1g06830 | Mapoly0043s0075 | 2.1   | 2.68   | -2.93  |
| Mp3g05740 | Mapoly0006s0045 | 3.25  | 1.48   | -1.43  |
| Mp1g12440 | Mapoly0019s0014 | 1.74  | 1.27   | -1.77  |
| Mp3g12240 | Mapoly0050s0029 | 2.06  | 1.75   | -5.36  |
| Mp3g12230 | Mapoly0050s0028 | 1.59  | 1.27   | -2.77  |
| Mp2g08960 | Mapoly0015s0180 | 1.62  | 1.17   | -1.33  |

|           |                 |       |        |        |
|-----------|-----------------|-------|--------|--------|
| Mp5g04000 | Mapoly0141s0008 | 2.32  | 1.49   | -2.12  |
| Mp7g02680 | Mapoly0088s0020 | 1.18  | -1.05  | 2.2    |
| Mp5g14510 | Mapoly0032s0144 | 1.93  | -1.04  | 3.68   |
| Mp8g01700 | Mapoly0064s0029 | 1.26  | -2.83  | 11.86  |
| Mp2g19210 | Mapoly0128s0035 | 1.48  | -19.37 | 2.35   |
| Mp5g14490 | Mapoly0032s0142 | 1.58  | -3.8   | 3.85   |
| Mp2g19260 | Mapoly0128s0033 | 1.38  | -39.63 | 1.07   |
| Mp5g17600 | Mapoly0084s0012 | 5.82  | -6.42  | 2.18   |
| Mp5g07120 | Mapoly0136s0009 | 4.65  | -1.51  | 21.22  |
| Mp7g19380 | Mapoly0067s0040 | 3.06  | -1.74  | 3.87   |
| Mp4g05810 | Mapoly0087s0010 | 1.48  | -1.88  | 8.98   |
| Mp3g20340 | Mapoly0258s0001 | 1.02  | -1.07  | 1.9    |
| Mp5g10700 | Mapoly0048s0002 | 1.56  | -2.69  | 22.67  |
| Mp4g14580 | Mapoly0070s0023 | 1.85  | -1.87  | 1.51   |
| Mp8g17560 | Mapoly0030s0090 | 1.35  | 1.05   | 1.82   |
| Mp3g20400 | Mapoly0149s0005 | 2.12  | 1.47   | 1.04   |
| Mp3g15810 | Mapoly0004s0091 | 4.55  | 2.28   | 1.49   |
| Mp4g16740 | Mapoly0054s0141 | 2.48  | 2.15   | 3.21   |
| Mp3g15800 | Mapoly0004s0092 | 12.96 | 2.81   | 3.26   |
| Mp7g15000 | Mapoly0009s0184 | 2.5   | 1.33   | 6.04   |
| Mp8g09590 | Mapoly0008s0265 | 7.25  | 2.84   | 2.02   |
| Mp7g15010 | Mapoly0009s0185 | 20.56 | 4.7    | 102.52 |
| Mp3g15790 | Mapoly0004s0093 | 7.57  | 3.71   | 1.92   |
| Mp7g07600 | Mapoly0076s0034 | 1.11  | 1.14   | 2.92   |
| Mp7g19390 | Mapoly0067s0039 | 2.4   | 1.05   | 52.93  |
| Mp1g09290 | Mapoly0096s0070 | 1.81  | 1.77   | 2.15   |
| Mp7g05770 | Mapoly0057s0094 | 1.18  | 1.55   | 1      |
| Mp5g04010 | Mapoly0141s0009 | 5.71  | 2.76   | 2.08   |
| Mp3g15780 | Mapoly0004s0094 | 6.39  | 2.56   | 2.21   |
| Mp4g20060 | Mapoly0116s0008 | 3.81  | 0      | 0      |
| Mp2g08710 | Mapoly0015s0156 | 0     | 0      | 50.62  |
| Mp3g25050 | Mapoly0100s0018 | 0     | 0      | 47.44  |
| Mp5g02610 | Mapoly0124s0062 | 0     | -13.69 | 4.93   |
| Mp7g17080 | Mapoly0051s0045 | 0     | -4.35  | 0      |
| Mp5g10750 | Mapoly0417s0001 | -2.15 | -2.91  | 0      |
| Mp5g12140 | Mapoly0143s0043 | -1.5  | -5.15  | 0      |

**Supplementary figure 29. Transcriptional regulation of peroxidases (MpPRXs) genes.** The heatmap shows the transcriptional profile in log2FC of MpPRXs genes involved in ROS signaling. Orange color represents up regulated genes, black no change genes and blue means down regulated genes under Pi starvation.

| MpID(V5.1) | MpID(V3.1)      | Gene   | 12 HPT | 24 HPT | 150 HPT |
|------------|-----------------|--------|--------|--------|---------|
| Mp3g20340  | Mapoly0258s0001 | MpNOX1 | 1.02   | -1.07  | 1.9     |
| Mp7g00270  | Mapoly0046s0097 | MpNOX2 | -11.36 | -5.63  | -2.77   |

**Supplementary figure 30. Transcriptional regulation of NADPH oxidase (MpNOXs) genes.**

The heatmap shows the transcriptional profile in log2FC of *MpNOXs* genes involved in ROS signaling. Orange color represents up regulated genes, black no change genes and blue means down regulated genes under Pi starvation. Mapoly0046s0097

| MpID(V5.1) | MpID(V3.1)      | Description                            | 12 HPT | 24 HPT | 150 HPT |
|------------|-----------------|----------------------------------------|--------|--------|---------|
| Mp5g19050  | Mapoly0073s0038 | MYB14                                  | -1.03  | -2.04  | 7.01    |
| Mp2g05850  | Mapoly0021s0041 | PPO (aurone synthase candidate)        | 1.14   | 1.17   | 1.56    |
| Mp1g05200  | Mapoly0005s0088 | Phenylalanine ammonia-lyase-like       | -1.31  | -1.54  | 1.51    |
| Mp5g01410  | Mapoly0175s0004 | Chalcone isomerase-Like                | -1.83  | -2.06  | 1.25    |
| Mp2g07060  | Mapoly0021s0159 | Chalcone synthase                      | -1.52  | -2.46  | 1.79    |
| Mp5g10260  | Mapoly0048s0047 | Shikimate Ohydroxycinnamoyltransferase | 1.17   | -2.71  | 2.22    |
| Mp1g05220  | Mapoly0005s0086 | Phenylalanine ammonia-lyase            | 2.15   | -1.38  | 1.79    |
| Mp8g08700  | Mapoly0063s0049 | Cinnamoyl-CoA reductase                | -1.03  | -4     | 2.57    |
| Mp1g10150  | Mapoly0014s0211 | Phenylalanine ammonia-lyase            | -1.34  | -2.23  | -1.7    |
| Mp5g01150  | Mapoly0197s0009 | Probable flavonoid related CYP450      | 1.93   | 1.19   | 1.65    |
| Mp2g05850  | Mapoly0021s0041 | Polyphenol oxidase                     | 32.92  | -45    | 6.3     |

**Supplementary figure 31. Transcriptional regulation of genes related to aronidin**

**biosynthesis.** The heatmap shows the transcriptional profile under low Pi conditions of several genes involved in the biosynthesis of the auronidins. Orange color represents up regulated genes, black no change genes and blue means down regulated genes under Pi starvation.

| MpID(V5.1) | MpID(V3.1)      | Gene   | Fwd                    | Rev                    |
|------------|-----------------|--------|------------------------|------------------------|
| Mp8g10550  | Mapoly0008s0168 | MpLPR1 | CGACTCGTGCTCGCCATTCTGA | GTGAGCTAGATGAGCACAGCAG |
| Mp1g27550  | Mapoly0002s0123 | MpSPX  | AGCGACTGTTGAAGGAGCAT   | GACCACTCTTTCTCGCTTG    |
| Mp7g11330  | Mapoly0003s0147 | MpPHR1 | CATCCTGGTCGGAGTACGTT   | CTCGGAGGCTGTAAAAGTGC   |
| Mp8g16290  | Mapoly0154s0035 | MpMLS3 | CTAATCGCCCTCCTTTTTTC   | GACCACTCTTTCTCGCTTG    |
| Mp5g21210  | Mapoly0058s0103 | MpCIS1 | AGCGACTGTTGAAGGAGCAT   | GACCACTCTTTCTCGCTTG    |
| Mp6g07050  | Mapoly1011s0001 | MpCLE1 | TATACAGCGGAACAGATGC    | ACCGTCGTAAGACTCGTGCT   |
| Mp5g18050  | Mapoly0084s0052 | MpCLE2 | ACGCATCTCGTGGACTTAGG   | AATCCCCCGTGTTAAGGTC    |
| Mp6g11010  | Mapoly0016s0139 | MpACT1 | CGAGCTTCCCGACGGTCAAG   | ACATGGTCGTTCTCCAGAC    |

**Supplementary figure 32. Table for qPCR primers.** Shows the MpID for both genome version 3.1 and 5.1, gene name and primer sequence used for qPCR validation.
