# Supplementary material for: Transcriptional and Morpho-Physiological Responses of Marchantia polymorpha upon Phosphate Starvation
Source: Int J Mol Sci. 2020 Nov 7;21(21):8354. doi: 10.3390/ijms21218354 (PMC7672586; doi:10.3390/ijms21218354)
Supplement: Supplementary file 1 [file ijms-21-08354-s001.zip]

Archive with 5 entries (5 files):
- Rico-Resendiz, etal 2020_Supplementary-information-fx.pdf
- Supplementary Table S1.xlsx
- Supplementary Table S2.xlsx
- Supplementary Table S3.xlsx
- Supplementary Table S4.xlsx
