# Supplementary material for: Transcriptional and Morpho-Physiological Responses of Marchantia polymorpha upon Phosphate Starvation
Source: Int J Mol Sci. 2020 Nov 7;21(21):8354. doi: 10.3390/ijms21218354 (PMC7672586; doi:10.3390/ijms21218354)
Supplement: Supplementary file 1 [file ijms-21-08354-s001.zip › Supplementary Table S1.xlsx]

## Sheet: Table S1
GO.ID	Term description	p-value
GO:0009735	response to cytokinin	1.8e-14
GO:0015979	photosynthesis	2.6e-13
GO:0010038	response to metal ion	4.9e-13
GO:0009266	response to temperature stimulus	2.2e-09
GO:0006520	cellular amino acid metabolic process	3.8e-08
GO:0009651	response to salt stress	1.1e-07
GO:0009409	response to cold	1.2e-07
GO:0019752	carboxylic acid metabolic process	1.3e-06
GO:0009725	response to hormone	1.7e-06
GO:1902600	hydrogen ion transmembrane transport	6.5e-05
GO:0016053	organic acid biosynthetic process	0.00024
GO:0046394	carboxylic acid biosynthetic process	0.00024
GO:0071806	protein transmembrane transport	0.00099
GO:0006952	defense response	0.00115
GO:0042440	pigment metabolic process	0.00147
GO:0045454	cell redox homeostasis	0.00271
GO:0006518	peptide metabolic process	0.00304
GO:0055114	oxidation-reduction process	0.00389
GO:0010315	auxin efflux	0.00524
GO:0019430	removal of superoxide radicals	0.00658
GO:0019676	ammonia assimilation cycle	0.00658
O:0071450	cellular response to oxygen radical	0.00658
GO:0071451	cellular response to superoxide	0.00658
GO:1990748	cellular detoxification	0.00658
GO:0098542	defense response to other organism	0.00725
GO:0016049	cell growth	0.00759
GO:0009914	hormone transport	0.00906
GO:0060918	auxin transport	0.00906
GO:0006119	oxidative phosphorylation	0.01338
GO:0015977	carbon fixation	0.01338
GO:0019673	GDP-mannose metabolic process	0.01338
GO:0070726	cell wall assembly	0.01338
GO:0071668	plant-type cell wall assembly	0.01338
GO:0016036	cellular response to phosphate starvation	0.0149
GO:0098660	inorganic ion transmembrane transport	0.0195
GO:0000303	response to superoxide	0.02264
GO:0000305	response to oxygen radical	0.02264
GO:0042744	hydrogen peroxide catabolic process	0.02264
GO:1901700	response to oxygen-containing compound	0.02626
GO:0070482	response to oxygen levels	0.02707
GO:0001558	regulation of cell growth	0.03199
GO:0040007	growth	0.03264
GO:0009640	photomorphogenesis	0.03289
GO:0009734	auxin-activated signaling pathway	0.03289
GO:0005987	sucrose catabolic process	0.03515
GO:0007569	cell aging	0.03515
GO:0015729	oxaloacetate transport	0.03515
GO:0043132	NAD transport	0.03515
GO:0051592	response to calcium ion	0.03515
GO:0071423	malate transmembrane transport	0.03515
GO:0090342	regulation of cell aging	0.03515
GO:0065008	regulation of biological quality	0.03581
GO:0030243	cellulose metabolic process	0.03732
GO:0030244	cellulose biosynthetic process	0.03732
GO:0045165	cell fate commitment	0.03732
GO:0006568	tryptophan metabolic process	0.03914
GO:0009753	response to jasmonic acid	0.03935
GO:0009926	auxin polar transport	0.03985
GO:0060560	developmental growth involved in morphogenesis	0.04706
GO:0009714	chalcone metabolic process	0.04874
GO:0009715	chalcone biosynthetic process	0.04874
GO:0010206	photosystem II repair	0.04874
GO:0010769	regulation of cell morphogenesis involved in differentiation	0.04874
GO:2000762	regulation of phenylpropanoid metabolic process	0.04874
GO:0072350	tricarboxylic acid metabolic process	0.04981
Table S1. Gene ontology analysis of up-regulated genes at 12 HPT. The table shows the GO categories into the Biological Process (BP), on the left is the GO:ID, description and on right P value (P < 0.05).
