# Supplementary material for: Transcriptional and Morpho-Physiological Responses of Marchantia polymorpha upon Phosphate Starvation
Source: Int J Mol Sci. 2020 Nov 7;21(21):8354. doi: 10.3390/ijms21218354 (PMC7672586; doi:10.3390/ijms21218354)
Supplement: Supplementary file 1 [file ijms-21-08354-s001.zip › Supplementary Table S2.xlsx]

## Sheet: Table S2
GO.ID	Term	p-value
GO:0015979	photosynthesis	1.7e-30
GO:0009657	plastid organization	1.4e-19
GO:0009628	response to abiotic stimulus	1.2e-17
GO:0009987	cellular process	6.8e-15
GO:0042221	response to chemical	3.2e-14
GO:0009416	response to light stimulus	4.6e-14
GO:0010033	response to organic substance	1.2e-13
GO:0009314	response to radiation	1.3e-13
GO:0009719	response to endogenous stimulus	1.4e-13
GO:0009725	response to hormone	3.4e-13
GO:0019684	photosynthesis, light reaction	5.3e-13
GO:0009658	chloroplast organization	7.7e-13
GO:0065007	biological regulation	8.5e-13
GO:0044237	cellular metabolic process	5.8e-12
GO:0050896	response to stimulus	1.2e-11
GO:0050789	regulation of biological process	2.3e-11
GO:1901700	response to oxygen-containing compound	7.9e-11
GO:0006091	generation of precursor metabolites and energy	3.5e-10
GO:0050794	regulation of cellular process	4.3e-10
GO:0042440	pigment metabolic process	3.2e-09
GO:0044763	single-organism cellular process	3.6e-09
GO:0001101	response to acid chemical	9.9e-09
GO:0009639	response to red or far red light	1.7e-08
GO:0046148	pigment biosynthetic process	1.7e-08
GO:0016108	tetraterpenoid metabolic process	2.1e-08
GO:0016116	carotenoid metabolic process	2.1e-08
GO:0015994	chlorophyll metabolic process	3e-08
GO:0009767	photosynthetic electron transport chain	4.7e-08
GO:0009735	response to cytokinin	4.7e-08
GO:0032501	multicellular organismal process	4.8e-08
GO:0015995	chlorophyll biosynthetic process	5.2e-08
GO:0007275	multicellular organismal development	7.6e-08
GO:0044707	single-multicellular organism process	8.3e-08
GO:0048731	system development	1.4e-07
GO:0019222	regulation of metabolic process	2.8e-07
GO:0048827	phyllome development	3e-07
GO:0033013	tetrapyrrole metabolic process	3.9e-07
GO:0032502	developmental process	4.2e-07
GO:0032544	plastid translation	4.3e-07
GO:0009605	response to external stimulus	5.9e-07
GO:0022900	electron transport chain	6.6e-07
GO:0044767	single-organism developmental process	7.7e-07
GO:0010109	regulation of photosynthesis	1.7e-06
GO:0048856	anatomical structure development	1.8e-06
GO:0006778	porphyrin-containing compound metabolic process	1.9e-06
GO:0033014	tetrapyrrole biosynthetic process	2e-06
GO:0009765	photosynthesis, light harvesting	2.1e-06
GO:0009266	response to temperature stimulus	2.2e-06
GO:0022414	reproductive process	2.5e-06
GO:0016109	tetraterpenoid biosynthetic process	2.6e-06
GO:0016117	carotenoid biosynthetic process	2.6e-06
GO:0003006	developmental process involved in reproduction	2.6e-06
GO:1901566	organonitrogen compound biosynthetic process	3e-06
GO:0009409	response to cold	3.7e-06
GO:0007623	circadian rhythm	3.8e-06
GO:0048511	rhythmic process	3.8e-06
GO:0044249	cellular biosynthetic process	4.4e-06
GO:0009617	response to bacterium	4.6e-06
GO:0048367	shoot system development	4.8e-06
GO:0009791	post-embryonic development	6.3e-06
GO:1901564	organonitrogen compound metabolic process	7.2e-06
GO:0031323	regulation of cellular metabolic process	8.2e-06
GO:0007154	cell communication	1.5e-05
GO:0048608	reproductive structure development	1.6e-05
GO:0061458	reproductive system development	1.6e-05
GO:0065008	regulation of biological quality	1.8e-05
GO:0009889	regulation of biosynthetic process	2e-05
GO:0006720	isoprenoid metabolic process	2.1e-05
GO:0042742	defense response to bacterium	2.4e-05
GO:0006779	porphyrin-containing compound biosynthetic process	2.7e-05
GO:0044711	single-organism biosynthetic process	2.7e-05
GO:0044271	cellular nitrogen compound biosynthetic process	3.1e-05
GO:0044702	single organism reproductive process	3.1e-05
GO:0048513	organ development	3.4e-05
GO:0071241	cellular response to inorganic substance	3.5e-05
GO:0009772	photosynthetic electron transport in photosystem II	4.3e-05
GO:0031326	regulation of cellular biosynthetic process	4.5e-05
GO:0043207	response to external biotic stimulus	4.8e-05
GO:0051707	response to other organism	4.8e-05
GO:0006544	glycine metabolic process	5e-05
GO:0048366	leaf development	6.9e-05
GO:0010035	response to inorganic substance	7e-05
GO:0070887	cellular response to chemical stimulus	7.8e-05
GO:0045036	protein targeting to chloroplast	8.8e-05
GO:0072596	establishment of protein localization to chloroplast	8.8e-05
GO:0072598	protein localization to chloroplast	8.8e-05
GO:0009637	response to blue light	9.5e-05
GO:0009607	response to biotic stimulus	9.8e-05
GO:0017038	protein import	0.00012
GO:0098542	defense response to other organism	0.00013
GO:0016122	xanthophyll metabolic process	0.00013
GO:0006721	terpenoid metabolic process	0.00014
GO:0051704	multi-organism process	0.00014
GO:0010218	response to far red light	0.00015
GO:0034599	cellular response to oxidative stress	0.00015
GO:0080090	regulation of primary metabolic process	0.00015
GO:0009611	response to wounding	0.00015
GO:0009914	hormone transport	0.00016
GO:0060918	auxin transport	0.00016
GO:0009058	biosynthetic process	0.00017
GO:0060255	regulation of macromolecule metabolic process	0.00018
GO:0016043	cellular component organization	0.00019
GO:0044700	single organism signaling	0.00019
GO:0042548	regulation of photosynthesis, light reaction	0.00021
GO:0043467	regulation of generation of precursor metabolites and energy	0.00021
GO:0023052	signaling	0.00021
GO:0009638	phototropism	0.00022
GO:0010206	photosystem II repair	0.00022
GO:0018298	protein-chromophore linkage	0.00022
GO:0048518	positive regulation of biological process	0.00022
GO:0007568	aging	0.00023
GO:0051171	regulation of nitrogen compound metabolic process	0.00023
GO:0007165	signal transduction	0.00025
GO:1901701	cellular response to oxygen-containing compound	0.00026
GO:1901576	organic substance biosynthetic process	0.00027
GO:0033993	response to lipid	0.00028
GO:0009651	response to salt stress	0.0003
GO:0010468	regulation of gene expression	0.00031
GO:0048519	negative regulation of biological process	0.00032
GO:0031328	positive regulation of cellular biosynthetic process	0.00032
GO:0009891	positive regulation of biosynthetic process	0.00034
GO:0008299	isoprenoid biosynthetic process	0.00036
GO:0000302	response to reactive oxygen species	0.00036
GO:0010556	regulation of macromolecule biosynthetic process	0.00037
GO:0097305	response to alcohol	0.00037
GO:0010817	regulation of hormone levels	0.00038
GO:0010114	response to red light	0.00049
GO:0048569	post-embryonic organ development	0.00051
GO:0006536	glutamate metabolic process	0.00053
GO:0009753	response to jasmonic acid	0.00053
GO:0009893	positive regulation of metabolic process	0.00056
GO:0034614	cellular response to reactive oxygen species	0.00073
GO:0071248	cellular response to metal ion	0.00073
GO:0048438	floral whorl development	0.00073
GO:2000112	regulation of cellular macromolecule biosynthetic process	0.00075
GO:0009648	photoperiodism	0.00076
GO:0009642	response to light intensity	0.00079
GO:0048437	floral organ development	0.00079
GO:0009773	photosynthetic electron transport in photosystem I	0.0008
GO:0009926	auxin polar transport	0.00081
GO:0035670	plant-type ovary development	0.00081
GO:0048481	ovule development	0.00081
GO:0006952	defense response	0.00083
GO:0071214	cellular response to abiotic stimulus	0.00089
GO:0071482	cellular response to light stimulus	0.00091
GO:0031325	positive regulation of cellular metabolic process	0.00098
GO:1902580	single-organism cellular localization	0.00101
GO:0009640	photomorphogenesis	0.00102
GO:0009668	plastid membrane organization	0.00102
GO:0010027	thylakoid membrane organization	0.00102
GO:0009313	oligosaccharide catabolic process	0.00111
GO:0009704	de-etiolation	0.00111
GO:0010236	plastoquinone biosynthetic process	0.00111
GO:0015977	carbon fixation	0.00111
GO:0030091	protein repair	0.00111
GO:0071281	cellular response to iron ion	0.00111
GO:0006950	response to stress	0.00111
GO:0010608	posttranscriptional regulation of gene expression	0.00115
GO:0005984	disaccharide metabolic process	0.00116
GO:0006546	glycine catabolic process	0.00118
GO:0009768	photosynthesis, light harvesting in photosystem I	0.00118
GO:0015969	guanosine tetraphosphate metabolic process	0.00118
GO:0034035	purine ribonucleoside bisphosphate metabolic process	0.00118
GO:0051252	regulation of RNA metabolic process	0.00119
GO:0006418	tRNA aminoacylation for protein translation	0.00125
GO:0043038	amino acid activation	0.00125
GO:0043039	tRNA aminoacylation	0.00125
GO:0010150	leaf senescence	0.00127
GO:0010260	organ senescence	0.00127
GO:0016071	mRNA metabolic process	0.00129
GO:0014070	response to organic cyclic compound	0.00141
GO:0048523	negative regulation of cellular process	0.00141
GO:0010118	stomatal movement	0.00141
GO:0006996	organelle organization	0.00142
GO:0006417	regulation of translation	0.00142
GO:0009853	photorespiration	0.00142
GO:0034248	regulation of cellular amide metabolic process	0.00142
GO:0009892	negative regulation of metabolic process	0.00145
GO:0006970	response to osmotic stress	0.00145
GO:0090567	reproductive shoot system development	0.00149
GO:0051186	cofactor metabolic process	0.00163
GO:0051188	cofactor biosynthetic process	0.00167
GO:0009069	serine family amino acid metabolic process	0.00174
GO:0006520	cellular amino acid metabolic process	0.0018
GO:0009645	response to low light intensity stimulus	0.00202
GO:0042214	terpene metabolic process	0.00202
GO:0009414	response to water deprivation	0.00206
GO:0019219	regulation of nucleobase-containing compound metabolic process	0.00215
GO:0009908	flower development	0.00218
GO:0050793	regulation of developmental process	0.00219
GO:0009737	response to abscisic acid	0.00222
GO:1903506	regulation of nucleic acid-templated transcription	0.00228
GO:2001141	regulation of RNA biosynthetic process	0.00228
GO:0071704	organic substance metabolic process	0.00229
GO:0051173	positive regulation of nitrogen compound metabolic process	0.00229
GO:0071478	cellular response to radiation	0.00229
GO:0010207	photosystem II assembly	0.00245
GO:0009606	tropism	0.00253
GO:0048440	carpel development	0.00253
GO:0019216	regulation of lipid metabolic process	0.00255
GO:0048571	long-day photoperiodism	0.00255
GO:0010467	gene expression	0.00277
GO:0045935	positive regulation of nucleobase-containing compound metabolic process	0.00286
GO:0043043	peptide biosynthetic process	0.00294
GO:0048467	gynoecium development	0.00301
GO:0006355	regulation of transcription, DNA-templated	0.00315
GO:0016114	terpenoid biosynthetic process	0.00322
GO:0006606	protein import into nucleus	0.00328
GO:0006879	cellular iron ion homeostasis	0.00328
GO:0016119	carotene metabolic process	0.00328
GO:0044744	protein targeting to nucleus	0.00328
GO:0052482	defense response by cell wall thickening	0.00328
GO:0052544	defense response by callose deposition in cell wall	0.00328
GO:1902593	single-organism nuclear import	0.00328
GO:0009723	response to ethylene	0.00336
GO:0009415	response to water	0.0034
GO:0019725	cellular homeostasis	0.0034
GO:0006412	translation	0.00342
GO:0006402	mRNA catabolic process	0.00343
GO:0051239	regulation of multicellular organismal process	0.00349
GO:0043604	amide biosynthetic process	0.00357
GO:0016049	cell growth	0.00357
GO:0018130	heterocycle biosynthetic process	0.00358
GO:0031324	negative regulation of cellular metabolic process	0.00367
GO:0019538	protein metabolic process	0.00405
GO:0009751	response to salicylic acid	0.00415
GO:0051716	cellular response to stimulus	0.00416
GO:0046890	regulation of lipid biosynthetic process	0.00427
GO:0072348	sulfur compound transport	0.00427
GO:0036293	response to decreased oxygen levels	0.00428
GO:0010119	regulation of stomatal movement	0.0043
GO:0071229	cellular response to acid chemical	0.00432
GO:0051254	positive regulation of RNA metabolic process	0.00434
GO:0005985	sucrose metabolic process	0.00448
GO:1901401	regulation of tetrapyrrole metabolic process	0.00448
GO:0042592	homeostatic process	0.00466
GO:0009643	photosynthetic acclimation	0.00502
GO:0016123	xanthophyll biosynthetic process	0.00502
GO:0019288	isopentenyl diphosphate biosynthetic process, methylerythritol 4-phosphate pathway	0.00502
GO:0045038	protein import into chloroplast thylakoid membrane	0.00502
GO:0046246	terpene biosynthetic process	0.00502
GO:0046352	disaccharide catabolic process	0.00502
GO:0006518	peptide metabolic process	0.0051
GO:0010557	positive regulation of macromolecule biosynthetic process	0.00528
GO:0044272	sulfur compound biosynthetic process	0.00537
GO:0051246	regulation of protein metabolic process	0.0054
GO:0071310	cellular response to organic substance	0.0058
GO:0009793	embryo development ending in seed dormancy	0.00586
GO:2000026	regulation of multicellular organismal development	0.00591
GO:0000079	regulation of cyclin-dependent protein serine/threonine kinase activity	0.00637
GO:0006074	(1->3)-beta-D-glucan metabolic process	0.00637
GO:0006075	(1->3)-beta-D-glucan biosynthetic process	0.00637
GO:0008285	negative regulation of cell proliferation	0.00637
GO:0016144	S-glycoside biosynthetic process	0.00637
GO:0019676	ammonia assimilation cycle	0.00637
GO:0019758	glycosinolate biosynthetic process	0.00637
GO:0019761	glucosinolate biosynthetic process	0.00637
GO:0043200	response to amino acid	0.00637
GO:0045912	negative regulation of carbohydrate metabolic process	0.00637
GO:0048572	short-day photoperiodism	0.00637
GO:0048575	short-day photoperiodism, flowering	0.00637
GO:0051353	positive regulation of oxidoreductase activity	0.00637
GO:0006605	protein targeting	0.00639
GO:0000956	nuclear-transcribed mRNA catabolic process	0.00679
GO:0009067	aspartate family amino acid biosynthetic process	0.00679
GO:0070482	response to oxygen levels	0.00679
GO:0048580	regulation of post-embryonic development	0.00693
GO:0048573	photoperiodism, flowering	0.0074
GO:0006833	water transport	0.00742
GO:0009240	isopentenyl diphosphate biosynthetic process	0.00742
GO:0009583	detection of light stimulus	0.00742
GO:0010380	regulation of chlorophyll biosynthetic process	0.00742
GO:0034504	protein localization to nucleus	0.00742
GO:0042044	fluid transport	0.00742
GO:0046490	isopentenyl diphosphate metabolic process	0.00742
GO:0051170	nuclear import	0.00742
GO:0060321	acceptance of pollen	0.00742
GO:0019438	aromatic compound biosynthetic process	0.00754
GO:0045037	protein import into chloroplast stroma	0.00754
GO:0051640	organelle localization	0.00754
GO:0071446	cellular response to salicylic acid stimulus	0.00754
GO:0046916	cellular transition metal ion homeostasis	0.00793
GO:0090056	regulation of chlorophyll metabolic process	0.00793
GO:0005982	starch metabolic process	0.00833
GO:0043436	oxoacid metabolic process	0.00839
GO:0006807	nitrogen compound metabolic process	0.00858
GO:0044281	small molecule metabolic process	0.00865
GO:0000097	sulfur amino acid biosynthetic process	0.00869
GO:0016070	RNA metabolic process	0.00876
GO:0044255	cellular lipid metabolic process	0.00889
GO:0070727	cellular macromolecule localization	0.00931
GO:0007389	pattern specification process	0.00945
GO:0010228	vegetative to reproductive phase transition of meristem	0.00945
GO:0006886	intracellular protein transport	0.00949
GO:0006082	organic acid metabolic process	0.00953
GO:0006790	sulfur compound metabolic process	0.00965
GO:0045893	positive regulation of transcription, DNA-templated	0.00971
GO:1902680	positive regulation of RNA biosynthetic process	0.00971
GO:1903508	positive regulation of nucleic acid-templated transcription	0.00971
GO:0071840	cellular component organization or biogenesis	0.00975
GO:0009790	embryo development	0.00976
GO:0001558	regulation of cell growth	0.01015
GO:0048522	positive regulation of cellular process	0.01019
GO:0006875	cellular metal ion homeostasis	0.01027
GO:0051606	detection of stimulus	0.01027
GO:0019752	carboxylic acid metabolic process	0.01056
GO:0008152	metabolic process	0.01082
GO:0045454	cell redox homeostasis	0.01088
GO:0010038	response to metal ion	0.01147
GO:0010604	positive regulation of macromolecule metabolic process	0.01187
GO:0040007	growth	0.01191
GO:0009556	microsporogenesis	0.01191
GO:0010017	red or far-red light signaling pathway	0.01191
GO:0043094	cellular metabolic compound salvage	0.01195
GO:0010629	negative regulation of gene expression	0.012
GO:0006873	cellular ion homeostasis	0.01233
GO:0000160	phosphorelay signal transduction system	0.01268
GO:1901362	organic cyclic compound biosynthetic process	0.01269
GO:0008272	sulfate transport	0.01286
GO:0009071	serine family amino acid catabolic process	0.01286
GO:0009641	shade avoidance	0.01286
GO:0051341	regulation of oxidoreductase activity	0.01286
GO:0052325	cell wall pectin biosynthetic process	0.01286
GO:1902170	cellular response to reactive nitrogen species	0.01286
GO:0010605	negative regulation of macromolecule metabolic process	0.01327
GO:0006555	methionine metabolic process	0.0134
GO:0009863	salicylic acid mediated signaling pathway	0.0134
GO:0010039	response to iron ion	0.0134
GO:1902531	regulation of intracellular signal transduction	0.0134
GO:0044419	interspecies interaction between organisms	0.01381
GO:0072594	establishment of protein localization to organelle	0.01388
GO:0000184	nuclear-transcribed mRNA catabolic process, nonsense-mediated decay	0.01416
GO:0001708	cell fate specification	0.01416
GO:0009086	methionine biosynthetic process	0.01416
GO:0046351	disaccharide biosynthetic process	0.01416
GO:0048586	regulation of long-day photoperiodism, flowering	0.01416
GO:0051656	establishment of organelle localization	0.01416
GO:0052542	defense response by callose deposition	0.01416
GO:0098586	cellular response to virus	0.01416
GO:1901463	regulation of tetrapyrrole biosynthetic process	0.01416
GO:0010154	fruit development	0.01427
GO:0034637	cellular carbohydrate biosynthetic process	0.01436
GO:0010628	positive regulation of gene expression	0.01442
GO:0030003	cellular cation homeostasis	0.0149
GO:0040008	regulation of growth	0.01521
GO:0048316	seed development	0.01616
GO:0009755	hormone-mediated signaling pathway	0.01621
GO:0015031	protein transport	0.0167
GO:2000241	regulation of reproductive process	0.01679
GO:0009066	aspartate family amino acid metabolic process	0.017
GO:0006730	one-carbon metabolic process	0.01785
GO:0006787	porphyrin-containing compound catabolic process	0.01785
GO:0033015	tetrapyrrole catabolic process	0.01785
GO:0071489	cellular response to red or far red light	0.01785
GO:0043603	cellular amide metabolic process	0.01806
GO:0009555	pollen development	0.01806
GO:0033692	cellular polysaccharide biosynthetic process	0.01884
GO:0000096	sulfur amino acid metabolic process	0.01921
GO:0009311	oligosaccharide metabolic process	0.01972
GO:0009644	response to high light intensity	0.01972
GO:0022622	root system development	0.02017
GO:0048364	root development	0.02017
GO:0043170	macromolecule metabolic process	0.02043
GO:0001666	response to hypoxia	0.02104
GO:0009756	carbohydrate mediated signaling	0.02104
GO:0009875	pollen-pistil interaction	0.02104
GO:0010182	sugar mediated signaling pathway	0.02104
GO:0033865	nucleoside bisphosphate metabolic process	0.02104
GO:0033875	ribonucleoside bisphosphate metabolic process	0.02104
GO:0034032	purine nucleoside bisphosphate metabolic process	0.02104
GO:0042743	hydrogen peroxide metabolic process	0.02104
GO:0048825	cotyledon development	0.02104
GO:0051193	regulation of cofactor metabolic process	0.02104
GO:0032870	cellular response to hormone stimulus	0.02111
GO:0009059	macromolecule biosynthetic process	0.02121
GO:0043623	cellular protein complex assembly	0.0217
GO:0032268	regulation of cellular protein metabolic process	0.02189
GO:0065009	regulation of molecular function	0.02189
GO:0001887	selenium compound metabolic process	0.02194
GO:0008216	spermidine metabolic process	0.02194
GO:0008295	spermidine biosynthetic process	0.02194
GO:0009903	chloroplast avoidance movement	0.02194
GO:0010105	negative regulation of ethylene-activated signaling pathway	0.02194
GO:0010452	histone H3-K36 methylation	0.02194
GO:0016120	carotene biosynthetic process	0.02194
GO:0019747	regulation of isoprenoid metabolic process	0.02194
GO:0034059	response to anoxia	0.02194
GO:0042549	photosystem II stabilization	0.02194
GO:0070298	negative regulation of phosphorelay signal transduction system	0.02194
GO:0071732	cellular response to nitric oxide	0.02194
GO:1904029	regulation of cyclin-dependent protein kinase activity	0.02194
GO:0045184	establishment of protein localization	0.02233
GO:0009890	negative regulation of biosynthetic process	0.02245
GO:0009867	jasmonic acid mediated signaling pathway	0.02283
GO:0044403	symbiosis, encompassing mutualism through parasitism	0.02283
GO:0071395	cellular response to jasmonic acid stimulus	0.02283
GO:0009826	unidimensional cell growth	0.02299
GO:0044743	intracellular protein transmembrane import	0.02396
GO:0051240	positive regulation of multicellular organismal process	0.02396
GO:0044724	single-organism carbohydrate catabolic process	0.02397
GO:0050790	regulation of catalytic activity	0.02397
GO:0009581	detection of external stimulus	0.02404
GO:0009582	detection of abiotic stimulus	0.02404
GO:0048544	recognition of pollen	0.02404
GO:0052386	cell wall thickening	0.02404
GO:0052543	callose deposition in cell wall	0.02404
GO:0055072	iron ion homeostasis	0.02404
GO:0048507	meristem development	0.02435
GO:0051172	negative regulation of nitrogen compound metabolic process	0.02435
GO:0071806	protein transmembrane transport	0.0245
GO:0060560	developmental growth involved in morphogenesis	0.02475
GO:0044238	primary metabolic process	0.02545
GO:0048236	plant-type spore development	0.02558
GO:0051187	cofactor catabolic process	0.02558
GO:0051701	interaction with host	0.02558
GO:0001763	morphogenesis of a branching structure	0.02562
GO:0009616	virus induced gene silencing	0.02562
GO:0009902	chloroplast relocation	0.02562
GO:0010019	chloroplast-nucleus signaling pathway	0.02562
GO:0010104	regulation of ethylene-activated signaling pathway	0.02562
GO:0010196	nonphotochemical quenching	0.02562
GO:0010205	photoinhibition	0.02562
GO:0019750	chloroplast localization	0.02562
GO:0042793	transcription from plastid promoter	0.02562
GO:0043155	negative regulation of photosynthesis, light reaction	0.02562
GO:0048564	photosystem I assembly	0.02562
GO:0051644	plastid localization	0.02562
GO:0051667	establishment of plastid localization	0.02562
GO:0052018	modulation by symbiont of RNA levels in host	0.02562
GO:0052249	modulation of RNA levels in other organism involved in symbiotic interaction	0.02562
GO:0070297	regulation of phosphorelay signal transduction system	0.02562
GO:1901259	chloroplast rRNA processing	0.02562
GO:1990066	energy quenching	0.02562
GO:0071495	cellular response to endogenous stimulus	0.02599
GO:0048468	cell development	0.02759
GO:0006397	mRNA processing	0.02779
GO:0044267	cellular protein metabolic process	0.02801
GO:0044093	positive regulation of molecular function	0.02839
GO:0034645	cellular macromolecule biosynthetic process	0.02874
GO:0009064	glutamine family amino acid metabolic process	0.03046
GO:0035194	posttranscriptional gene silencing by RNA	0.03046
GO:0044802	single-organism membrane organization	0.0306
GO:0065002	intracellular protein transmembrane transport	0.03067
GO:0048589	developmental growth	0.03071
GO:0051094	positive regulation of developmental process	0.03077
GO:0031047	gene silencing by RNA	0.03347
GO:0005987	sucrose catabolic process	0.03438
GO:0006105	succinate metabolic process	0.03438
GO:0006428	isoleucyl-tRNA aminoacylation	0.03438
GO:0006429	leucyl-tRNA aminoacylation	0.03438
GO:0006431	methionyl-tRNA aminoacylation	0.03438
GO:0006438	valyl-tRNA aminoacylation	0.03438
GO:0006537	glutamate biosynthetic process	0.03438
GO:0006538	glutamate catabolic process	0.03438
GO:0006540	glutamate decarboxylation to succinate	0.03438
GO:0006597	spermine biosynthetic process	0.03438
GO:0006874	cellular calcium ion homeostasis	0.03438
GO:0007569	cell aging	0.03438
GO:0008215	spermine metabolic process	0.03438
GO:0008300	isoprenoid catabolic process	0.03438
GO:0009448	gamma-aminobutyric acid metabolic process	0.03438
GO:0009450	gamma-aminobutyric acid catabolic process	0.03438
GO:0009904	chloroplast accumulation movement	0.03438
GO:0010028	xanthophyll cycle	0.03438
GO:0010143	cutin biosynthetic process	0.03438
GO:0010269	response to selenium ion	0.03438
GO:0010343	singlet oxygen-mediated programmed cell death	0.03438
GO:0010345	suberin biosynthetic process	0.03438
GO:0010599	production of lsiRNA involved in RNA interference	0.03438
GO:0010617	circadian regulation of calcium ion oscillation	0.03438
GO:0010677	negative regulation of cellular carbohydrate metabolic process	0.03438
GO:0015729	oxaloacetate transport	0.03438
GO:0016110	tetraterpenoid catabolic process	0.03438
GO:0016115	terpenoid catabolic process	0.03438
GO:0016118	carotenoid catabolic process	0.03438
GO:0016121	carotene catabolic process	0.03438
GO:0016124	xanthophyll catabolic process	0.03438
GO:0017148	negative regulation of translation	0.03438
GO:0019464	glycine decarboxylation via glycine cleavage system	0.03438
GO:0030388	fructose 1,6-bisphosphate metabolic process	0.03438
GO:0032069	regulation of nuclease activity	0.03438
GO:0033962	cytoplasmic mRNA processing body assembly	0.03438
GO:0034249	negative regulation of cellular amide metabolic process	0.03438
GO:0034337	RNA folding	0.03438
GO:0034764	positive regulation of transmembrane transport	0.03438
GO:0036473	cell death in response to oxidative stress	0.03438
GO:0045834	positive regulation of lipid metabolic process	0.03438
GO:0046247	terpene catabolic process	0.03438
GO:0046889	positive regulation of lipid biosynthetic process	0.03438
GO:0048578	positive regulation of long-day photoperiodism, flowering	0.03438
GO:0048587	regulation of short-day photoperiodism, flowering	0.03438
GO:0051480	cytosolic calcium ion homeostasis	0.03438
GO:0051592	response to calcium ion	0.03438
GO:0071423	malate transmembrane transport	0.03438
GO:0080183	response to photooxidative stress	0.03438
GO:0090342	regulation of cell aging	0.03438
GO:0097468	programmed cell death in response to reactive oxygen species	0.03438
GO:2000468	regulation of peroxidase activity	0.03438
GO:0044262	cellular carbohydrate metabolic process	0.03467
GO:0051641	cellular localization	0.03474
GO:0016441	posttranscriptional gene silencing	0.03485
GO:0033365	protein localization to organelle	0.03512
GO:0048878	chemical homeostasis	0.03512
GO:0022604	regulation of cell morphogenesis	0.03533
GO:0043085	positive regulation of catalytic activity	0.03533
GO:0045165	cell fate commitment	0.03533
GO:0031327	negative regulation of cellular biosynthetic process	0.03566
GO:0000904	cell morphogenesis involved in differentiation	0.03576
GO:0010016	shoot system morphogenesis	0.03581
GO:0034622	cellular macromolecular complex assembly	0.03608
GO:0008037	cell recognition	0.03747
GO:0010305	leaf vascular tissue pattern formation	0.03747
GO:0048574	long-day photoperiodism, flowering	0.03747
GO:0000271	polysaccharide biosynthetic process	0.03768
GO:0009886	post-embryonic morphogenesis	0.03768
GO:0010558	negative regulation of macromolecule biosynthetic process	0.03788
GO:0006913	nucleocytoplasmic transport	0.03851
GO:0042545	cell wall modification	0.03851
GO:0051169	nuclear transport	0.03851
GO:0006401	RNA catabolic process	0.0386
GO:0097659	nucleic acid-templated transcription	0.0389
GO:0009991	response to extracellular stimulus	0.03937
GO:0044699	single-organism process	0.04009
GO:0016052	carbohydrate catabolic process	0.04164
GO:0051128	regulation of cellular component organization	0.04248
GO:0051253	negative regulation of RNA metabolic process	0.04273
GO:0032774	RNA biosynthetic process	0.04327
GO:0009900	dehiscence	0.04383
GO:0010496	intercellular transport	0.04383
GO:0019252	starch biosynthetic process	0.04383
GO:0045489	pectin biosynthetic process	0.04383
GO:0045927	positive regulation of growth	0.04383
GO:0071472	cellular response to salt stress	0.04383
GO:0009955	adaxial/abaxial pattern specification	0.04398
GO:0015996	chlorophyll catabolic process	0.04398
GO:0046149	pigment catabolic process	0.04398
GO:2000028	regulation of photoperiodism, flowering	0.04398
GO:0070271	protein complex biogenesis	0.04488
GO:0033036	macromolecule localization	0.04514
GO:0048584	positive regulation of response to stimulus	0.04535
GO:0008104	protein localization	0.04562
GO:0009156	ribonucleoside monophosphate biosynthetic process	0.04642
GO:0016482	cytoplasmic transport	0.04645
GO:0009250	glucan biosynthetic process	0.04659
GO:0048443	stamen development	0.04659
GO:0048466	androecium development	0.04659
GO:0071322	cellular response to carbohydrate stimulus	0.04725
GO:0000103	sulfate assimilation	0.04732
GO:0005986	sucrose biosynthetic process	0.04732
GO:0009690	cytokinin metabolic process	0.04732
GO:0010588	cotyledon vascular tissue pattern formation	0.04732
GO:0015840	urea transport	0.04732
GO:0016143	S-glycoside metabolic process	0.04732
GO:0019757	glycosinolate metabolic process	0.04732
GO:0019760	glucosinolate metabolic process	0.04732
GO:0031425	chloroplast RNA processing	0.04732
GO:0034250	positive regulation of cellular amide metabolic process	0.04732
GO:0034762	regulation of transmembrane transport	0.04732
GO:0044766	multi-organism transport	0.04732
GO:0045727	positive regulation of translation	0.04732
GO:0046794	transport of virus	0.04732
GO:0050665	hydrogen peroxide biosynthetic process	0.04732
GO:0071731	response to nitric oxide	0.04732
GO:1902579	multi-organism localization	0.04732
GO:0006351	transcription, DNA-templated	0.04804
GO:0034613	cellular protein localization	0.04814
GO:0009150	purine ribonucleotide metabolic process	0.04827
GO:0009627	systemic acquired resistance	0.04853
GO:0009630	gravitropism	0.04853
Table S2. Gene ontology analysis of up-regulated genes at 24 HPT. The table shows the GO categories into the Biological Process (BP), on the left is the GO:ID, description and on right P value (P < 0.05).
