# Supplementary material for: Transcriptional and Morpho-Physiological Responses of Marchantia polymorpha upon Phosphate Starvation
Source: Int J Mol Sci. 2020 Nov 7;21(21):8354. doi: 10.3390/ijms21218354 (PMC7672586; doi:10.3390/ijms21218354)
Supplement: Supplementary file 1 [file ijms-21-08354-s001.zip › Supplementary Table S3.xlsx]

## Sheet: Table S3
GO.ID	Term	p-value
GO:0044281	small molecule metabolic process	1.5e-10
GO:0010038	response to metal ion	4.8e-10
GO:1901564	organonitrogen compound metabolic process	9.3e-10
GO:0010035	response to inorganic substance	4.3e-09
GO:0046686	response to cadmium ion	9e-09
GO:0006082	organic acid metabolic process	1.8e-08
GO:0043436	oxoacid metabolic process	2.5e-08
GO:0019752	carboxylic acid metabolic process	3.1e-08
GO:0009072	aromatic amino acid family metabolic process	2.5e-07
GO:0006970	response to osmotic stress	1e-06
GO:0009651	response to salt stress	2e-06
GO:0009607	response to biotic stimulus	2.6e-06
GO:0042221	response to chemical	3e-06
GO:0006952	defense response	4.7e-06
GO:0006520	cellular amino acid metabolic process	3.3e-05
GO:0043207	response to external biotic stimulus	8e-05
GO:0051707	response to other organism	8e-05
GO:0015893	drug transport	0.00012
GO:0042493	response to drug	0.00012
GO:1901605	alpha-amino acid metabolic process	0.00012
GO:0006732	coenzyme metabolic process	0.00014
GO:1901135	carbohydrate derivative metabolic process	0.0002
GO:0042822	pyridoxal phosphate metabolic process	0.00022
GO:0042823	pyridoxal phosphate biosynthetic process	0.00022
GO:0006576	cellular biogenic amine metabolic process	0.00025
GO:0009117	nucleotide metabolic process	0.00026
GO:0019748	secondary metabolic process	0.00026
GO:0015711	organic anion transport	0.00026
GO:0019637	organophosphate metabolic process	0.00027
GO:0042742	defense response to bacterium	0.00027
GO:1901566	organonitrogen compound biosynthetic process	0.00029
GO:0006839	mitochondrial transport	0.00033
GO:0072524	pyridine-containing compound metabolic process	0.00035
GO:0055086	nucleobase-containing small molecule metabolic process	0.00039
GO:0098542	defense response to other organism	0.00041
GO:0006790	sulfur compound metabolic process	0.00042
GO:0006855	drug transmembrane transport	0.00043
GO:0045333	cellular respiration	0.00044
GO:0015980	energy derivation by oxidation of organic compounds	0.00045
GO:0006753	nucleoside phosphate metabolic process	0.00046
GO:0072525	pyridine-containing compound biosynthetic process	0.00047
GO:0009073	aromatic amino acid family biosynthetic process	0.00048
GO:0009617	response to bacterium	0.00049
GO:0043648	dicarboxylic acid metabolic process	0.00051
GO:0055085	transmembrane transport	0.00054
GO:0044283	small molecule biosynthetic process	0.00056
GO:0009108	coenzyme biosynthetic process	0.00065
GO:0009309	amine biosynthetic process	0.00072
GO:0042401	cellular biogenic amine biosynthetic process	0.00072
GO:0042542	response to hydrogen peroxide	0.00074
GO:0010243	response to organonitrogen compound	0.0008
GO:0072350	tricarboxylic acid metabolic process	0.00083
GO:0009605	response to external stimulus	0.00085
GO:0050896	response to stimulus	0.00086
GO:0009698	phenylpropanoid metabolic process	0.00087
GO:0006950	response to stress	0.001
GO:0000302	response to reactive oxygen species	0.00101
GO:0006163	purine nucleotide metabolic process	0.00103
GO:0006596	polyamine biosynthetic process	0.0011
GO:0046184	aldehyde biosynthetic process	0.0011
GO:0051704	multi-organism process	0.00116
GO:0044106	cellular amine metabolic process	0.00125
GO:0006558	L-phenylalanine metabolic process	0.00139
GO:1902221	erythrose 4-phosphate/phosphoenolpyruvate family amino acid metabolic process	0.00139
GO:0006559	L-phenylalanine catabolic process	0.00141
GO:1902222	erythrose 4-phosphate/phosphoenolpyruvate family amino acid catabolic process	0.00141
GO:0010043	response to zinc ion	0.00144
GO:0009100	glycoprotein metabolic process	0.00168
GO:0009101	glycoprotein biosynthetic process	0.00168
GO:0015849	organic acid transport	0.00185
GO:0046942	carboxylic acid transport	0.00185
GO:0010044	response to aluminum ion	0.00201
GO:0016054	organic acid catabolic process	0.00226
GO:0046395	carboxylic acid catabolic process	0.00226
GO:0006101	citrate metabolic process	0.00242
GO:0006487	protein N-linked glycosylation	0.00253
GO:0009628	response to abiotic stimulus	0.00265
GO:0009611	response to wounding	0.00279
GO:0008652	cellular amino acid biosynthetic process	0.00319
GO:0044282	small molecule catabolic process	0.00319
GO:0007005	mitochondrion organization	0.00356
GO:0072521	purine-containing compound metabolic process	0.00356
GO:0044711	single-organism biosynthetic process	0.00358
GO:0009161	ribonucleoside monophosphate metabolic process	0.0037
GO:0044712	single-organism catabolic process	0.00379
GO:0042430	indole-containing compound metabolic process	0.00385
GO:1901657	glycosyl compound metabolic process	0.00395
GO:0019693	ribose phosphate metabolic process	0.00416
GO:0002376	immune system process	0.00416
GO:0009074	aromatic amino acid family catabolic process	0.00424
GO:0097164	ammonium ion metabolic process	0.00424
GO:0051186	cofactor metabolic process	0.0044
GO:0009126	purine nucleoside monophosphate metabolic process	0.00453
GO:0009167	purine ribonucleoside monophosphate metabolic process	0.00453
GO:0009714	chalcone metabolic process	0.00499
GO:0009715	chalcone biosynthetic process	0.00499
GO:0009060	aerobic respiration	0.00502
GO:0009150	purine ribonucleotide metabolic process	0.00506
GO:0009123	nucleoside monophosphate metabolic process	0.00516
GO:0006486	protein glycosylation	0.00592
GO:0043413	macromolecule glycosylation	0.00592
GO:0006564	L-serine biosynthetic process	0.00634
GO:0009443	pyridoxal 5'-phosphate salvage	0.00634
GO:0008219	cell death	0.00656
GO:0016265	death	0.00656
GO:0006099	tricarboxylic acid cycle	0.00672
GO:1901565	organonitrogen compound catabolic process	0.00676
GO:0006595	polyamine metabolic process	0.00736
GO:0009435	NAD biosynthetic process	0.00736
GO:0044763	single-organism cellular process	0.00777
GO:0006568	tryptophan metabolic process	0.00786
GO:0006586	indolalkylamine metabolic process	0.00786
GO:0009063	cellular amino acid catabolic process	0.00795
GO:0046496	nicotinamide nucleotide metabolic process	0.00804
GO:0009266	response to temperature stimulus	0.00817
GO:0009259	ribonucleotide metabolic process	0.00892
GO:0019362	pyridine nucleotide metabolic process	0.00977
GO:0009058	biosynthetic process	0.00983
GO:0009144	purine nucleoside triphosphate metabolic process	0.01105
GO:0009199	ribonucleoside triphosphate metabolic process	0.01105
GO:0009205	purine ribonucleoside triphosphate metabolic process	0.01105
GO:0006733	oxidoreduction coenzyme metabolic process	0.01108
GO:0015748	organophosphate ester transport	0.01109
GO:0044550	secondary metabolite biosynthetic process	0.01109
GO:0016053	organic acid biosynthetic process	0.01155
GO:0044723	single-organism carbohydrate metabolic process	0.01155
GO:0046394	carboxylic acid biosynthetic process	0.01155
GO:0009116	nucleoside metabolic process	0.01172
GO:0009308	amine metabolic process	0.01249
GO:0012501	programmed cell death	0.01256
GO:0006119	oxidative phosphorylation	0.01278
GO:0006626	protein targeting to mitochondrion	0.01278
GO:0042773	ATP synthesis coupled electron transport	0.01278
GO:0070585	protein localization to mitochondrion	0.01278
GO:0072655	establishment of protein localization to mitochondrion	0.01278
GO:0010200	response to chitin	0.01329
GO:0015718	monocarboxylic acid transport	0.01329
GO:0042181	ketone biosynthetic process	0.01366
GO:1901700	response to oxygen-containing compound	0.01409
GO:0009808	lignin metabolic process	0.01476
GO:1990267	response to transition metal nanoparticle	0.01524
GO:1901615	organic hydroxy compound metabolic process	0.01539
GO:0046939	nucleotide phosphorylation	0.01555
GO:0070085	glycosylation	0.01563
GO:0006091	generation of precursor metabolites and energy	0.01602
GO:0046034	ATP metabolic process	0.01649
GO:0046128	purine ribonucleoside metabolic process	0.01681
GO:0009699	phenylpropanoid biosynthetic process	0.01683
GO:1901264	carbohydrate derivative transport	0.01683
GO:0009141	nucleoside triphosphate metabolic process	0.01718
GO:0006006	glucose metabolic process	0.0177
GO:0032787	monocarboxylic acid metabolic process	0.01799
GO:0044765	single-organism transport	0.01864
GO:0006090	pyruvate metabolic process	0.01933
GO:0009814	defense response, incompatible interaction	0.02075
GO:0016052	carbohydrate catabolic process	0.02075
GO:0001666	response to hypoxia	0.02088
GO:1902578	single-organism localization	0.02114
GO:0042278	purine nucleoside metabolic process	0.02146
GO:0006122	mitochondrial electron transport, ubiquinol to cytochrome c	0.02184
GO:0008216	spermidine metabolic process	0.02184
GO:0008295	spermidine biosynthetic process	0.02184
GO:0033273	response to vitamin	0.02184
GO:0042775	mitochondrial ATP synthesis coupled electron transport	0.02184
GO:0042816	vitamin B6 metabolic process	0.02184
GO:0042819	vitamin B6 biosynthetic process	0.02184
GO:0045730	respiratory burst	0.02184
GO:0046417	chorismate metabolic process	0.02184
GO:0006955	immune response	0.02282
GO:0044724	single-organism carbohydrate catabolic process	0.02366
GO:0022904	respiratory electron transport chain	0.02389
GO:0009626	plant-type hypersensitive response	0.02538
GO:0034050	host programmed cell death induced by symbiont	0.02538
GO:0009119	ribonucleoside metabolic process	0.02539
GO:0009409	response to cold	0.02542
GO:0006084	acetyl-CoA metabolic process	0.02548
GO:0006188	IMP biosynthetic process	0.02548
GO:0046040	IMP metabolic process	0.02548
GO:0044272	sulfur compound biosynthetic process	0.02669
GO:0006811	ion transport	0.02792
GO:1902600	hydrogen ion transmembrane transport	0.02867
GO:1901606	alpha-amino acid catabolic process	0.02949
GO:0051188	cofactor biosynthetic process	0.02963
GO:0006165	nucleoside diphosphate phosphorylation	0.03012
GO:1901617	organic hydroxy compound biosynthetic process	0.03017
GO:0010941	regulation of cell death	0.03036
GO:0006818	hydrogen transport	0.03162
GO:0015992	proton transport	0.03162
GO:0009620	response to fungus	0.03274
GO:0000122	negative regulation of transcription from RNA polymerase II promoter	0.03428
GO:0002679	respiratory burst involved in defense response	0.03428
GO:0006083	acetate metabolic process	0.03428
GO:0006842	tricarboxylic acid transport	0.03428
GO:0009423	chorismate biosynthetic process	0.03428
GO:0009445	putrescine metabolic process	0.03428
GO:0009446	putrescine biosynthetic process	0.03428
GO:0015714	phosphoenolpyruvate transport	0.03428
GO:0019354	siroheme biosynthetic process	0.03428
GO:0019427	acetyl-CoA biosynthetic process from acetate	0.03428
GO:0046156	siroheme metabolic process	0.03428
GO:0051176	positive regulation of sulfur metabolic process	0.03428
GO:0052033	pathogen-associated molecular pattern dependent induction by symbiont of host innate immune response	0.03428
GO:0052166	positive regulation by symbiont of host innate immune response	0.03428
GO:0052167	modulation by symbiont of host innate immune response	0.03428
GO:0052169	pathogen-associated molecular pattern dependent modulation by symbiont of host innate immune response	0.03428
GO:0052257	pathogen-associated molecular pattern dependent induction by organism of innate immune response of other organism involved in symbiotic interaction	0.03428
GO:0052305	positive regulation by organism of innate immune response in other organism involved in symbiotic interaction	0.03428
GO:0052306	modulation by organism of innate immune response in other organism involved in symbiotic interaction	0.03428
GO:0052308	pathogen-associated molecular pattern dependent modulation by organism of innate immune response in other organism involved in symbiotic interaction	0.03428
GO:0052509	positive regulation by symbiont of host defense response	0.03428
GO:0052510	positive regulation by organism of defense response of other organism involved in symbiotic interaction	0.03428
GO:1901576	organic substance biosynthetic process	0.0349
GO:0002252	immune effector process	0.03505
GO:0006563	L-serine metabolic process	0.03505
GO:0006108	malate metabolic process	0.03724
GO:0006835	dicarboxylic acid transport	0.03724
GO:0019359	nicotinamide nucleotide biosynthetic process	0.03724
GO:0015988	energy coupled proton transmembrane transport, against electrochemical gradient	0.03724
GO:0015991	ATP hydrolysis coupled proton transport	0.03724
GO:0043067	regulation of programmed cell death	0.03816
GO:0045087	innate immune response	0.041
GO:0009408	response to heat	0.0423
GO:0009165	nucleotide biosynthetic process	0.04274
GO:0030258	lipid modification	0.04281
GO:0010193	response to ozone	0.0436
GO:0010942	positive regulation of cell death	0.0436
GO:0090407	organophosphate biosynthetic process	0.04386
GO:0006820	anion transport	0.04399
GO:0009132	nucleoside diphosphate metabolic process	0.04456
GO:1901607	alpha-amino acid biosynthetic process	0.0446
GO:0000103	sulfate assimilation	0.04712
GO:0000266	mitochondrial fission	0.04712
GO:0006020	inositol metabolic process	0.04712
GO:0006085	acetyl-CoA biosynthetic process	0.04712
GO:0006094	gluconeogenesis	0.04712
GO:0006189	'de novo' IMP biosynthetic process	0.04712
GO:0010315	auxin efflux	0.04712
GO:0016143	S-glycoside metabolic process	0.04712
GO:0019757	glycosinolate metabolic process	0.04712
GO:0019760	glucosinolate metabolic process	0.04712
GO:0046688	response to copper ion	0.04712
GO:0006096	glycolytic process	0.04738
GO:0006757	ATP generation from ADP	0.04738
GO:0009135	purine nucleoside diphosphate metabolic process	0.04738
GO:0009179	purine ribonucleoside diphosphate metabolic process	0.04738
GO:0009185	ribonucleoside diphosphate metabolic process	0.04738
GO:0046031	ADP metabolic process	0.04738
GO:1901293	nucleoside phosphate biosynthetic process	0.04744
GO:0034440	lipid oxidation	0.04813
GO:0009751	response to salicylic acid	0.04833
Table S3. Gene ontology analysis of up-regulated genes at 150 HPT. The table shows the GO categories into the Biological Process (BP), on the left is the GO:ID, description and on right P value (P < 0.05).
