# Supplementary material for: Transcriptional and Morpho-Physiological Responses of Marchantia polymorpha upon Phosphate Starvation
Source: Int J Mol Sci. 2020 Nov 7;21(21):8354. doi: 10.3390/ijms21218354 (PMC7672586; doi:10.3390/ijms21218354)
Supplement: Supplementary file 1 [file ijms-21-08354-s001.zip › Supplementary Table S4.xlsx]

## Sheet: Table S4
Table S4. Enrichment analysis of P1BS motives. Here, we show the MpID(V3.1), number of P1BS motives enriched and the fold change.
mID	Motives	12 HPT	24 HPT	150 HPT
Mapoly0001s0001	2	2.14	5.48	1.07
Mapoly0001s0048	1	-2.78	-2.7	-1.57
Mapoly0001s0053	2	-1.31	-1.72	1.24
Mapoly0001s0054	1	-1.25	-1.58	1.14
Mapoly0001s0070	2	-1.22	1.7	1.89
Mapoly0001s0077	1	-1.09	-1.47	2.65
Mapoly0001s0084	1	1.48	1.54	-1.24
Mapoly0001s0089	2	1.21	1.39	-1.6
Mapoly0001s0098	1	2.08	1.36	1.04
Mapoly0001s0101	1	-1.52	1.4	1.01
Mapoly0001s0108	1	-2.01	-3.73	1.24
Mapoly0001s0109	1	-2.56	-4.84	1.03
Mapoly0001s0131	2	1.85	-1.23	1.94
Mapoly0001s0147	2	-1.13	-1.02	1.8
Mapoly0001s0153	2	-1.05	-1.29	2.03
Mapoly0001s0160	1	1.45	-2.95	-1.68
Mapoly0001s0164	1	2.67	1.27	1.13
Mapoly0001s0170	2	1.69	1.08	1.43
Mapoly0001s0182	2	1.02	1.04	1.73
Mapoly0001s0184	2	1.1	-2.11	2.66
Mapoly0001s0195	2	-1.53	1.07	1.34
Mapoly0001s0197	1	-1.57	1.02	1.01
Mapoly0001s0204	1	-1.57	-1.53	6.91
Mapoly0001s0211	1	20.18	3.09	55.66
Mapoly0001s0223	1	1.14	-1.42	-1.89
Mapoly0001s0227	2	1.49	-1.11	1.72
Mapoly0001s0242	2	1.7	1.02	3.59
Mapoly0001s0246	2	1	1.09	1.59
Mapoly0001s0264	2	-1.72	-1.25	-2.17
Mapoly0001s0268	2	-1.65	-1.35	-2.12
Mapoly0001s0269	2	-2.96	-5.05	3.74
Mapoly0001s0276	1	1.41	3.73	3.28
Mapoly0001s0277	2	-1.47	1.69	-2.52
Mapoly0001s0279	2	1.46	1.9	-1.24
Mapoly0001s0305	2	-1.52	-1.44	1
Mapoly0001s0315	1	-1.56	-1.33	-2.56
Mapoly0001s0330	2	1.22	2.18	-1.56
Mapoly0001s0335	1	-1.01	1.44	-1.63
Mapoly0001s0360	2	1.11	1.33	-2.82
Mapoly0001s0362	1	-2.16	1.43	-2.34
Mapoly0001s0379	1	2.45	-2.28	57.18
Mapoly0001s0380	2	-1.54	1.6	1.02
Mapoly0001s0381	2	-1.49	1.09	1.8
Mapoly0001s0382	2	-1.43	-1.18	1.88
Mapoly0001s0398	1	1.3	1.55	1.09
Mapoly0001s0400	2	-1.19	1.29	-2.07
Mapoly0001s0408	2	1.13	-1.02	-2.77
Mapoly0001s0416	1	-1.86	1.23	-1.34
Mapoly0001s0418	2	-1.7	1.43	-2.63
Mapoly0001s0419	2	-2.41	-1.61	-2.57
Mapoly0001s0424	2	-1.15	1.05	-5.63
Mapoly0001s0442	2	1.08	1.09	-1.6
Mapoly0001s0446	1	-2.88	1.49	-1.52
Mapoly0001s0449	2	6.48	1.1	1.24
Mapoly0001s0451	2	-1.13	-1.17	-2.73
Mapoly0001s0455	2	-1.87	-2.17	-1.82
Mapoly0001s0460	2	-1.27	1.02	2.55
Mapoly0001s0474	2	-1.27	-2.05	-2.8
Mapoly0001s0475	2	1.17	-1.6	-2.99
Mapoly0001s0479	2	1.44	-1.23	2.19
Mapoly0001s0484	1	1.02	1.08	1.52
Mapoly0001s0492	2	1.22	-1.27	1.65
Mapoly0001s0493	2	-1.54	1.86	-2.01
Mapoly0001s0496	2	-2.24	-2.24	-2.64
Mapoly0001s0513	2	-1.76	-1.38	1.96
Mapoly0001s0539	2	1.03	-1.52	1.57
Mapoly0001s0543	1	1.04	1.03	2.41
Mapoly0001s0544	1	1.07	-1	2.41
Mapoly0001s0550	2	-1.21	-1.96	-2.14
Mapoly0001s0561	2	-3.38	-13.28	-3.35
Mapoly0001s0562	2	-1.19	-1.75	-1.13
Mapoly0001s0563	2	2.25	1.01	-1.21
Mapoly0001s0565	1	1.51	2.01	-3.58
Mapoly0001s0569	2	2.32	-1.2	12.47
Mapoly0002s0002	2	2.03	-1.22	1.38
Mapoly0002s0006	2	1.25	-1.09	2.33
Mapoly0002s0020	2	-1.65	1.38	1.09
Mapoly0002s0041	1	1.13	-1.08	1.85
Mapoly0002s0049	2	-1.2	-1.06	2.86
Mapoly0002s0070	2	-4.54	2.02	-1.22
Mapoly0002s0074	1	-1.28	-2.5	3.15
Mapoly0002s0080	1	1.54	-1.8	4.14
Mapoly0002s0085	1	1.29	-1.17	-2.33
Mapoly0002s0094	1	1.15	-1.05	1.51
Mapoly0002s0111	2	1.74	-1.16	-3.68
Mapoly0002s0113	2	-2.38	-3.45	-1.13
Mapoly0002s0117	1	1.35	-1.2	1.66
Mapoly0002s0119	1	1.54	1.24	-1.8
Mapoly0002s0121	2	1.65	2.35	1.21
Mapoly0002s0122	1	1.55	1.13	1.44
Mapoly0002s0123	2	1.14	1.17	0
Mapoly0002s0130	1	-1.16	1.41	-2.36
Mapoly0002s0134	2	-2.33	-2.13	-1.52
Mapoly0002s0135	1	1.12	-1.1	-1.89
Mapoly0002s0147	2	1.46	-1.75	1.63
Mapoly0002s0161	2	1.24	1.47	2.77
Mapoly0002s0164	2	-1.15	-1.84	1.25
Mapoly0002s0166	2	1.17	-1.83	-3.23
Mapoly0002s0179	1	1.59	1.74	1.66
Mapoly0002s0181	2	-1.25	-1.98	2.15
Mapoly0002s0200	2	1.09	-1.61	1.82
Mapoly0002s0206	1	1.53	-1.08	1.72
Mapoly0002s0209	1	-1.16	1.04	-1.73
Mapoly0002s0224	1	-1.91	-3.48	1.3
Mapoly0002s0233	1	1.11	-1.19	1.79
Mapoly0002s0234	1	-2.22	-1.1	1.36
Mapoly0002s0236	1	-2.26	260.06	2.38
Mapoly0002s0242	1	-1.06	1.24	-1.62
Mapoly0002s0257	2	1.35	-1.02	1.57
Mapoly0002s0266	1	1.18	-1.02	2
Mapoly0002s0268	1	-2.63	1.34	3.32
Mapoly0002s0284	1	-1.67	-1.5	1.39
Mapoly0002s0301	1	-1.37	-2.16	1.32
Mapoly0002s0318	2	-1.98	-2.32	-2.36
Mapoly0002s0331	2	-1.38	-1.69	1.09
Mapoly0002s0335	1	1.52	-1.22	2.47
Mapoly0002s0336	1	2.25	-1.01	10.7
Mapoly0002s0337	2	-1.7	1.1	1.84
Mapoly0003s0003	2	-1.49	-1.04	-3.04
Mapoly0003s0015	2	-1.44	1.41	-2.16
Mapoly0003s0020	1	1.05	-1.31	2.35
Mapoly0003s0021	1	1.48	-1.15	3.86
Mapoly0003s0061	2	-2.05	-2.86	2.56
Mapoly0003s0073	1	-1.09	-1.25	1.54
Mapoly0003s0095	1	-1.66	-3.19	-3.7
Mapoly0003s0096	2	1.57	1.53	-1.23
Mapoly0003s0123	2	1.03	1.48	-1.94
Mapoly0003s0126	2	-1.55	-3.99	-6.41
Mapoly0003s0130	2	-1.66	-1.1	-1.05
Mapoly0003s0136	1	-1.11	1.19	-3.07
Mapoly0003s0152	2	1.65	1.39	-1
Mapoly0003s0166	2	-2.35	-1.52	-1.36
Mapoly0003s0167	2	-2.05	-3.12	2.76
Mapoly0003s0183	2	1.15	-1.64	-1.82
Mapoly0003s0184	2	-1.22	1.69	-1.73
Mapoly0003s0206	2	1.04	1.56	-1.06
Mapoly0003s0219	1	1.53	1.92	1.41
Mapoly0003s0221	1	1.18	2.03	2.41
Mapoly0003s0253	1	-1.13	-1.9	3.73
Mapoly0003s0254	2	1.09	-1.08	2.32
Mapoly0003s0259	1	-1.25	-1.19	-7.11
Mapoly0003s0265	1	4.35	1.83	-14.76
Mapoly0003s0270	2	-3.7	-4.24	-10.49
Mapoly0003s0284	2	-1.22	-1.51	1.01
Mapoly0003s0291	1	2.37	2.77	1.96
Mapoly0003s0301	2	-1.17	1.31	-1.77
Mapoly0003s0305	1	1.28	1.5	3.13
Mapoly0003s0307	2	1.1	1.19	2.47
Mapoly0003s0312	2	1.11	-1.22	-5.18
Mapoly0004s0008	2	-1.7	-1.16	1.2
Mapoly0004s0012	2	1.26	1.32	-8.22
Mapoly0004s0015	2	-1.3	-1.02	-2.9
Mapoly0004s0024	1	1.34	1.27	1.52
Mapoly0004s0025	1	2	4.38	-1.36
Mapoly0004s0028	1	1.74	1.36	-12.3
Mapoly0004s0029	2	-1.15	-1.28	1.59
Mapoly0004s0045	2	-2.03	-1.44	-1.08
Mapoly0004s0052	1	1.21	1.08	1.61
Mapoly0004s0057	1	-1.12	-1.63	-1.02
Mapoly0004s0062	1	1.03	-1.85	2.89
Mapoly0004s0063	1	-2.42	-4.88	16.74
Mapoly0004s0091	2	4.55	2.28	1.49
Mapoly0004s0092	2	12.96	2.81	3.26
Mapoly0004s0093	2	7.57	3.71	1.92
Mapoly0004s0094	2	6.39	2.56	2.21
Mapoly0004s0099	1	1.02	-2.02	1.98
Mapoly0004s0100	1	-1.14	2.06	1.18
Mapoly0004s0107	2	-1.11	-1.66	2.56
Mapoly0004s0139	2	-4.56	1.04	4.42
Mapoly0004s0153	2	-1.4	-1.26	-1.7
Mapoly0004s0156	2	-1.2	-1.66	1.18
Mapoly0004s0157	2	-1.99	1.48	1.79
Mapoly0004s0164	2	-1.49	-2.26	2.95
Mapoly0004s0171	2	1.18	-1.13	1.54
Mapoly0004s0177	1	-1.1	-1.54	-1.12
Mapoly0004s0179	2	2.15	1.39	-2.25
Mapoly0004s0182	1	13.77	1.08	70.44
Mapoly0004s0191	2	1.52	1.61	-1.24
Mapoly0004s0192	1	-2.06	-1.37	-2.46
Mapoly0004s0204	2	0	-2.67	0
Mapoly0004s0207	2	1.11	1.04	1.52
Mapoly0004s0213	1	1.33	1.96	-4990.61
Mapoly0004s0214	1	-1.43	1.14	-1.53
Mapoly0004s0227	1	1.72	-1.15	1
Mapoly0004s0230	1	-1.97	-1.23	1.1
Mapoly0004s0233	1	-1.24	2.35	-7.25
Mapoly0004s0241	2	1.04	-1.53	1.37
Mapoly0004s0256	1	1.13	-1.06	1.65
Mapoly0004s0259	2	2.12	1.96	-5.79
Mapoly0004s0263	1	1.25	1.75	1.09
Mapoly0004s0270	1	1.4	-1.58	-5.83
Mapoly0004s0273	2	1.6	1.04	1.06
Mapoly0004s0296	2	-1.66	-1.83	-2.7
Mapoly0004s0300	1	-1.23	-1.06	-3.73
Mapoly0004s0309	2	3.39	1.42	-2.24
Mapoly0005s0004	1	0	-1.51	4.69
Mapoly0005s0016	2	-1.06	-1.27	-2.07
Mapoly0005s0020	1	-1.29	-1.59	1.07
Mapoly0005s0021	1	-1.31	-1.17	-3.11
Mapoly0005s0027	1	-2.27	-1.4	5.89
Mapoly0005s0034	2	1.59	1.47	-3.23
Mapoly0005s0045	2	-1.58	1.02	-1.26
Mapoly0005s0055	1	1.15	-1.28	1.67
Mapoly0005s0067	1	1.39	-1.47	-1.19
Mapoly0005s0069	1	-1.04	1.85	2.33
Mapoly0005s0075	2	-1.55	1.28	1.52
Mapoly0005s0078	2	1.01	1.23	1.56
Mapoly0005s0082	2	-1.24	-1.11	1.6
Mapoly0005s0086	1	2.15	-1.38	-1.79
Mapoly0005s0087	1	1.62	0	11.56
Mapoly0005s0090	2	1.67	1.73	-1.17
Mapoly0005s0097	2	-3.57	-22.48	-1.18
Mapoly0005s0099	1	-1.06	-2.04	2.02
Mapoly0005s0100	1	1.14	1.54	2.11
Mapoly0005s0105	2	-1.7	1.28	1.03
Mapoly0005s0123	1	-1.67	1.72	2.44
Mapoly0005s0130	2	-1.13	-1.31	-2.52
Mapoly0005s0133	1	1.5	1.9	-3.84
Mapoly0005s0138	2	-1.21	1.1	-4.19
Mapoly0005s0142	1	-1.28	-1.54	1.23
Mapoly0005s0144	1	1.32	1.55	1.92
Mapoly0005s0165	1	-2.3	1.04	-2.03
Mapoly0005s0169	1	1.24	-1.24	1.67
Mapoly0005s0171	2	-1.23	-1.5	1.79
Mapoly0005s0185	2	-1.33	-1.78	-1.04
Mapoly0005s0186	1	1.1	-1.2	1.23
Mapoly0005s0194	1	1.63	1.52	-1.82
Mapoly0005s0220	2	1.38	1.5	-3.53
Mapoly0005s0236	2	-1.12	-1.53	-1.3
Mapoly0005s0242	1	1.14	2.81	0
Mapoly0005s0245	1	1.34	1.32	-2.22
Mapoly0005s0246	2	-1.14	-1.36	1.73
Mapoly0005s0249	1	-1.13	1.31	2.27
Mapoly0005s0258	1	1.86	1.53	-2.26
Mapoly0005s0291	2	-1.37	-1.35	1.86
Mapoly0006s0001	2	28.08	5.27	16.59
Mapoly0006s0004	2	1.76	1.33	-1.33
Mapoly0006s0007	2	-1.34	-1.89	1.49
Mapoly0006s0049	2	-1.04	1.26	-2.4
Mapoly0006s0050	1	1.42	1.42	-1.99
Mapoly0006s0055	2	1.13	1.41	-1.64
Mapoly0006s0080	2	-1.44	-1	-1.71
Mapoly0006s0094	2	-1.42	-1.91	1.96
Mapoly0006s0105	1	1.12	-8.2	-5.41
Mapoly0006s0125	1	2.93	2.13	-1.68
Mapoly0006s0130	2	-1.49	-7.83	-4.16
Mapoly0006s0143	1	1.77	3.73	1.9
Mapoly0006s0145	1	1.22	1.59	-4.39
Mapoly0006s0148	2	0	0	-8.85
Mapoly0006s0149	2	1.18	1.83	-4.08
Mapoly0006s0156	2	-2.3	1.01	-1.13
Mapoly0006s0188	1	1.63	1.17	2.44
Mapoly0006s0189	2	-1.16	-1.69	-11.21
Mapoly0006s0200	2	2.55	1.62	-1.15
Mapoly0006s0206	1	-1.22	-1.07	1.69
Mapoly0006s0216	2	9.08	-12.84	-1.31
Mapoly0006s0223	2	-1.28	-1.33	1.65
Mapoly0006s0234	1	-1.61	-1.06	-1.02
Mapoly0006s0239	2	1.4	-1.07	1.71
Mapoly0006s0243	2	-1.24	-6.11	-4.38
Mapoly0006s0245	1	-1.1	-4.33	-1.68
Mapoly0006s0246	1	-1.1	-2.45	2.61
Mapoly0006s0250	1	-1.16	-1.41	-7.26
Mapoly0006s0257	1	-1.07	-1.62	2.03
Mapoly0006s0262	2	1.45	1.52	-2.32
Mapoly0006s0266	1	-1.4	-1.73	-1.45
Mapoly0006s0286	2	1.33	-2.39	-2.67
Mapoly0006s0297	1	-1.01	-1.17	1.93
Mapoly0006s0310	2	1.06	-1.08	-2.36
Mapoly0007s0001	2	1.14	1.1	1.92
Mapoly0007s0002	2	-3.38	1.32	-1.61
Mapoly0007s0023	1	3	6.48	2.45
Mapoly0007s0025	2	4.81	2.86	3.05
Mapoly0007s0032	2	-1.59	-1.34	1.05
Mapoly0007s0049	2	1.31	-1.25	1.57
Mapoly0007s0051	1	-1.73	-1.03	1.07
Mapoly0007s0055	2	1.28	1.57	-1.39
Mapoly0007s0065	2	1.04	-1.26	2.12
Mapoly0007s0068	1	1.41	1.98	-1.56
Mapoly0007s0076	2	-1.56	1.25	1.54
Mapoly0007s0078	1	1.11	-1.29	2.13
Mapoly0007s0086	2	-1.21	-1.25	-1.74
Mapoly0007s0087	1	1.37	1.73	-1.31
Mapoly0007s0091	1	1.42	-1.05	2.9
Mapoly0007s0093	1	-1.26	1.18	-1.66
Mapoly0007s0094	2	1.15	2.08	1.05
Mapoly0007s0099	1	2.4	-1.79	-1.67
Mapoly0007s0110	2	-1.42	1.17	-1.65
Mapoly0007s0118	1	-1.07	-1.3	1.57
Mapoly0007s0126	1	2.1	1.92	1.05
Mapoly0007s0137	2	-1.11	2.11	1.63
Mapoly0007s0179	2	1.17	-2.54	6.17
Mapoly0007s0184	2	-5.65	-2.09	-6.78
Mapoly0007s0186	2	-1.26	-3.4	-13.7
Mapoly0007s0187	2	1.15	-1.19	-3.21
Mapoly0007s0205	2	6.14	-1.05	2.47
Mapoly0007s0216	2	1.15	1.68	-2.68
Mapoly0007s0229	2	-1.33	-1.09	3.17
Mapoly0007s0230	2	1.18	-2.91	3.38
Mapoly0007s0237	1	1.14	-1.1	1.7
Mapoly0007s0239	2	-1.02	-1.27	-3.59
Mapoly0007s0244	2	-1.31	1.24	-2.23
Mapoly0007s0251	2	1.26	1.59	-1.1
Mapoly0007s0254	2	-1.76	-1.81	-1.08
Mapoly0007s0262	1	1.58	1.64	-1.89
Mapoly0007s0271	2	1.07	1.3	-1.54
Mapoly0008s0029	2	-1.05	-1.92	-1.01
Mapoly0008s0037	2	1.36	1.63	-2.96
Mapoly0008s0038	2	1.15	-1.06	1.67
Mapoly0008s0039	2	-1.64	-1.03	1.09
Mapoly0008s0051	2	-1.58	-1.43	-1.86
Mapoly0008s0057	2	-2.69	-5.88	-9.59
Mapoly0008s0066	2	1.53	1.67	1.61
Mapoly0008s0067	2	-1.52	-1.24	1.31
Mapoly0008s0073	2	-1.27	-1.52	-3.99
Mapoly0008s0076	2	1.14	1.05	2.04
Mapoly0008s0082	1	1.05	-1.14	1.57
Mapoly0008s0087	2	-1.78	-1.24	-1.65
Mapoly0008s0088	2	1.99	1.04	-1.25
Mapoly0008s0092	2	2.63	-1.31	2.41
Mapoly0008s0094	2	-2.25	-1.93	0
Mapoly0008s0099	1	-2.05	1.3	-4.12
Mapoly0008s0108	2	-2.11	1.2	-1.06
Mapoly0008s0145	1	1.47	1.49	-2.39
Mapoly0008s0155	2	1.21	-1.04	1.56
Mapoly0008s0161	2	-143.7	1.54	-6.22
Mapoly0008s0165	2	2.12	1.26	-1.52
Mapoly0008s0168	1	45.78	0	0
Mapoly0008s0172	2	1.42	-4.27	-3.23
Mapoly0008s0173	2	2.72	-2.08	-4.91
Mapoly0008s0179	1	-2.35	1.05	1.18
Mapoly0008s0182	2	-1.65	1.02	1.08
Mapoly0008s0187	2	-1	-1.09	2.35
Mapoly0008s0188	2	1.23	-1.67	2.05
Mapoly0008s0194	1	1.29	1.7	-2.73
Mapoly0008s0203	1	2.79	1.95	2.29
Mapoly0008s0207	2	4.83	1.41	7.9
Mapoly0008s0216	2	1.89	2.15	-2.91
Mapoly0008s0246	2	1.23	1.2	-9.47
Mapoly0008s0254	1	1.18	1.07	-1.77
Mapoly0009s0004	1	1.2	-1.14	3.12
Mapoly0009s0011	1	-1.44	1.74	1.21
Mapoly0009s0012	2	-1.6	-1.2	1.01
Mapoly0009s0017	2	-1.29	-1.11	1.52
Mapoly0009s0024	2	1.27	-2.27	6.58
Mapoly0009s0025	2	1.53	-3.72	3.61
Mapoly0009s0031	1	-1.45	-1.6	1.28
Mapoly0009s0044	2	1.17	1.64	1.69
Mapoly0009s0048	1	-1.62	2.85	-3.84
Mapoly0009s0056	2	-1.01	1.21	-4.21
Mapoly0009s0083	2	-1.07	1.06	2.48
Mapoly0009s0096	1	-2.08	-1.15	-1.15
Mapoly0009s0097	2	-2.04	-1.14	-1.34
Mapoly0009s0113	2	-1.66	-1.16	-1.16
Mapoly0009s0115	2	1.19	-1.37	-1.8
Mapoly0009s0124	1	-2.22	-2.09	1.42
Mapoly0009s0150	2	-1.67	1.16	1.58
Mapoly0009s0151	2	1.53	-1.03	4.66
Mapoly0009s0158	2	-1.07	1.64	1.18
Mapoly0009s0172	2	1.75	2.27	1.6
Mapoly0009s0173	1	12.57	1.49	15.9
Mapoly0009s0174	1	2.53	1.25	3.25
Mapoly0009s0177	2	1.98	-1.45	12.53
Mapoly0009s0178	2	2.5	-1.66	14.37
Mapoly0009s0180	2	1.52	-1.29	5.71
Mapoly0009s0187	1	-1.14	1.21	-2.26
Mapoly0009s0197	2	-1.28	1.24	-1.78
Mapoly0009s0202	2	-3.77	-2.08	-16.51
Mapoly0009s0207	2	-2.19	-1.13	-1.42
Mapoly0009s0208	1	-1.64	-1.55	-2.24
Mapoly0009s0209	2	-1.45	1.03	1.56
Mapoly0009s0223	2	1.03	1.53	-1.41
Mapoly0009s0225	2	-1.03	-1.64	-1.39
Mapoly0009s0230	1	-1.19	-2.54	-1.37
Mapoly0009s0242	2	1.05	2.82	0
Mapoly0010s0009	1	-1.09	-1.04	1.6
Mapoly0010s0013	1	-2.19	1.31	-1.85
Mapoly0010s0017	1	1.29	1.38	1.66
Mapoly0010s0019	2	1.78	-1.32	3.1
Mapoly0010s0022	2	1.82	2.96	-4.17
Mapoly0010s0023	1	3.71	1.33	-8.36
Mapoly0010s0027	2	1.15	-1.43	2.07
Mapoly0010s0033	2	1.45	1.41	3.38
Mapoly0010s0049	2	1.62	1.35	-2.43
Mapoly0010s0062	1	-1.14	1.35	-1.84
Mapoly0010s0083	2	2.89	1.1	-1.14
Mapoly0010s0090	2	-1.94	-1.86	-1.47
Mapoly0010s0094	1	-28.12	2.25	-1.68
Mapoly0010s0100	1	1.83	2.08	1.39
Mapoly0010s0102	2	2.51	1.89	3.08
Mapoly0010s0110	1	20.53	3.56	22.87
Mapoly0010s0112	1	0	0	37.24
Mapoly0010s0116	2	44.3	5.75	40.83
Mapoly0010s0117	2	101.28	2.39	150.8
Mapoly0010s0119	2	-1.2	1.03	-1.98
Mapoly0010s0136	2	-1.08	-1.95	-3.31
Mapoly0010s0137	1	3.99	0	99.52
Mapoly0010s0138	2	2.36	-6.58	16.92
Mapoly0010s0141	1	1.39	-7.21	1.05
Mapoly0010s0149	1	-1.04	-1.06	2.51
Mapoly0010s0181	1	1.53	1.67	-1.19
Mapoly0010s0184	2	-1.48	-11.86	2.51
Mapoly0010s0207	2	-1.24	-1.32	8.82
Mapoly0010s0208	2	-1.45	1.57	3.44
Mapoly0010s0210	1	-1.23	-1.95	-5.43
Mapoly0010s0218	2	2.17	-2.67	-2.36
Mapoly0011s0009	2	-1.16	-4.67	2.48
Mapoly0011s0020	2	-1.56	1.09	-8.03
Mapoly0011s0038	1	-1.16	1.51	-1.15
Mapoly0011s0040	2	1.93	-1.3	-1.12
Mapoly0011s0045	2	1.03	-1.63	-5.26
Mapoly0011s0046	2	1.13	1.45	-2.32
Mapoly0011s0064	2	-1.82	-2.67	2.94
Mapoly0011s0076	1	1.39	1.26	-3.1
Mapoly0011s0121	2	-1.29	-1.2	2.26
Mapoly0011s0127	2	4.14	1.46	3.39
Mapoly0011s0132	2	1.08	1.6	-1.01
Mapoly0011s0139	1	3.17	1.09	-1.11
Mapoly0011s0143	1	1.48	3.41	1.7
Mapoly0011s0145	1	-1.6	-1.68	-2.22
Mapoly0011s0163	1	1.49	1.53	-2.29
Mapoly0011s0176	1	1.73	1.24	1.13
Mapoly0011s0178	2	-1.8	-2.04	-1.13
Mapoly0011s0180	1	-2.15	-2.51	2.53
Mapoly0011s0184	1	1.61	1.55	-1.67
Mapoly0011s0190	2	2.19	1.67	-1.17
Mapoly0011s0193	1	-2.58	-2.74	1.28
Mapoly0011s0209	2	1.15	2.09	1.49
Mapoly0011s0213	2	-1.16	1.09	-1.79
Mapoly0012s0007	1	2.04	2.84	2.52
Mapoly0012s0015	2	-5	1.96	-1.75
Mapoly0012s0027	2	-1.58	-8.83	-28.67
Mapoly0012s0028	2	-3.21	-18.36	-9.98
Mapoly0012s0029	2	1.47	-1.07	-2.17
Mapoly0012s0034	1	1.31	-1.12	-2.19
Mapoly0012s0053	1	1.05	-1.07	1.69
Mapoly0012s0061	2	-2.7	1.81	0
Mapoly0012s0067	1	2.77	4.21	0
Mapoly0012s0071	2	1.2	2.9	-1.86
Mapoly0012s0074	2	-1.33	-1.34	3.82
Mapoly0012s0076	1	-4.07	-2.49	-1.46
Mapoly0012s0085	1	1.3	1.55	-2.36
Mapoly0012s0086	2	2.15	2.47	-1.84
Mapoly0012s0090	2	0	0	27.01
Mapoly0012s0106	2	1.95	1.33	-1.82
Mapoly0012s0128	2	2.88	2.17	2.16
Mapoly0012s0172	2	-1.3	1.11	1.69
Mapoly0012s0175	2	1.25	1.6	-2.89
Mapoly0012s0198	2	1.33	1.4	2.78
Mapoly0012s0202	1	1.11	1.56	-2.2
Mapoly0012s0210	2	5.55	-3.75	-1.08
Mapoly0013s0015	2	1.6	1.2	2.2
Mapoly0013s0016	2	-1.2	-1.56	-1.71
Mapoly0013s0031	1	0	0	8.19
Mapoly0013s0039	2	2.88	1.84	4.21
Mapoly0013s0043	2	-1.13	-22.01	2.76
Mapoly0013s0050	2	-2.29	-2.78	1.39
Mapoly0013s0058	1	3.38	9.36	2.01
Mapoly0013s0063	1	-1.04	-1.12	1.51
Mapoly0013s0085	2	2.28	1.09	-1.56
Mapoly0013s0108	1	-1.63	-1.32	-1.61
Mapoly0013s0111	1	1.38	1.51	-1.67
Mapoly0013s0114	2	1.37	1.03	-3.26
Mapoly0013s0116	1	-4.1	-3.81	-9.32
Mapoly0013s0125	2	-1.39	-4.36	8.74
Mapoly0013s0133	2	-1.78	-1.74	-3.1
Mapoly0013s0150	2	1.13	1.58	-1.54
Mapoly0013s0156	1	2.97	1.98	-7.46
Mapoly0013s0160	1	2.44	-1.42	-2.47
Mapoly0013s0181	1	2.55	1.21	-2.89
Mapoly0013s0199	2	1.02	1.28	-2.24
Mapoly0013s0204	2	1.63	1.41	-2.02
Mapoly0014s0007	1	1.24	1.08	4.25
Mapoly0014s0024	1	-2.16	1.64	-1.41
Mapoly0014s0035	2	1.23	-1.59	-3.99
Mapoly0014s0043	1	-1.57	1.04	1.05
Mapoly0014s0048	1	1.57	1.34	-1.87
Mapoly0014s0056	2	-1.62	-1.23	-1.18
Mapoly0014s0057	1	-1.22	1.42	-4.03
Mapoly0014s0059	1	-5.01	-2.56	-1.43
Mapoly0014s0068	1	1.05	1.57	-2.35
Mapoly0014s0070	2	-1.47	-1.52	-1.19
Mapoly0014s0071	2	-1.1	-1.04	-1.69
Mapoly0014s0081	1	-1.16	-1.83	2.06
Mapoly0014s0083	1	1.39	-1.99	-1.53
Mapoly0014s0088	1	1.03	3.18	0
Mapoly0014s0094	1	1.06	1.22	-1.95
Mapoly0014s0109	1	1.08	-1.19	-4.03
Mapoly0014s0111	1	1.38	-1.18	1.56
Mapoly0014s0124	1	2.89	2.42	3.45
Mapoly0014s0130	2	1.57	1.58	-2.2
Mapoly0014s0132	2	-1.11	1.8	-2.09
Mapoly0014s0137	2	-1.2	-1.58	1.78
Mapoly0014s0144	1	-1.41	1.26	-4.62
Mapoly0014s0160	2	-1.25	-1.93	1.79
Mapoly0014s0163	2	1.26	-4.72	4.76
Mapoly0014s0172	2	1.18	-1.33	2.92
Mapoly0014s0176	1	1.23	-1.22	1.97
Mapoly0014s0177	1	1.05	-1.19	2.07
Mapoly0014s0182	1	-1.31	-1.15	-6.7
Mapoly0014s0197	1	-1.02	1.85	-1.1
Mapoly0014s0201	1	1.24	1.22	1.58
Mapoly0014s0203	2	-1.27	-1.44	-1.29
Mapoly0015s0008	2	-2.13	-1.43	-1.22
Mapoly0015s0018	2	-1.72	-1.34	-1.52
Mapoly0015s0029	1	-1.4	-1.53	1.34
Mapoly0015s0034	2	1.29	-1.21	2.63
Mapoly0015s0035	1	-1.56	-1.33	1.45
Mapoly0015s0036	2	-1.71	1.55	-5.93
Mapoly0015s0037	2	-2.06	1.26	-6.42
Mapoly0015s0041	2	1.13	1.09	-1.7
Mapoly0015s0060	2	1.51	1.21	-2.06
Mapoly0015s0062	2	-1.51	1.11	1.33
Mapoly0015s0068	2	-1.49	-1.16	-1.59
Mapoly0015s0074	1	1.12	1.29	-1.92
Mapoly0015s0077	1	-1.28	-2.03	4.04
Mapoly0015s0093	1	1.13	-1.63	-1.24
Mapoly0015s0096	1	4.02	1.2	9.85
Mapoly0015s0102	1	-1.25	-1.33	1.53
Mapoly0015s0133	1	5.27	6.79	0
Mapoly0015s0138	2	-1.37	-1.12	-1.73
Mapoly0015s0142	1	1.1	-2.7	1.79
Mapoly0015s0144	2	-1.3	-1.19	1.99
Mapoly0015s0150	2	1.57	1.58	-4.81
Mapoly0015s0158	2	1.11	1.15	-1.74
Mapoly0015s0159	1	-1.14	-2.2	-4.15
Mapoly0015s0162	2	-1.18	-1.08	1.57
Mapoly0015s0178	1	3.6	1.26	3.32
Mapoly0015s0182	2	-1.16	-1.01	-1.97
Mapoly0015s0188	1	1.47	-1.15	-3.27
Mapoly0015s0192	2	1.26	1.84	2.87
Mapoly0015s0198	1	1.99	-1.18	-2.02
Mapoly0015s0207	1	2.07	9.02	-1.57
Mapoly0016s0009	2	-1.36	1.5	12.29
Mapoly0016s0013	1	1.69	1.11	1.97
Mapoly0016s0029	1	1.4	1.06	1.63
Mapoly0016s0035	1	1.09	1.28	-1.74
Mapoly0016s0046	2	1.55	1.03	1.03
Mapoly0016s0050	1	2.47	-1.25	2.55
Mapoly0016s0055	2	-1.18	1.04	1.87
Mapoly0016s0064	2	-1.32	-1.06	1.48
Mapoly0016s0066	2	-1.08	-1.45	-2.33
Mapoly0016s0073	2	-1.3	1.16	1.5
Mapoly0016s0074	2	-3.89	-9.52	-8.02
Mapoly0016s0075	1	-11.03	-5.07	-7.32
Mapoly0016s0076	2	-1.07	-1.06	-1.52
Mapoly0016s0090	1	1.33	1.21	-2.49
Mapoly0016s0093	2	1.3	2.09	-3.05
Mapoly0016s0100	2	1.91	1.28	3.68
Mapoly0016s0101	2	-1.05	-1.2	1.56
Mapoly0016s0117	2	-16.95	-26.44	-6.03
Mapoly0016s0125	1	-1.03	1.35	2.7
Mapoly0016s0129	2	-1.03	-1.08	1.79
Mapoly0016s0134	1	1.23	1.48	-1.63
Mapoly0016s0140	2	1.76	1.44	1.1
Mapoly0016s0146	2	-1.83	-2.12	-1.36
Mapoly0016s0172	1	1.34	1.58	-2.74
Mapoly0016s0174	1	-1.02	-1.2	-1.53
Mapoly0016s0181	1	1.99	1.52	-1.88
Mapoly0016s0183	2	1.24	-1.32	1.51
Mapoly0016s0188	2	1.02	-1.36	1.76
Mapoly0016s0189	2	-1.15	-1.81	2.31
Mapoly0016s0193	2	1.42	-1.27	3.18
Mapoly0016s0194	1	1.46	1.81	1.68
Mapoly0016s0197	1	-1.71	-1.26	1.25
Mapoly0016s0206	2	-1.09	-1.43	1.28
Mapoly0016s0207	2	-1.71	1.02	-1.35
Mapoly0016s0209	2	3.04	-1.36	22.89
Mapoly0019s0001	2	1.26	1.09	2.62
Mapoly0019s0013	1	-1.03	1.56	-1.06
Mapoly0019s0014	1	1.74	1.27	-1.77
Mapoly0019s0058	2	-1.17	-1.59	1.4
Mapoly0019s0061	2	1.75	-1	1.85
Mapoly0019s0062	2	1.55	-1.02	2.04
Mapoly0019s0068	1	-1.19	1.19	3.79
Mapoly0019s0083	1	-1.44	1.12	-4.13
Mapoly0019s0090	2	1.06	-1.55	2.19
Mapoly0019s0094	1	-1.06	-1.63	1.24
Mapoly0019s0101	2	-1.13	-1.19	1.62
Mapoly0019s0102	2	1.2	-1.42	2.55
Mapoly0019s0105	2	-1.27	-1.24	1.94
Mapoly0019s0117	2	1.56	4.3	2.51
Mapoly0019s0119	2	-1.06	-1.07	-2.72
Mapoly0019s0140	2	-1.32	-1.96	1.26
Mapoly0019s0162	2	1.85	1.7	1.48
Mapoly0019s0181	2	1.23	-1.4	-7.3
Mapoly0020s0004	2	2.21	1.91	-2.24
Mapoly0020s0009	2	-1.18	-3.66	-1.26
Mapoly0020s0012	2	-2.07	-2.45	-3.26
Mapoly0020s0019	1	1.23	1.15	1.52
Mapoly0020s0028	2	2.62	-1.43	1.75
Mapoly0020s0060	2	-1.13	1.31	1.92
Mapoly0020s0075	2	1.03	-1.16	1.87
Mapoly0020s0085	2	-1.3	-2.47	-1.6
Mapoly0020s0090	1	-1.22	1.08	-2.54
Mapoly0020s0100	2	1.34	-1.18	-4.41
Mapoly0020s0104	1	1.07	1.15	2.63
Mapoly0020s0105	1	1.27	-1.35	3.53
Mapoly0020s0111	1	1.75	-1.23	-1.78
Mapoly0020s0123	1	-1.55	-1.5	1.07
Mapoly0020s0131	1	-1.54	-1.58	2.12
Mapoly0020s0133	2	1.04	1.71	1.27
Mapoly0020s0136	2	-1.14	-1.67	1.46
Mapoly0020s0141	2	-1.66	1.27	1.62
Mapoly0020s0153	2	-1.82	1.38	-1.23
Mapoly0020s0166	2	-1.28	-1.52	-1
Mapoly0020s0168	2	1.19	-1.37	1.99
Mapoly0020s0173	2	-2.3	-3.04	-2.14
Mapoly0021s0014	2	1.13	1.59	-1.71
Mapoly0021s0034	2	-1.01	1.41	10.45
Mapoly0021s0036	1	1.13	-1.77	2.61
Mapoly0021s0037	2	1.9	-3.53	14.01
Mapoly0021s0042	1	-1.51	1.52	-1.47
Mapoly0021s0048	1	2.26	-2.18	3.22
Mapoly0021s0054	2	-1.11	1.17	-1.59
Mapoly0021s0070	2	-1.16	-3	1.98
Mapoly0021s0075	2	1.28	-1.23	1.83
Mapoly0021s0082	2	1.14	1.57	-1.42
Mapoly0021s0084	2	1.06	1.15	-1.66
Mapoly0021s0085	1	1.04	1.19	-1.54
Mapoly0021s0091	1	-1.28	1.06	-5.64
Mapoly0021s0104	2	-3.09	-10.13	-1.9
Mapoly0021s0108	2	1.01	1.04	-3.44
Mapoly0021s0126	1	1.61	-1.25	1.29
Mapoly0021s0129	1	-3.86	1.23	-2.98
Mapoly0021s0142	2	-10.64	-13.32	-5.48
Mapoly0021s0144	2	1.38	-2.44	1.84
Mapoly0021s0157	2	-1.82	1.08	-1.6
Mapoly0021s0159	1	-1.52	-2.46	-1.79
Mapoly0021s0163	1	-13.21	-8.17	-7.19
Mapoly0022s0006	2	4.85	3.36	14.86
Mapoly0022s0007	1	2.69	-1.05	2.47
Mapoly0022s0017	2	1.07	1.22	-2.56
Mapoly0022s0022	2	1.05	-2.26	-7.93
Mapoly0022s0065	2	3.07	-1.82	14.14
Mapoly0022s0067	1	2.11	-1.04	2.92
Mapoly0022s0073	2	13.19	0	32.15
Mapoly0022s0080	2	2.09	-2.55	-8.05
Mapoly0022s0098	2	-1.28	-1.08	1.66
Mapoly0022s0115	2	1.1	1.38	-1.62
Mapoly0022s0120	2	1.67	1.13	2.68
Mapoly0022s0132	1	1.71	2.2	-6.48
Mapoly0022s0134	2	-2.03	-1.98	-2.92
Mapoly0022s0139	2	-1.35	-1.48	-5.24
Mapoly0022s0145	1	-3.07	2.05	2.62
Mapoly0022s0149	1	-1.2	-1.15	1.26
Mapoly0022s0152	2	-2.09	-1.99	-1.46
Mapoly0022s0154	1	-1.18	1.22	-2.42
Mapoly0022s0183	2	-1.13	-1.39	-3.2
Mapoly0022s0190	1	-1.46	-2.73	-5.81
Mapoly0023s0003	1	1.44	-2.27	-2.6
Mapoly0023s0004	2	-6.22	-19.5	-24.27
Mapoly0023s0012	1	-1.28	-3.01	-9.73
Mapoly0023s0015	2	1.77	-2.04	-5.63
Mapoly0023s0027	1	-1.06	2.05	-2.23
Mapoly0023s0036	2	-1.22	-3.28	1.51
Mapoly0023s0041	2	-1.57	-1.12	-1.29
Mapoly0023s0057	1	-1.5	-1.35	2.31
Mapoly0023s0066	1	-1.69	-1.27	1.25
Mapoly0023s0071	1	-1.01	-1.17	1.53
Mapoly0023s0078	1	1.23	1.07	1.39
Mapoly0023s0079	1	1.19	1.75	1.15
Mapoly0023s0088	2	1.64	-1.1	-2.02
Mapoly0023s0090	2	-1.32	-1.16	-1.6
Mapoly0023s0094	1	2.1	2.74	2.94
Mapoly0023s0104	2	1.76	1.29	2.32
Mapoly0023s0107	2	1.06	1	1.52
Mapoly0023s0108	2	-26.86	-1.8	-4.88
Mapoly0023s0114	1	1.5	-5.66	-2.53
Mapoly0023s0130	2	1.05	1.72	-1.64
Mapoly0023s0131	1	-1.53	-1.35	-1.2
Mapoly0023s0134	1	1.74	1.87	1.25
Mapoly0023s0135	1	-1.78	-1.11	1.55
Mapoly0023s0143	1	-1.11	1.27	-1.7
Mapoly0023s0154	1	1.02	1.17	2.49
Mapoly0023s0166	2	1.24	2.8	2.56
Mapoly0023s0167	2	1.43	2.71	1.91
Mapoly0023s0171	2	-2.14	1.8	-17.76
Mapoly0023s0177	2	1.17	2.07	1.31
Mapoly0024s0003	1	-1.63	-1.02	-3.98
Mapoly0024s0004	2	3.12	1.83	0
Mapoly0024s0017	2	-1.09	-1.2	-1.76
Mapoly0024s0023	1	1.18	1.22	-1.55
Mapoly0024s0024	1	1.29	-1.14	1.54
Mapoly0024s0033	2	-1.15	1.81	5.73
Mapoly0024s0048	1	1.37	1.4	-1.87
Mapoly0024s0070	2	1.39	1.19	-1.97
Mapoly0024s0076	2	-1.28	-1.25	-1.52
Mapoly0024s0085	2	-1.65	1.31	1.27
Mapoly0024s0090	2	1.09	1.29	-2.08
Mapoly0024s0110	2	1.16	-1	-2.25
Mapoly0024s0120	1	-1.53	1	-1.52
Mapoly0024s0128	1	2.07	1.33	-1.17
Mapoly0024s0135	1	-1.03	1.64	-2.45
Mapoly0025s0002	1	-1.09	1.12	-1.75
Mapoly0025s0006	2	-1.21	-1.53	-2.87
Mapoly0025s0012	2	-1.64	-1.04	-2.05
Mapoly0025s0022	2	2.37	-1.13	4.14
Mapoly0025s0029	1	-1	-1.08	2.24
Mapoly0025s0030	1	54.69	1.38	12.79
Mapoly0025s0048	1	6.33	-1.65	4.9
Mapoly0025s0057	2	1.93	-2.62	-1.08
Mapoly0025s0077	2	2.34	2.58	1.52
Mapoly0025s0084	2	-1.6	1.35	1.86
Mapoly0025s0085	1	2.29	2.06	-1.28
Mapoly0025s0092	2	1.33	1.97	-1.91
Mapoly0025s0096	2	1.31	1.31	-1.63
Mapoly0025s0114	2	-1.48	1.18	-2.51
Mapoly0025s0117	2	1.13	2.4	-1.25
Mapoly0025s0131	1	-1.71	-2.12	1.28
Mapoly0026s0012	2	-1.25	-1.62	-2.98
Mapoly0026s0021	1	1.45	1.57	1.4
Mapoly0026s0042	2	-1.9	-2.03	-2.19
Mapoly0026s0060	2	-1.27	-1.07	-1.33
Mapoly0026s0065	2	-1.25	-5.27	2.01
Mapoly0026s0074	2	1.01	-1.15	1.57
Mapoly0026s0077	2	-1.07	1.37	-1.9
Mapoly0026s0078	2	2.04	1.99	1.21
Mapoly0026s0080	2	-3.41	-1.13	1.01
Mapoly0026s0082	2	1.03	1.28	1.79
Mapoly0026s0099	1	2.47	7.84	3.77
Mapoly0026s0101	2	-1.27	-1.91	-1.21
Mapoly0026s0123	2	-10.83	-7.53	-21.26
Mapoly0026s0133	2	-1.6	-1.01	-1.03
Mapoly0026s0145	2	2.46	2.38	0
Mapoly0027s0005	1	1.03	1.09	-1.52
Mapoly0027s0009	2	-8.17	-1.46	2.02
Mapoly0027s0010	1	1.17	1.48	-1.34
Mapoly0027s0038	2	1.3	1.39	-3.96
Mapoly0027s0039	2	-1	-1.19	-1.67
Mapoly0027s0052	1	-1.85	-4.39	-3.74
Mapoly0027s0053	2	-1.49	-1.5	-1.86
Mapoly0027s0065	2	7.37	0	0
Mapoly0027s0068	1	-1.39	-1.28	-1.8
Mapoly0027s0070	2	-1.18	-1.05	1.79
Mapoly0027s0079	2	1.33	-2.77	-34.62
Mapoly0027s0080	2	-1.03	-2.26	-44.19
Mapoly0027s0087	2	2.12	1.58	-10.4
Mapoly0027s0103	2	1.63	1.27	-3.26
Mapoly0027s0106	2	1.09	1.42	-1.96
Mapoly0027s0109	2	-1.68	-1.73	28.4
Mapoly0027s0112	2	-1.05	-1.38	-2.84
Mapoly0027s0120	1	-1.54	1.1	1.54
Mapoly0027s0125	2	-2.47	-1.59	1.13
Mapoly0027s0135	1	0	0	7.06
Mapoly0027s0136	2	-1.18	-1.69	1.4
Mapoly0027s0141	1	-1.73	-1.47	-1.06
Mapoly0027s0161	2	3.14	5.77	-4.16
Mapoly0027s0162	1	3.05	7.39	-3.43
Mapoly0027s0165	2	1.54	3.16	-3.87
Mapoly0027s0170	2	1.4	3.01	-4.16
Mapoly0027s0171	1	1.92	3	-1.9
Mapoly0027s0173	1	-2.5	-75.53	-1.7
Mapoly0027s0175	2	-1.84	-2.36	-2.95
Mapoly0027s0176	2	1.33	-1.05	-2.44
Mapoly0028s0002	2	1.24	1.49	1.29
Mapoly0028s0011	2	-1.68	-1.33	-1.37
Mapoly0028s0016	1	-1.75	-1.21	-1.07
Mapoly0028s0018	2	-2.06	-1.93	-1.01
Mapoly0028s0019	1	-1.75	-1.05	-1.49
Mapoly0028s0030	2	1.73	1.04	1.21
Mapoly0028s0039	2	1.04	-1.38	-1.68
Mapoly0028s0046	2	1.17	1.52	-1.21
Mapoly0028s0054	2	2.34	-1.77	-9.24
Mapoly0028s0058	1	3.49	-1.18	84.26
Mapoly0028s0062	2	1.84	1.8	3.56
Mapoly0028s0065	2	-1.43	-1.53	-12.87
Mapoly0028s0068	2	1.35	-1.16	1.58
Mapoly0028s0080	2	-1.67	1.73	-1.67
Mapoly0028s0086	1	-2.48	-1.87	3.3
Mapoly0028s0088	2	1.8	1.21	5.61
Mapoly0028s0106	1	-1.24	-1.6	-1.34
Mapoly0028s0113	1	-1.31	1.04	1.57
Mapoly0028s0125	2	1.07	2.78	1.36
Mapoly0028s0130	2	1.05	-1.11	1.62
Mapoly0028s0134	2	1.05	-1.13	-2.05
Mapoly0028s0141	2	-1.12	-1.1	-2.46
Mapoly0028s0142	2	1.61	1.35	1.14
Mapoly0028s0146	1	1.59	1.65	-1.61
Mapoly0029s0020	2	1.15	1.43	-2.43
Mapoly0029s0021	2	2.59	-1.38	-2.19
Mapoly0029s0025	2	1.53	1.06	1.31
Mapoly0029s0027	1	1.55	-1.3	2.62
Mapoly0029s0040	2	1.36	1.57	-8.91
Mapoly0029s0052	1	1.07	1.54	-1
Mapoly0029s0077	2	1.29	1.63	-1.56
Mapoly0029s0107	1	-1.04	-1.34	1.66
Mapoly0029s0121	2	-1.04	-1.16	-1.85
Mapoly0029s0131	1	1.62	4.74	1.47
Mapoly0029s0133	1	-3.21	1.7	-1.78
Mapoly0029s0136	1	-1.23	-1.57	-2.13
Mapoly0029s0142	2	1.27	1.87	1.49
Mapoly0029s0144	2	-1.77	2.89	10507.6
Mapoly0029s0149	2	-14.15	-9.6	-30.46
Mapoly0030s0004	2	2.7	1.58	1.2
Mapoly0030s0005	1	1.71	-2.69	2.74
Mapoly0030s0012	2	-1.33	1.09	-1.71
Mapoly0030s0020	2	-1.27	-1.21	-7.04
Mapoly0030s0034	2	-2.93	1.46	0
Mapoly0030s0048	1	-1.65	-1.03	1.17
Mapoly0030s0067	1	1.51	1.31	-1.4
Mapoly0030s0074	2	2.21	1.82	-2.41
Mapoly0030s0084	1	-3.41	-1.76	-1.2
Mapoly0030s0103	2	1.38	1.11	-1.8
Mapoly0030s0107	2	1.8	1.38	1.05
Mapoly0030s0115	2	2.68	3.27	-1.94
Mapoly0030s0118	1	1.84	1.26	-2.15
Mapoly0030s0120	2	1.69	-1.33	2.41
Mapoly0030s0131	2	1.2	1.27	-1.57
Mapoly0030s0143	2	1.55	1.18	-1.12
Mapoly0031s0018	2	-1.29	-24.09	-6.84
Mapoly0031s0022	2	-1.07	-1.14	-4.64
Mapoly0031s0029	1	5.32	-1.3	1.31
Mapoly0031s0035	2	-1.2	-2.4	1.03
Mapoly0031s0046	2	1.48	1.3	2.62
Mapoly0031s0055	1	1.07	3.32	-1.76
Mapoly0031s0057	1	1.03	-3.85	-4.16
Mapoly0031s0067	2	-1.68	-1.66	-3.9
Mapoly0031s0071	2	-1.6	1.66	-2.35
Mapoly0031s0088	1	1.32	1.46	-1.69
Mapoly0031s0092	2	1.84	-1.45	1.24
Mapoly0031s0097	2	-3.12	-1.86	1.1
Mapoly0031s0109	1	1.14	-2.29	1.05
Mapoly0031s0115	2	1.37	2.1	-1.25
Mapoly0031s0123	1	1.41	1.56	-1.5
Mapoly0031s0128	2	1.18	-1.09	-2.11
Mapoly0031s0135	1	-1.12	-1.19	3.37
Mapoly0031s0145	1	1.16	-1.24	2.02
Mapoly0031s0147	2	-1.78	1.37	-1.3
Mapoly0031s0148	2	1.11	1.03	-1.65
Mapoly0031s0150	2	-1.73	1.13	-1.19
Mapoly0031s0151	2	1.01	1.61	-1.32
Mapoly0031s0164	2	-1.11	-1.09	-3.03
Mapoly0031s0188	2	2.3	1.37	1.43
Mapoly0031s0192	2	1.79	1.18	-1.99
Mapoly0032s0016	2	1.88	1.41	2.73
Mapoly0032s0017	2	1.19	1.73	-2.72
Mapoly0032s0021	2	1.66	1.31	1.19
Mapoly0032s0025	1	1.29	1.8	-1.49
Mapoly0032s0039	1	-1.47	-1.49	2.33
Mapoly0032s0042	1	1.06	1.05	-1.74
Mapoly0032s0044	2	1.57	1.29	-1.01
Mapoly0032s0051	2	-1.11	-1.1	-3.45
Mapoly0032s0056	2	1.2	-5.1	-3.22
Mapoly0032s0072	1	-2.84	-3.04	-3062.14
Mapoly0032s0073	1	-4.12	-21.66	-1.13
Mapoly0032s0074	2	1.24	-3.26	-2.92
Mapoly0032s0077	2	1.91	1.49	-8.75
Mapoly0032s0090	2	1.18	1.46	-3.98
Mapoly0032s0095	2	-1.24	1.89	-1.52
Mapoly0032s0097	1	-1.56	-1.66	2.56
Mapoly0032s0099	2	1.29	1.22	-1.36
Mapoly0032s0104	2	-1.68	1.07	-1.14
Mapoly0032s0111	2	1.36	1.25	-2.52
Mapoly0032s0113	2	1.11	1.22	1.97
Mapoly0032s0119	2	1.06	-1	-4.28
Mapoly0032s0130	2	1.48	1.21	-2.54
Mapoly0032s0136	2	1.25	2.25	-1.32
Mapoly0032s0137	2	1.36	1.78	-1.72
Mapoly0032s0142	2	1.58	-3.8	3.85
Mapoly0032s0144	1	1.93	-1.04	3.68
Mapoly0032s0146	2	1.4	1.61	-2.6
Mapoly0032s0153	1	1.07	1.01	1.51
Mapoly0032s0157	1	1.28	-1.66	6.57
Mapoly0032s0158	2	13.2	0	89.5
Mapoly0032s0167	2	-1.23	-1.19	2.08
Mapoly0033s0014	1	1.24	-1.1	1.51
Mapoly0033s0019	2	-1.56	-1.31	1.52
Mapoly0033s0023	2	-3.33	-1.15	-1.35
Mapoly0033s0038	2	2.43	4.96	2.15
Mapoly0033s0050	2	-1.82	-1.63	-1.33
Mapoly0033s0053	1	-1.28	-1.55	1.37
Mapoly0033s0061	1	1.08	-1.79	1.33
Mapoly0033s0062	2	1.22	-3.35	-1.56
Mapoly0033s0066	2	-1.29	-1.04	-1.59
Mapoly0033s0076	2	1.03	1.36	-2.43
Mapoly0033s0083	2	-1.5	1.55	1.04
Mapoly0033s0098	2	-1.02	-1.06	-1.72
Mapoly0033s0103	2	2.21	1.86	-17.84
Mapoly0033s0108	2	-2.13	-2.38	1
Mapoly0033s0109	2	-2.35	-1.58	-1.32
Mapoly0033s0127	2	-1.01	1.25	1.79
Mapoly0033s0131	1	1.13	-1.24	1.77
Mapoly0033s0134	2	1.13	-1.19	-1.53
Mapoly0033s0145	2	-1.08	1	-5.16
Mapoly0033s0146	2	-1.21	1.5	-1.53
Mapoly0033s0147	2	5.67	0	3.17
Mapoly0033s0151	2	1.04	1.24	-1.81
Mapoly0033s0170	1	-1.77	1.77	-1.71
Mapoly0034s0010	2	-1.19	-1.18	1.72
Mapoly0034s0011	1	-1.7	1.27	-1.42
Mapoly0034s0025	2	1.65	1.28	-2.07
Mapoly0034s0044	2	-1.88	-1.25	1.47
Mapoly0034s0047	1	-5.79	-4.51	-8
Mapoly0034s0051	2	-1.09	-1.13	1.68
Mapoly0034s0062	2	-2.59	-3.92	-3.47
Mapoly0034s0065	2	-1.97	-1.06	-2.02
Mapoly0034s0090	2	1.08	-2.43	2.78
Mapoly0034s0091	1	1.52	1.47	-1.96
Mapoly0034s0107	1	-1.28	1.11	-2.84
Mapoly0034s0109	1	1.69	1.74	1.15
Mapoly0034s0121	1	1.43	-1.57	1.75
Mapoly0034s0126	2	1.3	1.61	1.93
Mapoly0034s0127	1	1.11	1.33	-2.54
Mapoly0034s0131	2	2.72	2.38	-21.38
Mapoly0034s0139	2	1.95	1.01	6.04
Mapoly0035s0005	2	-1.73	1.18	1.06
Mapoly0035s0018	2	2.94	1.43	2.4
Mapoly0035s0027	2	1.62	-1.1	2.21
Mapoly0035s0030	1	1.15	1.22	-1.59
Mapoly0035s0034	1	1.52	1.35	1.08
Mapoly0035s0043	2	-2.79	-1.26	10.48
Mapoly0035s0060	2	1.47	1.29	2.27
Mapoly0035s0070	2	-2.05	-2.63	-1.14
Mapoly0035s0096	2	1.22	1.48	-1.99
Mapoly0035s0111	2	1.3	1.61	1.06
Mapoly0035s0141	2	-3.49	-6.84	-1.32
Mapoly0035s0151	1	2.09	1.81	-1.55
Mapoly0036s0003	2	-1.43	-3.52	-3.81
Mapoly0036s0005	2	-1.3	-1.35	2.31
Mapoly0036s0007	2	1.87	1.12	-3.5
Mapoly0036s0008	2	-1.73	1.7	2.72
Mapoly0036s0013	2	-1.18	-3.49	-4.4
Mapoly0036s0014	2	3.03	3.57	-2.18
Mapoly0036s0017	1	-1.15	1.26	-2.21
Mapoly0036s0018	1	-1.49	-1.62	1.06
Mapoly0036s0019	2	-2.37	-3.06	-1
Mapoly0036s0027	1	2.07	2.57	3.71
Mapoly0036s0044	2	-1.66	-1.28	-1.97
Mapoly0036s0062	1	2.81	-1.58	8.99
Mapoly0036s0066	2	-2.52	1.05	-1.28
Mapoly0036s0082	1	1.44	1.14	2.48
Mapoly0036s0092	2	1.14	1.38	1.67
Mapoly0036s0094	2	2.03	1.57	-2.28
Mapoly0036s0098	2	2.21	1.32	-3.79
Mapoly0036s0120	2	1.84	-1.49	-3.51
Mapoly0036s0126	2	1.1	1.57	-1.39
Mapoly0036s0153	1	1	-1.18	-1.81
Mapoly0037s0009	2	1.27	-1.02	4.28
Mapoly0037s0028	2	1.21	1.53	-1.13
Mapoly0037s0043	2	-1.02	-1.23	-4.3
Mapoly0037s0056	2	1.23	1.13	1.53
Mapoly0037s0067	2	1.28	1.37	-1.83
Mapoly0037s0074	1	-1.11	-1.14	1.22
Mapoly0037s0075	2	1.06	-2.84	-26.73
Mapoly0037s0079	2	-1.12	-1.97	-2.38
Mapoly0037s0086	1	1.48	1.02	-1.98
Mapoly0037s0088	2	2.4	2.69	-5.38
Mapoly0037s0097	1	-1.13	1.19	1.66
Mapoly0037s0104	1	-1.45	1.28	-2.05
Mapoly0037s0111	1	-1.25	-1.46	2.11
Mapoly0037s0116	1	-1.69	-3.67	-14.35
Mapoly0037s0118	1	2.24	-1.07	-1.94
Mapoly0037s0119	2	1.19	1.03	-2.84
Mapoly0037s0127	1	1.73	-1.42	4.22
Mapoly0037s0129	2	-15.09	-5.57	-1.75
Mapoly0037s0131	2	-1.54	-1.3	1.19
Mapoly0037s0136	1	1.56	-1.1	7.21
Mapoly0037s0138	2	1.16	-1.16	1.58
Mapoly0038s0001	1	-1.75	-8.5	-48.72
Mapoly0038s0004	2	-1.7	-1.52	-2.12
Mapoly0038s0007	2	-2.88	-1.93	3.39
Mapoly0038s0013	1	-1.17	-1.11	-1.81
Mapoly0038s0022	2	1.22	1.06	-2.27
Mapoly0038s0023	2	1.21	-1.11	-1.6
Mapoly0038s0025	1	-1.87	-1.4	-6.09
Mapoly0038s0034	2	1.35	1.63	-1.15
Mapoly0038s0038	2	1.17	1.35	-2.09
Mapoly0038s0040	1	-1.54	-4.92	-4.62
Mapoly0038s0066	2	-1.22	-1.17	2.06
Mapoly0038s0075	1	1.18	-1.06	2.44
Mapoly0038s0083	1	1.14	-1.4	-2.79
Mapoly0038s0086	1	1.67	1.17	-1.93
Mapoly0038s0098	2	1.29	1.3	-2.54
Mapoly0038s0107	2	-1.5	-1	-2.06
Mapoly0038s0108	2	-1.06	-1.32	1.93
Mapoly0038s0112	2	1.23	-1.38	-3.8
Mapoly0038s0113	2	1.13	-1.27	-3.88
Mapoly0039s0013	1	1.02	1.09	1.64
Mapoly0039s0021	1	1.17	-1.81	1.94
Mapoly0039s0038	1	1.29	1.05	1.54
Mapoly0039s0044	2	2.55	-1.84	-4.88
Mapoly0039s0045	2	2.19	-4.77	-1.64
Mapoly0039s0047	2	-1.3	-1.06	-2.15
Mapoly0039s0050	2	3.49	1.59	2.07
Mapoly0039s0053	2	1.19	1.02	-2.54
Mapoly0039s0057	2	-7.96	-10.91	6.03
Mapoly0039s0077	1	-1.39	-1.08	-2.2
Mapoly0039s0078	2	1.17	1.67	-2.01
Mapoly0039s0079	1	1.11	1.58	-4.98
Mapoly0039s0082	1	-2.74	0	0
Mapoly0039s0085	1	2.92	-1.2	4.04
Mapoly0039s0086	2	1.34	1.26	-2.07
Mapoly0039s0106	2	-1.03	-1.63	1.97
Mapoly0039s0113	2	-1.19	-2.97	-1.42
Mapoly0039s0117	2	1.8	1.43	-2.97
Mapoly0039s0120	1	-1.31	1.07	-1.82
Mapoly0040s0005	2	1.53	1.71	1.94
Mapoly0040s0008	2	1.81	1.35	-1.37
Mapoly0040s0024	2	16.79	1.5	31.85
Mapoly0040s0025	2	1.12	-1.03	1.57
Mapoly0040s0044	1	-1.77	1.38	-2.87
Mapoly0040s0052	1	-1.44	-1.43	1.9
Mapoly0040s0055	2	2.08	-8.47	13.15
Mapoly0040s0062	2	1.54	1.69	2.24
Mapoly0040s0065	1	1.06	1.04	-3.54
Mapoly0040s0080	2	0	0	35.52
Mapoly0040s0089	1	-1.63	-1.31	2.35
Mapoly0040s0099	2	1.45	1.36	-2.71
Mapoly0040s0100	2	-1.08	-1.1	1.51
Mapoly0040s0101	1	-1.33	-2.02	-1.39
Mapoly0040s0103	2	1.22	-1.33	1.79
Mapoly0040s0107	1	1.16	-1.29	1.95
Mapoly0040s0108	2	2.49	-1.12	9.21
Mapoly0040s0114	2	-1.88	-4.1	0
Mapoly0040s0116	1	1.06	-1.51	-1.52
Mapoly0040s0142	2	-3.78	-5.4	-14.62
Mapoly0041s0012	2	-1.27	1.17	-2.53
Mapoly0041s0017	1	-1.2	-3.31	-1.02
Mapoly0041s0024	2	-1.3	-1.99	-3.33
Mapoly0041s0030	1	-2.34	-1.77	-6.88
Mapoly0041s0033	2	1.29	1.21	-2.11
Mapoly0041s0034	1	1.69	1.96	-2.1
Mapoly0041s0044	2	-14.68	-2.02	-1.64
Mapoly0041s0050	2	2.75	1.44	-4.08
Mapoly0041s0058	2	-1.65	-1.55	-1.66
Mapoly0041s0063	2	2.88	2.14	-2.31
Mapoly0041s0065	1	-3.25	-1.66	-1.54
Mapoly0041s0069	1	1.82	1.26	4.81
Mapoly0041s0071	2	1.26	-3.01	-10.4
Mapoly0041s0077	2	-1.6	-1.32	1.19
Mapoly0041s0086	2	-1.34	-1.31	-1.56
Mapoly0041s0103	2	1.71	1.7	4.53
Mapoly0041s0122	1	-7.26	-7.29	-23.58
Mapoly0041s0128	1	1.96	1.06	9.19
Mapoly0041s0146	2	-1.37	-1.35	1.62
Mapoly0042s0003	2	-1.94	-2.36	-8.95
Mapoly0042s0006	1	-1.33	-1.74	1.14
Mapoly0042s0009	1	1.59	1.35	-2.22
Mapoly0042s0016	1	23.29	1.33	46.51
Mapoly0042s0025	2	-1.28	-1.26	1.81
Mapoly0042s0030	2	2	1.34	-4142.1
Mapoly0042s0040	1	-3.99	2.14	-1.12
Mapoly0042s0066	1	-1.2	-1.25	1.92
Mapoly0042s0078	2	1.51	1.02	1.1
Mapoly0042s0080	2	2.02	-1.23	2.24
Mapoly0042s0082	1	-11.1	1.51	-3.39
Mapoly0042s0085	2	1.31	1.38	-1.59
Mapoly0042s0095	1	2.73	-2.13	13.38
Mapoly0042s0096	2	1.81	-2.66	1.24
Mapoly0042s0099	1	-1.02	-3.67	-4.52
Mapoly0042s0100	1	-5.68	-8.49	-1.19
Mapoly0042s0106	2	-1.41	-1.65	-1.68
Mapoly0042s0107	2	-5.37	-4.4	-4.94
Mapoly0042s0113	2	1.19	1.02	-1.94
Mapoly0042s0115	2	-1.66	-1.66	1.04
Mapoly0042s0117	2	0	0	28.4
Mapoly0043s0001	1	1.05	-1.49	2.14
Mapoly0043s0003	2	-1.16	-1.17	1.77
Mapoly0043s0020	1	1.46	-1.14	5.58
Mapoly0043s0026	1	-1.46	-1.83	7.44
Mapoly0043s0030	1	1.55	1.38	-2.12
Mapoly0043s0045	2	1.63	-1.21	1.31
Mapoly0043s0046	2	1.4	1.41	-2.38
Mapoly0043s0053	2	-1.39	-1.97	-1.04
Mapoly0043s0064	1	1.01	1.01	-1.97
Mapoly0043s0069	1	1.34	-1.74	9.84
Mapoly0043s0071	2	-1.18	-3.24	-4.03
Mapoly0043s0072	1	1.36	1.06	-1.94
Mapoly0043s0076	2	-2.01	1.11	-1.09
Mapoly0043s0109	1	3.1	8.11	1.81
Mapoly0043s0110	1	1.26	1.24	-2.32
Mapoly0043s0115	2	1.7	1.76	-1.14
Mapoly0043s0121	2	-1.55	-1.1	-1.23
Mapoly0043s0138	2	1.06	1.52	-1.11
Mapoly0044s0008	2	2.41	-1.77	-2.17
Mapoly0044s0014	2	-1.13	-2.04	-2.2
Mapoly0044s0016	2	-2.35	-2.78	-1.44
Mapoly0044s0020	2	1.25	1.55	1.37
Mapoly0044s0027	2	-3.33	-18.12	0
Mapoly0044s0029	2	-1.66	-7.45	-53.1
Mapoly0044s0037	2	1.04	1.38	-1.72
Mapoly0044s0055	2	-2.89	-4.19	-10.39
Mapoly0044s0057	2	-1.04	-3.05	-10.33
Mapoly0044s0072	2	2.55	6.26	1.32
Mapoly0044s0076	1	1.91	1.22	3.13
Mapoly0044s0078	1	2.15	5.71	-1.36
Mapoly0044s0089	1	-2	1.72	1.88
Mapoly0044s0090	2	1.2	1.69	2.38
Mapoly0044s0102	2	-1.39	-1.61	1.08
Mapoly0044s0103	2	1.37	1.05	4.31
Mapoly0044s0110	2	1.46	1.3	1.81
Mapoly0044s0114	2	-24.25	-153.53	-2.29
Mapoly0044s0117	1	-1.38	-2.42	-1.5
Mapoly0044s0121	2	-1.02	-1.8	3.1
Mapoly0044s0122	2	2.36	-2.38	2.98
Mapoly0044s0123	1	-1.62	-5.78	11.91
Mapoly0044s0127	2	1.56	1.61	3.3
Mapoly0044s0128	1	2.01	1.43	1.09
Mapoly0044s0135	1	1.21	1.1	-1.54
Mapoly0045s0005	2	1.81	-6.08	0
Mapoly0045s0006	2	8.74	1.16	-254.96
Mapoly0045s0010	2	2.26	3.14	0
Mapoly0045s0014	2	-2.13	-1.2	-3.63
Mapoly0045s0016	2	-1.3	-1.59	2.85
Mapoly0045s0019	1	1.07	-1.31	1.91
Mapoly0045s0028	2	2.14	-1.38	-1.77
Mapoly0045s0033	1	-1.22	-1.09	-1.6
Mapoly0045s0035	1	1.56	-1.73	-2.41
Mapoly0045s0044	2	-1.02	1.01	1.6
Mapoly0045s0045	2	-2.37	-2.3	1.28
Mapoly0045s0052	1	1.39	-1.02	2.09
Mapoly0045s0058	1	-1.58	6.37	2.09
Mapoly0045s0063	1	-1.7	-1.65	2.56
Mapoly0045s0065	2	2.06	1.49	1.49
Mapoly0045s0094	2	-1.53	-2.18	1.07
Mapoly0045s0099	1	-1.64	-1.52	-2.04
Mapoly0045s0112	1	-2.6	-2.07	1.5
Mapoly0045s0113	1	1.84	-1.71	1.84
Mapoly0045s0116	2	-2.34	1.08	-2.23
Mapoly0045s0119	1	-1.48	2.84	3.22
Mapoly0045s0121	2	1.73	1.56	1.09
Mapoly0045s0125	2	1.65	1.07	-2.88
Mapoly0045s0129	2	1.32	4.99	1.56
Mapoly0045s0137	1	-1.67	-1.52	7.82
Mapoly0045s0142	2	-2.89	-2.03	-1.22
Mapoly0045s0143	2	2.19	-1.16	3.14
Mapoly0045s0145	2	2.68	-1.25	-1.81
Mapoly0045s0153	1	1.2	-1.31	1.89
Mapoly0045s0156	2	1.37	-1.05	11.87
Mapoly0046s0008	2	1.52	1.67	5.9
Mapoly0046s0009	2	1.22	1.29	2.49
Mapoly0046s0012	1	-1.55	-1.06	1.43
Mapoly0046s0013	1	-1.85	1.1	-1.1
Mapoly0046s0015	2	4.25	4.85	1.05
Mapoly0046s0016	2	-1.6	0	-9.03
Mapoly0046s0035	2	-1.07	1.37	1.64
Mapoly0046s0043	2	-1.15	1.13	1.83
Mapoly0046s0044	2	1.1	1	1.52
Mapoly0046s0046	2	1.66	1.29	-1.07
Mapoly0046s0063	2	1.62	1.79	3.87
Mapoly0046s0069	2	1.54	1.15	1.41
Mapoly0046s0070	2	1.65	1.16	1.39
Mapoly0046s0078	1	1.04	-12.11	-7.33
Mapoly0046s0092	2	1.17	1.49	-2.24
Mapoly0046s0104	1	-1.5	1.18	1.82
Mapoly0046s0106	1	1.25	1.01	1.58
Mapoly0046s0111	2	-1.13	-1.61	-2.49
Mapoly0047s0001	1	-2.44	-2.04	-3.87
Mapoly0047s0007	2	3.38	-2.97	-1.19
Mapoly0047s0020	1	-1.13	-1	1.58
Mapoly0047s0030	2	1.15	1.52	-3.68
Mapoly0047s0034	2	1.03	1.61	-6.96
Mapoly0047s0055	1	3.36	1.05	0
Mapoly0047s0065	1	1.95	1.82	2.16
Mapoly0047s0066	2	2.57	2.26	1.01
Mapoly0047s0079	2	-1.03	1.09	-1.79
Mapoly0047s0089	2	1	-1.02	-4.85
Mapoly0047s0098	2	1.55	1.08	1.21
Mapoly0047s0102	2	-1.52	-4.63	-5.52
Mapoly0047s0106	1	-1.35	-4.19	1.8
Mapoly0047s0126	1	1.67	2.02	3.14
Mapoly0048s0002	2	1.56	-2.69	22.67
Mapoly0048s0017	2	-2.6	-3.09	-1.48
Mapoly0048s0024	1	-1.53	-1.16	-1.03
Mapoly0048s0031	2	1.88	1.76	9.06
Mapoly0048s0047	2	1.17	-2.71	2.22
Mapoly0048s0057	1	1.62	1.73	1.19
Mapoly0048s0061	2	-1.03	-2.3	-2.61
Mapoly0048s0066	2	7.05	1.47	1.36
Mapoly0048s0069	2	-1.26	1.63	-1.6
Mapoly0048s0088	2	-1.15	1.52	-1.06
Mapoly0048s0094	2	-1.36	1.09	-3.67
Mapoly0048s0104	2	1.18	-1.1	1.59
Mapoly0049s0002	2	-1.29	-1.3	-3.87
Mapoly0049s0003	2	1.27	-1.28	-2.12
Mapoly0049s0008	2	-1.27	-6.3	4.8
Mapoly0049s0010	2	-1.04	-2.4	-6.15
Mapoly0049s0027	1	1.01	1.1	2.18
Mapoly0049s0042	2	1.62	1.76	-2.83
Mapoly0049s0043	2	1.05	1.6	-1.25
Mapoly0049s0056	1	1.37	1.15	-3.01
Mapoly0049s0057	2	-1.22	1.99	-1.21
Mapoly0049s0064	2	-1.42	-1.51	-1.46
Mapoly0049s0099	2	2.83	2.63	-4.4
Mapoly0049s0103	2	-2.29	-1.77	1.01
Mapoly0049s0108	1	-2.28	-3.85	-2.21
Mapoly0049s0109	2	-1.09	-1.89	-1.25
Mapoly0049s0121	2	-1.07	1.42	-2.2
Mapoly0049s0132	1	2.5	2.2	-1.35
Mapoly0050s0004	2	-7.45	-11.17	0
Mapoly0050s0006	1	-1.08	1.23	-1.54
Mapoly0050s0029	1	2.06	1.75	-5.36
Mapoly0050s0035	1	1.94	-1.52	-7.02
Mapoly0050s0041	2	-1.64	1.07	10.16
Mapoly0050s0045	2	2.35	2.34	2.88
Mapoly0050s0050	2	1.99	1.38	5.42
Mapoly0050s0057	2	1.57	1.43	-1.02
Mapoly0050s0069	1	-2.45	-2.21	1.45
Mapoly0050s0071	2	-1.72	-1.65	-1.16
Mapoly0050s0073	1	-3.18	-2.26	1.2
Mapoly0050s0080	2	1.4	-1.1	3.48
Mapoly0050s0082	2	-2.33	-3.47	-7.25
Mapoly0050s0085	1	3.04	1.37	-2.65
Mapoly0050s0087	1	1.05	1.16	2.03
Mapoly0050s0090	2	1.35	1.51	2.23
Mapoly0050s0093	2	1.2	-1.63	2.03
Mapoly0050s0098	2	1.53	1.25	-1.84
Mapoly0050s0099	1	-2.86	1.56	-1.88
Mapoly0050s0104	2	1.19	2.58	-3.39
Mapoly0050s0105	2	1.07	-1.3	1.94
Mapoly0050s0107	2	-5.48	-3.67	-3.52
Mapoly0050s0108	2	1.2	1.19	-2
Mapoly0050s0113	2	1.49	-2.02	-3.64
Mapoly0050s0120	1	1.13	-1.62	2.34
Mapoly0050s0125	1	1.72	1.09	5.73
Mapoly0050s0130	1	-1.85	-3.51	-5.18
Mapoly0050s0135	1	4.84	3.03	-3.56
Mapoly0051s0002	1	-1.05	-1.1	-3.32
Mapoly0051s0004	2	-1.08	-1.96	-1.51
Mapoly0051s0015	2	-5.59	-21.42	-2.29
Mapoly0051s0017	1	-1.21	1.73	-1.87
Mapoly0051s0023	1	-1.34	1.18	-1.59
Mapoly0051s0027	1	-1.65	1.75	-1.3
Mapoly0051s0033	2	1.51	1.32	-2.43
Mapoly0051s0047	1	1.56	-1.06	1.94
Mapoly0051s0048	2	1.64	1.13	-1.42
Mapoly0051s0049	2	3.09	1.43	1.2
Mapoly0051s0056	2	1.34	1.43	-2.29
Mapoly0051s0060	1	1.03	1.24	-2.05
Mapoly0051s0063	2	-1.14	1.88	-1.53
Mapoly0051s0077	2	-69.36	-48.96	-3.13
Mapoly0051s0085	2	-1.23	-1.14	-1.99
Mapoly0051s0086	2	-1.09	-1.17	-3.96
Mapoly0051s0089	1	1.1	-1.13	1.94
Mapoly0051s0099	2	1.24	1.29	-1.99
Mapoly0051s0107	2	1.74	1.28	2.32
Mapoly0051s0110	2	1.79	1.33	-1.47
Mapoly0051s0113	2	-1.19	1.07	-2.79
Mapoly0051s0115	1	1.29	1.4	2.69
Mapoly0052s0003	1	-1.45	1.84	0
Mapoly0052s0026	1	1.5	1.39	-3.6
Mapoly0052s0027	2	1.44	1.45	-4.08
Mapoly0052s0030	1	1.04	-1.22	1.92
Mapoly0052s0039	2	1.35	1.01	-2.73
Mapoly0052s0043	1	1.31	-1.02	1.76
Mapoly0052s0053	2	1.12	-1.24	2.02
Mapoly0052s0068	2	3.09	1.36	2
Mapoly0052s0085	2	-1.25	-1.85	-1.18
Mapoly0052s0093	2	-1.2	2.81	1.52
Mapoly0052s0131	1	1.01	1.07	3.56
Mapoly0053s0005	2	3.97	1.29	14.33
Mapoly0053s0011	1	3.05	-4.16	3.48
Mapoly0053s0013	2	-1.4	1.66	1.68
Mapoly0053s0030	2	-1.59	-1.33	-10.94
Mapoly0053s0032	2	-4.98	-6.52	1.97
Mapoly0053s0033	2	1.02	-1.41	2.61
Mapoly0053s0052	1	1.99	-1.12	2.28
Mapoly0053s0061	1	-1.74	1.11	-2.28
Mapoly0053s0065	2	1.51	-3.5	-1.39
Mapoly0053s0099	1	1.26	1.09	-1.92
Mapoly0053s0101	2	1.93	-1.06	10.46
Mapoly0053s0103	2	-1.52	1.2	-1.81
Mapoly0053s0106	2	-1.09	-1	-6.97
Mapoly0053s0108	1	-1.02	-3.1	1.71
Mapoly0054s0010	2	1.16	-1.96	8.53
Mapoly0054s0016	1	-2.02	-2.21	-3.33
Mapoly0054s0024	2	-1.91	-2.19	1.53
Mapoly0054s0031	2	-1.49	-2.03	-2.86
Mapoly0054s0042	2	2.25	-1.16	2.5
Mapoly0054s0054	1	-1.62	-1.05	1.22
Mapoly0054s0067	1	-1.05	-1.56	2.15
Mapoly0054s0093	1	-1.62	1.68	-1.99
Mapoly0054s0096	1	-1.21	-1.54	-3.78
Mapoly0054s0097	2	-4.63	-4.68	-10.97
Mapoly0054s0104	1	5.47	4.32	1.23
Mapoly0054s0120	2	1.87	7.99	1.9
Mapoly0054s0122	2	3.97	1.06	-1.31
Mapoly0054s0123	2	5.58	0	0
Mapoly0055s0003	2	-5.58	-1.05	0
Mapoly0055s0006	2	1.12	2.09	-1.36
Mapoly0055s0018	2	1.04	1.41	-1.66
Mapoly0055s0044	2	1.23	1.22	-1.67
Mapoly0055s0052	2	1.51	1.44	-1.98
Mapoly0055s0056	1	-2.19	-2.33	-3.84
Mapoly0055s0059	2	-4.98	1.91	1.42
Mapoly0055s0060	1	-1.96	-1.54	-1.24
Mapoly0055s0061	2	1.09	-1.62	1.82
Mapoly0055s0096	2	-1.14	-2.01	-1.61
Mapoly0055s0109	2	1.41	1.65	-7.09
Mapoly0055s0117	1	2.3	1.07	1.78
Mapoly0055s0122	2	1.22	1.28	1.58
Mapoly0055s0123	1	1.39	1.55	-1.05
Mapoly0056s0001	1	1.74	-1.06	-3.5
Mapoly0056s0019	1	-1.36	1.12	-1.61
Mapoly0056s0034	1	2.35	-2.49	-1.98
Mapoly0056s0035	1	-1.02	-1.3	-1.79
Mapoly0056s0070	2	1	1.75	1.03
Mapoly0056s0073	1	-1.6	-1.85	-1.44
Mapoly0056s0076	1	2.56	-1.15	-3.38
Mapoly0056s0082	1	1.28	1.42	2.88
Mapoly0056s0087	1	-1.54	1.28	-1.39
Mapoly0056s0103	2	1.96	-1.36	-1.17
Mapoly0056s0120	2	-1.01	1.27	-2.31
Mapoly0056s0126	2	-2.12	-5.22	5
Mapoly0056s0139	2	1.1	-1.29	-1.73
Mapoly0057s0005	2	1.29	1.71	-2.4
Mapoly0057s0010	1	1.65	-2.9	2.81
Mapoly0057s0011	2	-1.31	-2.85	1.53
Mapoly0057s0013	2	1.15	-1.01	1.82
Mapoly0057s0016	1	-1.37	-2.52	-1.76
Mapoly0057s0018	2	-1.4	2.96	0
Mapoly0057s0020	2	-2.42	2.13	0
Mapoly0057s0049	2	2.29	-1.06	1.95
Mapoly0057s0053	2	-4.06	-1.83	-1.25
Mapoly0057s0054	2	-1.89	-1.09	-2.33
Mapoly0057s0060	2	1.13	1.2	1.74
Mapoly0057s0061	1	1.23	-1	-2.06
Mapoly0057s0063	2	1.24	1.43	-2.17
Mapoly0057s0079	1	-1.23	-2.15	2.06
Mapoly0057s0089	1	1.11	1.32	-2.34
Mapoly0057s0090	2	1.18	1.21	-2.24
Mapoly0057s0092	1	1.4	1.6	-1.84
Mapoly0057s0094	1	1.18	1.55	1
Mapoly0057s0099	2	1.26	1.61	-2.08
Mapoly0057s0107	1	3.15	2.65	-6.38
Mapoly0057s0113	2	-1.57	-1.65	-3.01
Mapoly0057s0114	1	1.35	1.59	-1.73
Mapoly0058s0014	2	-1.37	-1.94	-4.82
Mapoly0058s0015	2	1.36	-1.4	-1.65
Mapoly0058s0022	1	1.06	1.43	-2.48
Mapoly0058s0023	2	-1.33	1.82	-1.75
Mapoly0058s0026	2	1.18	-1.06	1.65
Mapoly0058s0038	1	-1.29	-1.39	-2.97
Mapoly0058s0054	1	-1.09	-1.04	-1.59
Mapoly0058s0069	1	-1.98	-1.02	-1.22
Mapoly0058s0070	2	1.49	1.27	-1.57
Mapoly0058s0080	2	-1.06	-2.69	-1.25
Mapoly0058s0081	1	-4.31	3.3	9.78
Mapoly0058s0087	2	1.13	-1.17	1.66
Mapoly0058s0098	2	-3.49	-1.26	-1.24
Mapoly0058s0103	2	-1.02	-2.18	5.48
Mapoly0058s0104	2	1.17	-1.6	9.76
Mapoly0058s0118	2	-1.35	-1.73	-1.38
Mapoly0059s0001	2	1.32	1.27	-1.52
Mapoly0059s0003	1	-1.41	-1.59	-1.04
Mapoly0059s0017	2	-1.12	1.13	-2.65
Mapoly0059s0029	2	-1.44	-2.15	-1.15
Mapoly0059s0030	2	1.12	-1.75	-1.06
Mapoly0059s0047	2	1.24	1.86	-1.46
Mapoly0059s0068	1	2.02	1.77	-19.48
Mapoly0059s0074	2	-2.08	-1.66	-5.12
Mapoly0059s0090	1	-1.19	-1.05	1.72
Mapoly0059s0101	2	1.35	1.18	1.85
Mapoly0060s0005	2	-1.22	1.29	-2.23
Mapoly0060s0006	2	-1.66	1.55	1.42
Mapoly0060s0009	1	1.27	1.19	4.55
Mapoly0060s0015	2	-2.39	-1.88	-1.57
Mapoly0060s0017	1	1.34	1.04	1.51
Mapoly0060s0019	1	15.79	1.26	303.44
Mapoly0060s0060	2	-1.53	1.02	-1.14
Mapoly0060s0071	1	1.45	1.31	-1.99
Mapoly0060s0090	2	1.04	1.49	-5.55
Mapoly0060s0095	1	-1.08	1.69	1.71
Mapoly0060s0098	1	-1.86	-11.99	-27.86
Mapoly0060s0101	2	1.17	1.66	2.84
Mapoly0060s0110	2	-1.28	-1.22	-2.45
Mapoly0061s0005	2	-11.6	-23.17	-6.7
Mapoly0061s0013	2	1.4	1.31	-1.96
Mapoly0061s0018	1	1.51	1.04	1.14
Mapoly0061s0045	1	-2.82	-5.16	1.97
Mapoly0061s0053	2	1.63	1.43	-1.22
Mapoly0061s0078	2	-1.53	1.09	-1.66
Mapoly0061s0085	2	2.97	1.61	-2.25
Mapoly0061s0094	2	-6.15	1.73	2.14
Mapoly0061s0099	2	-1.15	1.33	-2.51
Mapoly0061s0102	2	1.41	1.6	-1.57
Mapoly0061s0117	2	1.2	-1.1	1.51
Mapoly0061s0118	2	1.35	1.07	-2.52
Mapoly0061s0120	2	1.02	-1.28	-1.75
Mapoly0061s0122	2	1.48	1.19	1.53
Mapoly0061s0126	1	1.4	1.69	-2.32
Mapoly0061s0138	2	-1.52	-1.28	1.13
Mapoly0062s0002	1	-1.99	-1.83	8.71
Mapoly0062s0032	2	-1.09	1.13	2.77
Mapoly0062s0063	2	2.4	1.46	9.78
Mapoly0062s0099	1	1.47	1.51	-1.42
Mapoly0062s0102	1	1.41	1.19	-1.78
Mapoly0062s0125	2	-1.64	-10.57	-26.73
Mapoly0063s0012	2	-1.32	1.19	-1.86
Mapoly0063s0014	2	3.28	2.46	-2.68
Mapoly0063s0023	2	2.9	1.24	1.07
Mapoly0063s0024	2	8.12	1.27	16.27
Mapoly0063s0027	2	-1.95	1.23	-3.02
Mapoly0063s0031	1	1.03	-1.96	1.34
Mapoly0063s0033	1	-1.03	-1.36	-5.54
Mapoly0063s0035	2	1.21	2.14	-1.6
Mapoly0063s0038	2	1.26	1.26	-1.64
Mapoly0063s0049	2	-1.03	-4	2.57
Mapoly0063s0050	1	2.18	1.09	3.68
Mapoly0063s0054	1	1.42	1.35	-1.63
Mapoly0063s0074	2	1.18	1.28	-2.55
Mapoly0063s0075	2	-1.57	-1.49	2.03
Mapoly0063s0085	2	1.64	1.64	-1.26
Mapoly0063s0086	2	1.21	1.3	7.6
Mapoly0063s0087	2	-1.42	1.6	-1.4
Mapoly0063s0091	1	1.03	-1.04	-3.1
Mapoly0064s0028	1	1.16	-1.36	3.68
Mapoly0064s0029	1	1.26	-2.83	11.86
Mapoly0064s0033	2	-1.2	-1.62	-1.31
Mapoly0064s0037	2	-1.08	-1.56	1.25
Mapoly0064s0040	1	1.05	-1.2	-2.09
Mapoly0064s0043	2	-1.1	1.72	-2.13
Mapoly0064s0049	1	-1.12	1.49	-3.68
Mapoly0064s0056	2	1.1	1.63	-1.29
Mapoly0064s0077	1	1.4	1.26	-3.3
Mapoly0064s0097	1	1.26	1.28	-1.8
Mapoly0064s0110	1	-1.53	-1.52	-4.33
Mapoly0064s0111	2	-6.58	-5.37	-24.19
Mapoly0064s0113	1	-1.3	1.3	-6.44
Mapoly0065s0013	1	-1.3	-3.67	2.5
Mapoly0065s0014	1	1.42	-1.08	2.2
Mapoly0065s0017	1	1.65	-1.26	1.32
Mapoly0065s0018	2	-1.68	-1.16	2.55
Mapoly0065s0029	2	-1.06	-1.06	2.08
Mapoly0065s0038	1	-1.52	1.31	-1.01
Mapoly0065s0040	1	1.01	-1.25	1.59
Mapoly0065s0041	2	1.2	1.63	-1.23
Mapoly0065s0042	1	1.17	1.7	-1.46
Mapoly0065s0045	2	-1.53	-4.03	-4.53
Mapoly0065s0050	1	1.05	1.34	-1.52
Mapoly0065s0056	2	1.05	1.22	-3.37
Mapoly0065s0057	1	1.87	1.49	-8.06
Mapoly0065s0058	1	-1.57	-2.54	-2.97
Mapoly0065s0067	1	2.29	2.34	-5.43
Mapoly0065s0068	2	-1.33	-1.7	2.97
Mapoly0065s0071	2	1.28	1.2	1.74
Mapoly0065s0090	2	1.06	1.18	-2.04
Mapoly0066s0011	2	1.07	2.37	1.95
Mapoly0066s0014	2	-1.11	-1.15	10.15
Mapoly0066s0038	2	-1.21	-2.21	11.4
Mapoly0066s0039	1	1.38	-1.22	2.06
Mapoly0066s0042	1	1.12	-2.29	-1.27
Mapoly0066s0050	2	1.3	1.13	-3.42
Mapoly0066s0072	1	-5.26	-3.92	0
Mapoly0066s0077	1	-1.25	-1.69	2.52
Mapoly0066s0087	2	-1.65	1.5	-1.11
Mapoly0066s0089	2	8.06	1.15	6.62
Mapoly0066s0091	2	-3.42	-3.99	1.23
Mapoly0066s0120	1	1.1	1.13	-1.57
Mapoly0067s0013	2	1.07	1.12	1.6
Mapoly0067s0036	2	1.22	1.41	-2.23
Mapoly0067s0037	1	1.25	1.37	-1.71
Mapoly0067s0051	2	-1.43	-2.06	-12.06
Mapoly0067s0072	2	-1.33	-1.2	1.95
Mapoly0067s0073	1	-4.9	1.27	1.54
Mapoly0067s0074	1	-4.96	-1.33	1.4
Mapoly0067s0088	2	-1.28	1.22	-2.7
Mapoly0067s0090	1	1.62	-1.1	5.12
Mapoly0067s0096	1	-1.01	1.45	-1.7
Mapoly0068s0011	2	1.04	1.09	1.79
Mapoly0068s0016	2	-1.14	-2.29	-1.15
Mapoly0068s0018	2	-1.5	-1.85	1.04
Mapoly0068s0039	1	1.71	2.15	2.34
Mapoly0068s0042	2	-1.21	1.83	-4.89
Mapoly0068s0047	1	1.46	-1.02	-2.36
Mapoly0068s0054	2	-1.14	-1.59	-1.23
Mapoly0068s0058	2	-1.39	-1.55	-1.25
Mapoly0068s0065	2	-1.3	1.57	-1.19
Mapoly0068s0071	1	1.28	-1	-5.29
Mapoly0068s0081	1	1.15	-1.13	1.67
Mapoly0068s0095	2	-1.63	-1.8	1.79
Mapoly0068s0102	1	1.65	1.41	-1.57
Mapoly0069s0004	2	1.35	-1.02	1.85
Mapoly0069s0011	2	1.13	1.85	1.46
Mapoly0069s0019	2	2.12	1.4	1.76
Mapoly0069s0029	2	-1.2	1.35	-1.79
Mapoly0069s0062	1	-1.23	-1.8	1.09
Mapoly0069s0065	1	-1.74	-1.05	-1.25
Mapoly0069s0066	2	1.04	1.01	-1.57
Mapoly0069s0089	2	-2.02	-3.72	-1.58
Mapoly0069s0092	2	-5.46	-13.48	-1.07
Mapoly0069s0095	2	1.03	-1.94	6.3
Mapoly0070s0005	1	-1.78	1.11	1.15
Mapoly0070s0008	2	-3.6	-2.04	1.57
Mapoly0070s0009	2	1.37	-1.01	1.72
Mapoly0070s0019	2	-1.06	1.02	-2.21
Mapoly0070s0025	2	1.48	-3.82	1.48
Mapoly0070s0030	2	-1.16	1.23	2.01
Mapoly0070s0036	2	-1.86	-35.35	12.46
Mapoly0070s0038	2	-1.33	-1.19	1.28
Mapoly0070s0041	2	1.08	-2.83	-1.72
Mapoly0070s0051	1	2.38	1.27	2.87
Mapoly0070s0053	2	-1.31	1.24	-1.55
Mapoly0070s0054	1	8.57	3.62	-4.05
Mapoly0070s0064	1	1.89	-2.39	37.56
Mapoly0070s0065	1	1.02	-1.81	12.59
Mapoly0070s0071	2	-1.87	-3.85	26.02
Mapoly0070s0072	2	2.13	-2.77	2.62
Mapoly0070s0079	2	1.56	-1.04	2.35
Mapoly0071s0011	1	-1.97	-1.47	6.8
Mapoly0071s0012	1	-1.04	-1.89	4.31
Mapoly0071s0016	2	1.69	1.43	-1.11
Mapoly0071s0025	2	1.35	1.8	1.09
Mapoly0071s0036	2	-2.39	-2.64	-2.5
Mapoly0071s0057	2	-1.12	-1.97	1.16
Mapoly0071s0061	2	-1.48	1.17	1.77
Mapoly0071s0070	2	1.24	1.58	-1.08
Mapoly0071s0078	2	1.03	1.66	1.64
Mapoly0071s0081	2	1.26	1.06	3.13
Mapoly0071s0084	2	1.16	-1.97	-5.6
Mapoly0071s0096	2	1.58	-1.19	1.77
Mapoly0071s0098	1	-1.14	-1.35	1.51
Mapoly0071s0101	1	-1.28	1.24	-1.82
Mapoly0072s0001	1	4.24	2.12	2.75
Mapoly0072s0015	1	-1.92	-1.42	-1.08
Mapoly0072s0017	1	-1.6	-1.29	-1.4
Mapoly0072s0021	2	-1.05	-1.28	1.58
Mapoly0072s0037	2	1.38	1.66	2.26
Mapoly0072s0060	1	1.37	1.54	-1.32
Mapoly0072s0071	1	1.14	-1.09	1.65
Mapoly0072s0082	1	-2.09	-4.13	-46.13
Mapoly0072s0091	1	-1.2	-1.79	1.13
Mapoly0072s0108	1	-1.58	1.03	-1.1
Mapoly0072s0112	1	16.94	2.76	33.46
Mapoly0073s0001	2	1.77	1.7	1.67
Mapoly0073s0005	2	-1.72	-2.41	-3.45
Mapoly0073s0021	2	4.06	-3.95	1.64
Mapoly0073s0024	2	-1.33	-1.55	-1.1
Mapoly0073s0044	2	-1.67	1.18	-2.62
Mapoly0073s0045	2	-1.49	-1.06	-2.78
Mapoly0073s0055	1	-3.69	1.04	1.06
Mapoly0073s0065	1	-1.59	-1.1	1.08
Mapoly0073s0070	2	-1.54	-1.46	1.2
Mapoly0073s0073	2	-1.54	-1.63	-1.47
Mapoly0073s0077	1	-1.14	2.91	-899.77
Mapoly0073s0082	1	-2.45	-1.29	-1.69
Mapoly0073s0089	1	-1.52	2.96	0
Mapoly0073s0090	2	-1.17	1	2.55
Mapoly0073s0091	1	1.71	1.23	1.01
Mapoly0073s0093	1	-2.1	-2.32	-1.98
Mapoly0074s0011	2	1.44	1.37	-1.65
Mapoly0074s0022	2	-1.94	2.7	-6.26
Mapoly0074s0029	2	-1.07	1.55	-4.94
Mapoly0074s0030	1	2.55	-1.47	-1.14
Mapoly0074s0037	2	1.1	1.46	-2.15
Mapoly0074s0045	2	-1.52	1.16	4.02
Mapoly0074s0077	2	-1.75	1.21	-1.44
Mapoly0074s0087	2	2.8	1.34	3.32
Mapoly0075s0008	1	5.54	2.57	11.61
Mapoly0075s0012	2	-1.35	-3.28	-2.87
Mapoly0075s0013	2	1.87	2.14	-12.34
Mapoly0075s0017	1	1.17	-1.19	2.02
Mapoly0075s0028	2	1.38	-2.26	-1.06
Mapoly0075s0033	2	1.49	1.55	-1.6
Mapoly0075s0034	2	1.27	1.42	-3.04
Mapoly0075s0035	2	-1.55	-1.38	1.32
Mapoly0075s0038	1	-1.64	-1.98	-1.7
Mapoly0075s0041	2	-1.76	-1.76	-1.33
Mapoly0075s0043	2	1.54	1.42	-1.83
Mapoly0075s0045	1	1.04	1.37	-1.7
Mapoly0075s0055	1	1.02	1.33	-1.97
Mapoly0075s0056	1	-1.38	-1.15	-2.82
Mapoly0075s0070	1	-1.89	-3.03	3.05
Mapoly0075s0076	1	-1.34	-1.85	1.45
Mapoly0075s0077	2	1.03	-1.8	2.06
Mapoly0075s0079	2	1.16	-1.25	1.6
Mapoly0075s0080	1	-1.41	-1.21	1.71
Mapoly0076s0001	2	-1.49	1.36	-1.59
Mapoly0076s0004	1	9.22	1.15	2.53
Mapoly0076s0006	1	2.6	-1.21	-3.5
Mapoly0076s0011	1	-2	-1.2	1.36
Mapoly0076s0022	1	-1.67	-1.08	1.01
Mapoly0076s0023	2	-2.05	1.4	-1.44
Mapoly0076s0033	2	-1.48	-1.45	-4.42
Mapoly0076s0038	2	1.7	1.98	1.4
Mapoly0076s0047	1	-1.63	1.39	-1.1
Mapoly0076s0049	2	-1.03	1.52	-1.15
Mapoly0076s0057	2	-62.44	-15.18	-14.05
Mapoly0076s0059	2	-8.39	-16.9	-3.91
Mapoly0076s0085	1	-1.09	-1	-3.15
Mapoly0076s0087	1	1.01	1.43	-6.36
Mapoly0076s0089	2	-1.32	-3.6	1.54
Mapoly0076s0092	2	1.17	1.33	-1.55
Mapoly0077s0001	2	1.57	-44.92	1.74
Mapoly0077s0004	2	-1.1	-1.07	1.78
Mapoly0077s0015	2	-1.71	-5.62	-3.89
Mapoly0077s0025	2	-1.07	-1.39	3.79
Mapoly0077s0052	1	1.04	-1.06	2
Mapoly0077s0057	1	-3.09	-2.94	-1.83
Mapoly0077s0059	2	-1.17	-1.36	-1.56
Mapoly0077s0065	2	-1.17	-1.54	-1.95
Mapoly0078s0009	2	1.34	1.29	-2.19
Mapoly0078s0014	2	-4.53	5.4	-88.64
Mapoly0078s0019	2	-1.13	1.06	1.57
Mapoly0078s0026	1	1.13	-1.61	-2.84
Mapoly0078s0028	1	1.34	1.97	1.3
Mapoly0078s0034	2	-1.02	1.26	-3.45
Mapoly0078s0036	1	-1.32	1.25	2.2
Mapoly0078s0042	2	1.81	-3.14	-3.52
Mapoly0078s0055	2	1.35	1.3	-2.48
Mapoly0078s0061	1	2.02	1.66	2.88
Mapoly0078s0062	1	-1.05	2.1	-5.59
Mapoly0079s0012	2	-5.97	-4.09	-3.89
Mapoly0079s0022	2	-1.01	1.62	-1.77
Mapoly0079s0031	1	-1.61	-1.19	1.31
Mapoly0079s0034	2	-1.14	-1.85	-1
Mapoly0079s0042	2	-1.43	1.63	-1.08
Mapoly0079s0043	2	3.01	2.47	-2.43
Mapoly0079s0044	2	1.85	1.14	-1.06
Mapoly0079s0058	2	1.64	1.24	1.26
Mapoly0079s0067	2	1.87	1.58	1.01
Mapoly0080s0010	2	-1.05	-1.29	1.83
Mapoly0080s0015	2	1.33	-1.84	-3.62
Mapoly0080s0025	1	1.24	1.33	1.59
Mapoly0080s0031	2	1.55	1.63	-3.07
Mapoly0080s0032	2	1.4	-1.08	-5.35
Mapoly0080s0036	1	-1.25	-1.3	1.7
Mapoly0080s0058	2	-1.19	-3	1.52
Mapoly0080s0062	1	-1.08	-1.67	1.17
Mapoly0080s0069	2	1.64	1.38	2.14
Mapoly0080s0073	2	-1.24	-1.7	1.6
Mapoly0080s0076	2	1.74	1.46	5.2
Mapoly0080s0077	2	-4.63	-3.96	1.4
Mapoly0080s0082	2	-1.55	-1.52	1.07
Mapoly0080s0097	1	-1.43	-2.64	-2.21
Mapoly0081s0003	1	-1.46	-2.59	2.15
Mapoly0081s0007	2	-1.51	-2.97	2.58
Mapoly0081s0017	1	-1.24	-1.08	1.61
Mapoly0081s0029	1	1.3	-1.98	-1.33
Mapoly0081s0035	2	1.39	1.14	-9.18
Mapoly0081s0045	1	1.73	1.18	2.29
Mapoly0081s0050	1	1.27	-1.68	2.08
Mapoly0081s0054	2	1.94	1.71	1.4
Mapoly0081s0066	2	2.55	2.26	-3.65
Mapoly0081s0071	2	-1.33	1.09	-4.24
Mapoly0081s0072	1	-1.78	-1.75	-1.43
Mapoly0081s0073	1	-1.36	-1.25	-4.87
Mapoly0082s0016	2	2.24	-2.34	1.41
Mapoly0082s0019	2	1.3	-1.38	-2.17
Mapoly0082s0020	2	2.27	-9.46	-2.73
Mapoly0082s0027	1	-2.48	-4.2	1.04
Mapoly0082s0032	1	1.44	1.89	-3.11
Mapoly0082s0035	1	-1.06	1.53	-1.79
Mapoly0082s0040	2	1.4	1.24	-3.33
Mapoly0082s0046	2	1.09	1.01	-1.62
Mapoly0082s0060	1	-1.07	1.38	-1.71
Mapoly0082s0067	2	1.67	1.11	4.58
Mapoly0082s0072	2	-1.09	-1.3	-2.09
Mapoly0082s0073	2	-1.26	1.22	-1.58
Mapoly0082s0076	2	1.26	-1.52	-2.42
Mapoly0082s0081	2	1.54	1.51	1.08
Mapoly0082s0088	1	-1.41	-2.54	1.54
Mapoly0082s0089	1	-1.63	-1.28	1.71
Mapoly0083s0006	1	-1.36	-1.68	1.76
Mapoly0083s0027	1	2.17	1.75	-3.66
Mapoly0083s0028	2	2.09	1.12	-3.4
Mapoly0083s0036	2	1.11	-1.23	1.78
Mapoly0083s0049	2	1.73	-1.53	2.06
Mapoly0083s0050	2	-1.53	-2	1.92
Mapoly0083s0051	2	-1.72	1.01	1.17
Mapoly0083s0060	2	2.67	1.93	0
Mapoly0083s0063	2	-1.56	1.07	1.3
Mapoly0083s0070	2	-2.17	-9.16	8.66
Mapoly0083s0077	2	-1.07	1.14	-1.84
Mapoly0083s0092	1	1.24	-1.36	2.22
Mapoly0084s0004	2	-1.13	-1.51	-8.56
Mapoly0084s0007	1	-1.6	1.04	-1.04
Mapoly0084s0009	2	1.21	1.56	2.34
Mapoly0084s0014	2	1.86	1.12	2.22
Mapoly0084s0034	2	-1.44	-1.28	1.75
Mapoly0084s0035	2	-1.27	-1.26	2.11
Mapoly0084s0042	2	-3689.3	-2.09	-2.95
Mapoly0084s0044	2	-1.61	1.04	2.64
Mapoly0084s0046	2	-2.01	-2.15	-1.34
Mapoly0084s0053	1	-1.64	-1.35	-1.27
Mapoly0084s0055	2	-2.91	-1.07	-3.34
Mapoly0084s0072	1	2.76	1.89	6.45
Mapoly0084s0073	2	0	2.46	0
Mapoly0084s0078	1	1.53	1.33	-1.46
Mapoly0084s0079	2	-1.19	-1.2	1.55
Mapoly0084s0086	1	1.51	1.35	3.12
Mapoly0085s0005	2	-2.49	-1.37	-1.57
Mapoly0085s0006	2	-2.95	1.72	-5.48
Mapoly0085s0010	2	-1.7	-1.22	1.18
Mapoly0085s0011	2	-4.69	-37.84	-11.86
Mapoly0085s0016	2	-1.73	-2.11	-7.07
Mapoly0085s0019	2	1.08	-1.34	-2.18
Mapoly0085s0022	1	-5.93	-7.61	-5.58
Mapoly0085s0026	1	-1.29	-1.4	-15.15
Mapoly0085s0027	1	-1.3	-1.9	1.39
Mapoly0085s0047	1	3.07	1.65	5.72
Mapoly0085s0082	2	-1.63	-1.55	1.5
Mapoly0085s0094	1	1.86	1.04	2.45
Mapoly0085s0104	2	-4.9	-10.68	-1.99
Mapoly0086s0021	2	1.82	1.39	-1.21
Mapoly0086s0027	1	-3.4	1.25	1.78
Mapoly0086s0033	2	-1.04	1.32	-1.9
Mapoly0086s0039	2	-1.21	1.26	-2.13
Mapoly0086s0079	2	-1.62	1.19	-1.65
Mapoly0087s0010	2	1.48	-1.88	8.98
Mapoly0087s0022	2	1.03	1.4	-2.1
Mapoly0087s0037	2	1.38	-1.03	1.58
Mapoly0087s0043	1	-2.13	-1.25	-2.24
Mapoly0087s0044	2	1.3	-1.8	-2.04
Mapoly0087s0048	2	-2.74	-2.43	-2.02
Mapoly0087s0049	2	1.16	1.76	-1.36
Mapoly0087s0058	2	0	0	7.08
Mapoly0087s0064	2	-1.33	-1.82	1.72
Mapoly0087s0065	1	1.66	-1.86	1.77
Mapoly0087s0068	1	2.27	1.2	-15.92
Mapoly0087s0086	2	1.58	-1.95	4.72
Mapoly0088s0005	1	2.24	1.93	-1.99
Mapoly0088s0011	1	-1.5	-1.53	1.18
Mapoly0088s0016	2	-1.24	-1.9	1.77
Mapoly0088s0025	2	1.12	-1.82	3.47
Mapoly0088s0029	2	-1.25	-2.35	1.14
Mapoly0088s0030	2	2.17	-1.03	1.23
Mapoly0088s0036	2	1.49	1.31	3.42
Mapoly0088s0038	1	1.49	2.59	0
Mapoly0088s0039	2	5.21	1.52	4.32
Mapoly0088s0042	2	2.62	2.98	-1.04
Mapoly0088s0072	2	-1.28	-2.25	1.79
Mapoly0088s0084	2	-1.57	-5.23	-2.3
Mapoly0088s0085	2	-3.72	-8.77	-2.79
Mapoly0088s0086	1	-1.42	-4.04	-2.36
Mapoly0088s0087	2	-1.62	-8.05	-1.29
Mapoly0088s0088	1	-2.01	-1.84	1.18
Mapoly0088s0089	2	-4.24	-8.82	-2.26
Mapoly0089s0006	2	3.57	2.29	10.21
Mapoly0089s0007	1	1.02	1.4	-2.07
Mapoly0089s0017	1	1.12	-3.58	-6.7
Mapoly0089s0018	1	-1.14	1.19	-1.85
Mapoly0089s0019	1	0	-4.59	-1.48
Mapoly0089s0020	2	1.21	-5.01	-4.85
Mapoly0089s0021	2	-1.22	-4.61	-2.93
Mapoly0089s0022	1	1.96	1.29	3.05
Mapoly0089s0023	2	-2.59	-2.72	-11.27
Mapoly0089s0025	2	-1.06	-1.11	-1.73
Mapoly0089s0026	2	-1.1	-1.83	1.14
Mapoly0089s0036	1	1.25	-1.4	2.63
Mapoly0089s0038	1	-1.13	1.21	-1.68
Mapoly0089s0042	2	1.21	-1.05	3.39
Mapoly0089s0045	1	3.24	2.11	2.82
Mapoly0089s0046	2	-1.23	-1.38	-1.51
Mapoly0089s0049	2	1.12	1.14	2.36
Mapoly0089s0053	1	1.06	-1.04	1.69
Mapoly0089s0069	1	1.31	-1.69	-6
Mapoly0090s0014	2	-1.52	-1.28	1.18
Mapoly0090s0017	1	-1.09	-1.37	-1.52
Mapoly0090s0031	1	-1.68	-4.21	2.34
Mapoly0090s0043	2	-1.6	-1.17	-1.05
Mapoly0090s0046	2	-1.76	-1.75	-1.58
Mapoly0090s0053	2	-1.21	-1.72	1.35
Mapoly0090s0054	1	1.07	-1.46	-2.14
Mapoly0090s0057	2	2.73	1.55	1.21
Mapoly0090s0062	2	-1.09	-3.59	-1.15
Mapoly0090s0072	1	-1.05	1.12	-2.48
Mapoly0090s0079	1	1.78	2.4	1.49
Mapoly0090s0094	2	1.24	1.02	2.47
Mapoly0091s0003	1	-1.27	1.28	-2.65
Mapoly0091s0004	1	-1.29	1.2	3.19
Mapoly0091s0013	1	-1.57	1.26	1.39
Mapoly0091s0014	2	-2.77	1.64	1.25
Mapoly0091s0019	1	-1.02	1.08	-1.86
Mapoly0091s0035	1	-3.07	-3.51	-3.89
Mapoly0091s0043	1	-1.74	1.81	-3.27
Mapoly0091s0047	1	-1.07	-1.05	1.68
Mapoly0091s0054	2	1.3	-1.14	1.73
Mapoly0091s0060	1	-1.65	1.59	-1.84
Mapoly0091s0074	2	1.26	-1.15	1.71
Mapoly0091s0075	2	-1.14	-1.93	1.07
Mapoly0092s0040	2	1.16	1.14	-2.59
Mapoly0092s0046	2	-1.21	-1.01	1.58
Mapoly0092s0055	1	3.56	2.86	-1.06
Mapoly0092s0058	2	2.18	2.43	1.7
Mapoly0092s0060	1	2.38	1.16	-8.58
Mapoly0092s0066	1	1.33	-1.41	2.1
Mapoly0092s0072	2	-5.24	-9.85	-6.47
Mapoly0093s0009	2	1.46	2.18	-6.11
Mapoly0093s0013	2	-2.47	-1.76	-4.79
Mapoly0093s0016	2	1.45	2.83	3.93
Mapoly0093s0018	2	1.73	2.34	2
Mapoly0093s0023	1	1.26	1.51	-1.01
Mapoly0093s0025	1	-1.09	1.28	-1.35
Mapoly0093s0032	2	1.16	1.66	-1.01
Mapoly0093s0039	2	-2.16	-1.66	1.59
Mapoly0093s0040	1	-1.33	-1.21	1.53
Mapoly0093s0041	1	-1.38	-1.32	1.61
Mapoly0093s0064	2	2.21	-1.01	2.08
Mapoly0093s0069	1	2.49	2.51	-2.29
Mapoly0093s0077	1	-1.54	1	1.26
Mapoly0094s0001	1	-1.07	1.17	-2.43
Mapoly0094s0020	2	1.92	1.59	2.23
Mapoly0094s0038	1	1.83	1.27	-2.01
Mapoly0094s0048	1	-3.15	-1.55	10.33
Mapoly0094s0049	2	5	1.32	16.72
Mapoly0094s0076	2	-2.02	-2.72	-7.48
Mapoly0095s0012	2	4.16	2.4	-1.76
Mapoly0095s0019	2	2.74	1.49	1.16
Mapoly0095s0025	2	-1.18	-1.46	1.72
Mapoly0095s0026	1	1.56	1.23	-2.15
Mapoly0095s0054	2	-2.23	-1.56	-1.97
Mapoly0095s0056	2	1.02	1.42	-1.76
Mapoly0096s0011	2	-1.61	1.67	1.5
Mapoly0096s0017	1	-1.05	1.07	1.56
Mapoly0096s0020	2	-1.81	-1.12	-2.08
Mapoly0096s0030	2	1.77	-1.28	1.23
Mapoly0096s0037	1	1.73	7.26	-2.24
Mapoly0096s0039	2	2.05	-1.52	1.33
Mapoly0096s0051	1	1.38	1.14	-1.6
Mapoly0096s0062	2	-1.19	2.08	2.73
Mapoly0096s0069	2	-3.24	-3.81	1.28
Mapoly0097s0009	1	1.42	-10.12	122.89
Mapoly0097s0012	1	3.59	-140.43	-3.02
Mapoly0097s0022	1	1.66	1.44	1.33
Mapoly0097s0025	2	1.07	-1.2	-2.83
Mapoly0097s0031	2	-1.1	1.59	-1.53
Mapoly0097s0032	1	-2.62	-1.48	0
Mapoly0097s0033	1	-1.56	-1.14	-2441.7
Mapoly0097s0034	2	-10.26	-39.54	-3.44
Mapoly0097s0037	2	1.62	1.09	1.27
Mapoly0097s0042	2	1.58	-1.02	-1.29
Mapoly0097s0044	1	1.7	1.03	2.22
Mapoly0097s0045	2	889.04	1.89	-2.41
Mapoly0097s0070	1	-1.04	1.67	1.41
Mapoly0097s0072	2	-1.28	1.1	3.62
Mapoly0097s0082	2	-1.01	-4.07	5.8
Mapoly0097s0083	2	1.3	-4.97	5.64
Mapoly0097s0092	1	-3.18	0	4.28
Mapoly0098s0001	2	-1.65	-3.63	-1.29
Mapoly0098s0009	2	-3.27	-1.52	-6.55
Mapoly0098s0014	2	-2.22	-3.14	-5.64
Mapoly0098s0016	1	-2.07	-1.77	-2.93
Mapoly0098s0023	2	-2.31	-1.89	-1.6
Mapoly0098s0024	2	1.12	1.04	1.51
Mapoly0098s0026	1	1.03	-1.47	-3.89
Mapoly0098s0030	2	-2	-7.48	-1.02
Mapoly0098s0032	1	-1.13	-1.09	-4.27
Mapoly0098s0034	1	-1.07	-1.78	-1.92
Mapoly0098s0035	2	-1.02	-1.36	1.6
Mapoly0098s0043	2	-1.02	1.15	-1.75
Mapoly0098s0046	2	-1.32	-1.05	1.65
Mapoly0098s0053	1	1.2	1.51	-1.89
Mapoly0098s0058	2	-1.28	1.02	-1.52
Mapoly0099s0006	1	-1.37	1.58	1.29
Mapoly0099s0018	2	0	-4.28	0
Mapoly0099s0026	1	-1.35	-1.64	2.91
Mapoly0099s0041	2	1	-1.04	1.65
Mapoly0099s0049	2	1.44	-1.19	1.93
Mapoly0099s0052	2	2.83	1.21	4.72
Mapoly0099s0053	2	1.52	2.5	-6.06
Mapoly0099s0054	1	-2.03	-1.58	1.15
Mapoly0099s0055	2	-1.7	-1.48	-3.92
Mapoly0100s0039	1	1.36	1.59	-1.11
Mapoly0100s0041	1	1.77	-1.52	1.17
Mapoly0100s0057	2	-1.34	-1.33	-2.35
Mapoly0100s0058	2	-4.57	-3.84	-1.89
Mapoly0100s0060	1	1.06	1.55	-2.68
Mapoly0100s0061	1	-10.13	-9.58	-1.43
Mapoly0101s0004	2	-1.18	-1.85	-1.71
Mapoly0101s0014	2	1.51	1.02	1.72
Mapoly0101s0029	2	1.81	1.51	1.96
Mapoly0101s0038	2	-1.42	-8.69	3.15
Mapoly0101s0063	1	1.15	-1.15	1.75
Mapoly0101s0064	2	1.12	-1.31	2.12
Mapoly0101s0065	1	-1.82	-1.86	-5.94
Mapoly0102s0033	2	1.15	-1.15	1.53
Mapoly0102s0037	1	1.07	-1.21	-4.73
Mapoly0102s0039	2	-1.06	1.19	-1.62
Mapoly0102s0041	1	1.21	1.19	-1.53
Mapoly0102s0043	2	-1.05	-2.79	-1.4
Mapoly0102s0045	1	1.59	1.07	1.35
Mapoly0102s0048	2	-1.08	2.91	0
Mapoly0102s0054	2	3.09	3.09	0
Mapoly0103s0004	2	-1.35	-1.27	-1.52
Mapoly0103s0005	1	1.25	1.72	-1.59
Mapoly0103s0008	1	-1.34	-1.59	-5.78
Mapoly0103s0038	1	1.18	-1.18	4.24
Mapoly0103s0041	2	18.27	-1.2	295.93
Mapoly0103s0053	2	1.42	2.37	1.26
Mapoly0103s0079	2	-1.19	-1.24	-6.66
Mapoly0104s0016	1	-1.12	-1.17	1.99
Mapoly0104s0024	1	-1.05	-1.25	1.81
Mapoly0104s0025	2	-1.29	183.49	-3.52
Mapoly0104s0026	2	-2.69	-2.67	-4.6
Mapoly0104s0027	2	1.95	1.01	1.72
Mapoly0104s0030	2	1.45	1.04	2.51
Mapoly0105s0007	2	1.21	-1.11	1.56
Mapoly0105s0012	2	1.83	-1.38	4.94
Mapoly0105s0022	1	1.43	1	1.64
Mapoly0105s0038	1	1.1	1.51	-1.86
Mapoly0105s0040	1	-1.17	-1.28	-12.34
Mapoly0105s0043	2	-1.19	-1.06	-1.79
Mapoly0105s0051	1	-1.2	1.26	-2.23
Mapoly0105s0052	1	1.49	1.53	-1.68
Mapoly0105s0053	2	2.08	1.67	0
Mapoly0105s0059	1	1.1	1.22	-1.73
Mapoly0106s0003	2	1.56	1.97	-2.46
Mapoly0106s0025	2	-3.42	-1.42	-5.42
Mapoly0106s0030	2	0	-27.1	-5.77
Mapoly0106s0033	2	-2.52	-2.12	1.21
Mapoly0106s0055	2	1.83	-1.59	3.05
Mapoly0107s0007	2	-1.81	1.07	-1.32
Mapoly0107s0014	2	-1.58	-1.02	1.1
Mapoly0107s0025	2	2.75	2.24	2.21
Mapoly0107s0049	1	-1.82	-1.69	-3.34
Mapoly0108s0010	2	2.28	2.77	-1.32
Mapoly0109s0002	2	0	-1.8	2.53
Mapoly0109s0009	2	1.64	1.22	-1.52
Mapoly0109s0011	2	1.47	1.66	-1.14
Mapoly0109s0016	2	-1.65	1.28	-1.24
Mapoly0109s0033	2	3.79	-1.04	3.36
Mapoly0109s0035	2	1.2	-2.89	-1.91
Mapoly0109s0040	2	-2.52	-14.92	-2.08
Mapoly0109s0046	1	-1.61	-1.44	-3.08
Mapoly0109s0047	1	1.58	1.14	1.62
Mapoly0109s0051	2	1.26	-1.09	2.61
Mapoly0109s0062	2	1.02	-1.04	1.58
Mapoly0110s0006	2	-1.27	-2.43	1.13
Mapoly0110s0012	1	1.61	1.36	-1.17
Mapoly0110s0017	2	0	-9.31	2.9
Mapoly0110s0024	2	-1.26	-1.36	-4.94
Mapoly0110s0027	2	1.14	-1.19	2.87
Mapoly0111s0015	1	-1.08	1.12	-1.84
Mapoly0111s0026	1	1.73	1.07	-1.26
Mapoly0111s0037	2	-1.26	-1.41	3.84
Mapoly0112s0009	2	-2.11	2.37	-733.1
Mapoly0112s0021	2	1.13	1.2	1.82
Mapoly0112s0023	2	-7.09	-3.81	-18.99
Mapoly0112s0025	2	1.58	1.25	-3.23
Mapoly0112s0029	2	-1.16	-1.66	-5.31
Mapoly0112s0033	1	1.03	1.28	-1.54
Mapoly0112s0036	1	-1.77	-1.15	1.56
Mapoly0112s0038	2	4.65	4.26	0
Mapoly0112s0041	2	4.07	1.89	7.33
Mapoly0112s0042	2	5.83	-1.56	2.56
Mapoly0112s0043	1	2.51	1.02	1.36
Mapoly0112s0046	1	4.99	-2.82	-3.97
Mapoly0112s0050	2	2.28	2.51	-3.44
Mapoly0113s0004	2	1.35	1.53	-1.42
Mapoly0113s0006	2	-1.24	-1.11	-1.79
Mapoly0113s0020	2	-1.53	-1.28	-2.03
Mapoly0113s0039	2	-1.61	-1.48	-1.97
Mapoly0114s0013	2	1.21	-1.11	-1.89
Mapoly0114s0019	1	-1.22	-1.52	1.6
Mapoly0114s0041	2	1.15	1.07	1.55
Mapoly0114s0047	2	-2.34	-2.65	1.59
Mapoly0114s0052	1	1.18	1.28	-16.95
Mapoly0114s0053	1	1.13	1.44	-5.42
Mapoly0114s0055	1	1.16	1.59	-4.47
Mapoly0114s0056	2	1.18	1.55	-7.91
Mapoly0115s0011	2	1.03	-1.09	-1.96
Mapoly0115s0016	2	-1.67	1.85	-1.31
Mapoly0115s0018	2	1.06	-1.6	1.71
Mapoly0115s0022	1	-2.25	-2.92	2.43
Mapoly0115s0025	2	1.21	-1.04	1.91
Mapoly0115s0030	1	1.32	1.25	-4.36
Mapoly0115s0043	2	-1.41	-7.54	64.06
Mapoly0115s0051	2	1.68	1.57	-2.39
Mapoly0115s0069	2	-1.56	-1.3	1.06
Mapoly0116s0008	2	3.81	0	0
Mapoly0116s0009	2	4.4	1.72	2.9
Mapoly0116s0021	2	1.54	2.12	7
Mapoly0116s0024	2	-1.43	1.54	-3.43
Mapoly0116s0025	2	-2.01	-1.93	1.21
Mapoly0116s0031	2	1.52	-1.31	1.72
Mapoly0116s0048	1	4.01	-1.1	7.86
Mapoly0116s0052	2	1.56	-1.89	1.9
Mapoly0117s0014	2	1.09	-3.92	80.45
Mapoly0117s0015	2	-1.12	-1.14	-21.44
Mapoly0117s0016	1	1.06	-4.61	18.57
Mapoly0117s0024	2	3.46	-1.16	18.94
Mapoly0117s0029	2	2.37	-2.76	47.48
Mapoly0117s0031	1	-1.02	-1.76	1.18
Mapoly0117s0046	2	-1.33	-2.1	-4.2
Mapoly0117s0051	2	1.81	-1.86	8.04
Mapoly0118s0011	2	-1.04	-1.02	1.61
Mapoly0118s0015	1	-3.8	-4.04	-5.55
Mapoly0118s0020	1	-1.29	-1.24	-2.32
Mapoly0118s0022	2	-1.33	-1.94	-6.09
Mapoly0118s0023	1	1.29	1.15	-2.79
Mapoly0118s0045	2	4.42	1.64	7.44
Mapoly0118s0047	2	10.23	4.38	7.64
Mapoly0118s0049	2	1.03	-2.71	-1.42
Mapoly0119s0016	1	-1.37	-1.63	-5
Mapoly0119s0034	1	1.03	1.51	-1.91
Mapoly0119s0035	1	1.63	-2435.02	-1.33
Mapoly0119s0056	2	-1.44	-2.18	2.14
Mapoly0120s0017	1	2.52	2.16	1.84
Mapoly0120s0019	2	-1.88	-1.27	-1.06
Mapoly0120s0021	2	1.74	1.63	-1.47
Mapoly0120s0036	1	-1.11	1.46	-1.54
Mapoly0120s0041	1	2.44	1.39	-1.07
Mapoly0120s0045	2	1.79	1.03	1.3
Mapoly0121s0006	2	15.02	-1.26	-29.6
Mapoly0121s0007	2	12.65	-1.37	-26.37
Mapoly0121s0009	1	8.89	1.28	-2.38
[truncated: 431 more rows]
